# Supplementary material
Source: PubMed Central journal article supplement (PMC2862194)
Supplement: mmc1.pdf [file mmc1.pdf]

Biophysical Journal, Volume 98

**Supporting Material**

**Predicting Interaction Sites from the Energetics of Isolated Proteins: A New Approach to Epitope Mapping**

Guido Scarabelli, Giulia Morra, and Giorgio Colombo

# Predicting Interaction Sites from the Energetics of Isolated Proteins: A New Approach to Epitope Mapping

Guido Scarabelli, Giulia Morra, and Giorgio Colombo\*

Istituto di Chimica del Riconoscimento Molecolare, CNR, Via Mario Bianco 9, 20131 Milano, Italy

## Molecular Dynamics Simulation Runs.

All the starting structures of the proteins were downloaded from the Protein Data Bank, their respective codes are reported in Table I and subjected to explicit water MD simulations. The structures of the isolated antigens were solvated with explicit water, using the SPC water model {Berendsen, 1987 #309} in triclinic or cubic boxes (depending on the protein shape) large enough to contain the whole protein and 1.4 nm of solvent from the protein. The total charge of each system was neutralized with suitable counter ions. The systems were subsequently optimized through a molecular mechanics process with the steepest descent algorithm (2000 steps).

The MD simulations were started from the minimized systems and carried out using GROMACS {van der Spoel, 2004 #2708}, with GROMOSS96 43A1 force field {Scott, 1999 #2357}. The LINCS algorithm {Hess, 1997 #1425} was used to constrain the bond lengths for the all atoms. The electrostatic interactions were calculated through PME implementation of Ewald summation method. The temperature was set to 300K and kept constant with the Berendsen thermostat {Berendsen, 1984 #157} with a coupling constant of 0.1 ps. The timestep used was 2 fs. 5 simulations of 30 ns each with different random initial velocities were run for each protein, to check the dependence of the results on the simulation conditions. The first 5 ns of each simulation were discarded from the final analysis. The average simulation time using a parallel calculation on 32 Intel Xeon 3.166GHz cores for a protein of 200 residues is around 24 hours.

## References.

1. Berendsen, H. J. C., J. R. Grigera, and P. R. Straatsma. 1987. The missing term in effective pair potentials. *J. Phys. Chem.* 91:6269-6271.
2. van der Spoel, D., E. Lindahl, B. Hess, A. R. van Buuren, E. Apol, P. J. Meulenhoff, D. P. Tieleman, A. L. T. M. Sijbers, K. A. Feenstra, R. van Drunen, and H. J. C. Berendsen. 2004. Gromacs User Manual version 3.2. [www.gromacs.org](http://www.gromacs.org).
3. Scott, W. R. P., P. H. Hunenberger, I. G. Tironi, A. E. Mark, S. R. Billeter, J. Fennen, A. E. Torda, T. Huber, P. Kruger, and W. F. V. Gunsteren. 1999. TheGROMOS biomolecular simulation program package. *J.Phys.Chem.A* 103:3596-3607.
4. Hess, B., H. Bekker, J. G. E. M. Fraaije, and H. J. C. Berendsen. 1997. A linear constraint solver for molecular simulations. *J.Comp.Chem.* 18:1463-1472.
5. Berendsen, H. J. C., J. P. M. Postma, W. F. van Gunsteren, A. Di Nola, and J. R. Haak. 1984. Molecular dynamics with coupling to an external bath. *J. Chem. Phys.* 81:3684-3690.



**Table S1.** PDB codes of the isolated antigen, of its complex with the antibody and the biological role. In parentheses, we have reported the resolution of the crystals from which the antigens structures were obtained.

| <b>Antigen</b>           | <b>Antigen-Antibody complexes</b>                                                             | <b>Biological Role</b>                      |
|--------------------------|-----------------------------------------------------------------------------------------------|---------------------------------------------|
| 1AO3 (2.2)               | 1FE8 (2.03); 2ADF (2.90)                                                                      | von Willerbrand factor domain A3            |
| 1AUQ (2.3)               | 1OAK (2.20)                                                                                   | von Willerbrand factor domain A1            |
| 1BV1 (2.0)               | 1FSK (2.90)                                                                                   | Major pollen allergen Bet V 1-A             |
| 1CK4 (2.2)               | 1MHP (2.80)                                                                                   | alpha I beta 1 Integrin I-domain            |
| 1CMW (2.6)               | 1BGX (2.30)                                                                                   | Taq DNA polymerase I                        |
| 1D7P (1.5)               | 1IQD (2.00)                                                                                   | Coagulation factor VIII precursor           |
| 1GWP (NMR)               | 1AFV (3.70)                                                                                   | Gag polyprotein                             |
| 1HCN (2.6)               | 1QFW (1.36)                                                                                   | Human chronic gonadotropin                  |
| 1K59 (1.8)               | 1H0D (2.0)                                                                                    | Angiogenin                                  |
| 1KDC (2.00)              | 1NSN (2.8)                                                                                    | Staphylococcal nuclease                     |
| 1KZQ (1.7)               | 1YNT (3.1)                                                                                    | Major Surface Antigen SAG1                  |
| 1P4P (2.0)               | 1RJL (2.6)                                                                                    | Outer surface protein B                     |
| 1PKO (1.45)              | 1PKQ (3.0)                                                                                    | Myelin oligodendrocyte glycoprotein         |
| 1POH (2.0)               | 2JEL (2.5)                                                                                    | Histidine containing phosphocarrier protein |
| 1TFH (2.4)               | 1AHW (2.5)                                                                                    | Human tissue factor                         |
| 1UW3 (2.05)              | 1TPX (2.56)                                                                                   | Prion protein                               |
| 2VPF (2.5)               | 1BJ1 (2.4), 2FJG (2.8)                                                                        | Vascular endothelial grow factor            |
| 3LZT <sup>2</sup> (0.93) | 1FDL (2.5),<br>1YQV (1.7), 1MLC (2.5), 1IC4 (2.5),<br>1NDG (1.9), 1DQJ (2.00),<br>1NDM (2.1), | Lysozyme                                    |
| 7NN9 (2.0)               | 1NCA (2.5)                                                                                    | Neuroamidase N9                             |

**Table S2.** Distance between the first and second eigenvectors, average distance between all other eigenvectors for simulated proteins, percentage of the stabilization energy accounted for by the first eigenvalue and corresponding eigenvector.

| Protein | $\Delta\lambda_{1-2}$ | $\Delta\lambda_{\text{average}}$ | $\lambda_1 w_i^1 w_j^1$ fraction of $E_{nb}(\%)$ |
|---------|-----------------------|----------------------------------|--------------------------------------------------|
| 1AO3    | 2.412                 | 0.045                            | 74.7                                             |
| 1AUQ    | 1.597                 | 0.060                            | 89.3                                             |
| 1BV1    | 2.550                 | 0.069                            | 68.0                                             |
| 1CK4    | 2.709                 | 0.054                            | 58.0                                             |
| 1CMW    | 2.07                  | 0.051                            | 51.0                                             |
| 1D7P    | 2.617                 | 0.070                            | 65.8                                             |
| 1GWP    | 3.088                 | 0.042                            | 73.4                                             |
| 1HCN    | 1.409                 | 0.031                            | 47.0                                             |
| 1K59    | 2.981                 | 0.077                            | 70.0                                             |
| 1KDC    | 3.685                 | 0.083                            | 69.1                                             |
| 1KZQ    | 2.851                 | 0.067                            | 66.0                                             |
| 1P4P    | 3.038                 | 0.056                            | 56.7                                             |
| 1PKO    | 2.665                 | 0.085                            | 61.2                                             |
| 1POH    | 4.893                 | 0.089                            | 64.6                                             |
| 1TFH    | 1.187                 | 0.055                            | 44.6                                             |
| 1UW3    | 1.893                 | 0.116                            | 65.1                                             |
| 2VPF    | 1.358                 | 0.111                            | 73.7                                             |
| 3LZT    | 2.971                 | 0.071                            | 72.1                                             |
| 7NN9    | 1.987                 | 0.022                            | 62.6                                             |

**Table S3:** Sequences of the predicted epitopes for each of the proteins.

| 1AO3      |                                                                                                                 |
|-----------|-----------------------------------------------------------------------------------------------------------------|
| Sequences | 97-TSEMHG-102<br>104-RPG-106<br>124-DAAADAARSNRV-135<br>137-V<br>152-RILAGPAGDSNV-163<br>171-D<br>173-PTMVT-177 |

| 1AUQ      |                                                                                                                                             |
|-----------|---------------------------------------------------------------------------------------------------------------------------------------------|
| Sequences | 559-HDG-561<br>585-KYAGSQV-591<br>602-LFQ-604<br>607-SKIDRPE-613<br>626-EPQRMSRN-633<br>636-RYVQGLKKKKV-646<br>652-GIG-654<br>668-QAPEN-672 |

| 1BV1      |                                                                                                                                       |
|-----------|---------------------------------------------------------------------------------------------------------------------------------------|
| Sequences | 14-PA-15<br>17-R<br>31-PKVAPQ-36<br>46-GNGGPG-51<br>58-F<br>60-EGLPFKYV-67<br>88-GGP-90<br>107-TPDGG-111<br>113-IL-114<br>124-GDH-126 |

| 1CK4      |                                                                                                                                      |
|-----------|--------------------------------------------------------------------------------------------------------------------------------------|
| Sequences | 156-SNSIYPWESVIA-167<br>191-GEN-193<br>212-AANK-215<br>218-RQGGLQT-224<br>260-SHDNY-264<br>286-LGHYNRGNLSTEK-298<br>319-SDELALVT-326 |

| 1CMW      |                                                                                                                                                                                                                                                                                                                                                                                                                                      |
|-----------|--------------------------------------------------------------------------------------------------------------------------------------------------------------------------------------------------------------------------------------------------------------------------------------------------------------------------------------------------------------------------------------------------------------------------------------|
| Sequences | 30-LKGLTTSRGEP-40<br>87-PTP-89<br>193-LPGVKGIGEKTARK-206<br>221-LDRLKPAI-228<br>230-EKI-232<br>234-AH-235<br>237-DDL-239<br>264-PDRERLRA-271<br>273-LERLEFGSL-281<br>335-APEPYKA-341<br>364-GLGLP-368<br>381-DPSNTTPEGVARRYGG-396<br>421-EGEER-425<br>447-TGVR-450<br>452-DVAYLRALSLEVA-464<br>546-IDPLPD-551<br>585-PVR-587<br>648-GVPREAVDPLMRR-660<br>674-SAHRLSQELAIPIYEEAQAF-692<br>713-EGRRRG-718<br>729-YVPDLEARVKSUREAAE-745 |

| 1D7P      |                                                                                                                                                                            |
|-----------|----------------------------------------------------------------------------------------------------------------------------------------------------------------------------|
| Sequences | 2197-TNMFA-2201<br>2221-PQVNNP-2226<br>2236-KT-2237<br>2239-K<br>2241-T<br>2249-KSLLT-2253<br>2274-FFQNGKVKV-2282<br>2288-D<br>2290-FTP-2292<br>2294-V<br>2296-CLDPPL-2301 |

| 1GWP      |                                              |
|-----------|----------------------------------------------|
| Sequences | 84-HPVHAGPIAPGQMREPRG-101<br>119-THNPPI-1124 |

| 1HCN      |                                                                                                                                     |
|-----------|-------------------------------------------------------------------------------------------------------------------------------------|
| Sequences | <u>Chain A</u><br>15-NPFFSQPGAPI-25<br>69-TVMGGFK-75<br><u>Chain B</u><br>22-GCPVC-26<br>49-LPA-51<br>67-IRLPGCP-73<br>75-GVNPVV-80 |

| 1K59      |                                                                   |
|-----------|-------------------------------------------------------------------|
| Sequences | 36-TSPC-39<br>63-NPHRENL-69<br>83-LHGGSPWPPCQ-93<br>108-ENGLP-112 |

| 1KDC      |                                                                |
|-----------|----------------------------------------------------------------|
| Sequences | 26-M<br>28-KGQPM-32<br>41-TPETKHPKKGVEKYGPEASA-60<br>84-KYG-86 |

| 1KZQ |  |
|------|--|
|      |  |



|           |                                                                                                                                                                                                                                                              |
|-----------|--------------------------------------------------------------------------------------------------------------------------------------------------------------------------------------------------------------------------------------------------------------|
| Sequences | 13-PDKKST-18<br>34-CPKTA-38<br>55-PAGT-58<br>61-SCTS-64<br>102F<br>104-VT-105<br>115-KGDDAQ-120<br>122-C<br>129-QAR-131<br>135-VVN-137<br>144-YGA-146<br>156-SAEGPT-161<br>167-GKDG-171<br>199-LPKLTEN-205<br>214-DKG-216<br>222-KKEAF-226<br>239-GGSPEK-244 |
|-----------|--------------------------------------------------------------------------------------------------------------------------------------------------------------------------------------------------------------------------------------------------------------|

|           |                                                            |
|-----------|------------------------------------------------------------|
| 1P4P      |                                                            |
| Sequences | 228-DTAGSNKK-235<br>250-ADSKK-254<br>269-QQYNTAGTSLEGS-282 |

|           |                                                         |
|-----------|---------------------------------------------------------|
| 1PKO      |                                                         |
| Sequences | 27-SPGKNATG-34<br>76-IGEGKV-81<br>102-DHSY-105<br>107-E |

|           |                                      |
|-----------|--------------------------------------|
| 1POH      |                                      |
| Sequences | 11-PNG-13<br>15-HTRP18<br>55-LTQG-58 |

| 1TFH      |                                                                                                              |
|-----------|--------------------------------------------------------------------------------------------------------------|
| Sequences | 81-G<br>83-VA-84<br>111-PTI-113<br>116-FEQVGTK-122<br>154-T<br>156-YYWKSSSSGKKTAKT-170<br>179-VDKGENYCFS-188 |

| 1UW3      |                                                        |
|-----------|--------------------------------------------------------|
| Sequences | 162-Y<br>164-RP-165<br>167-DQ-168<br>188-TVTTTTTKG-195 |

| 2VPF      |                                 |
|-----------|---------------------------------|
| Sequences | 23-RSYCH-27<br>59-GGCCNDEGLE-67 |

| 3LZT      |                                                       |
|-----------|-------------------------------------------------------|
| Sequences | 11-A<br>13-KRHG-16<br>66-DGRTPGS-72<br>114-RCKGTD-119 |

| 7NN9      |                                                                                                                                                                                                                             |
|-----------|-----------------------------------------------------------------------------------------------------------------------------------------------------------------------------------------------------------------------------|
| Sequences | 105-AVRIGEDSDV-114<br>138-TTIRGKHSNGTI-149<br>165-SPPT-168<br>247-TGP-249<br>269-AGT-271<br>307-PVA-309<br>318-CSPV-321<br>327-RPNDPTVGKCNDPYPG-343<br>356-DGVN-359<br>377-L<br>379-VPNALTDDKSKPTQ-392<br>451-TEFLGQWDW-459 |

### Flexibility of the proteins analyzed from MD simulations.

Protein flexibility was characterized in terms of Root Mean Square Fluctuations (RMSF) around the average structure obtained from MD simulations. Epitope residues are highlighted by gray shading. It is immediately apparent that flexibility alone is not a sufficient criterion to discriminate epitopes or protein interaction sites from other regions.

#### 1AO3

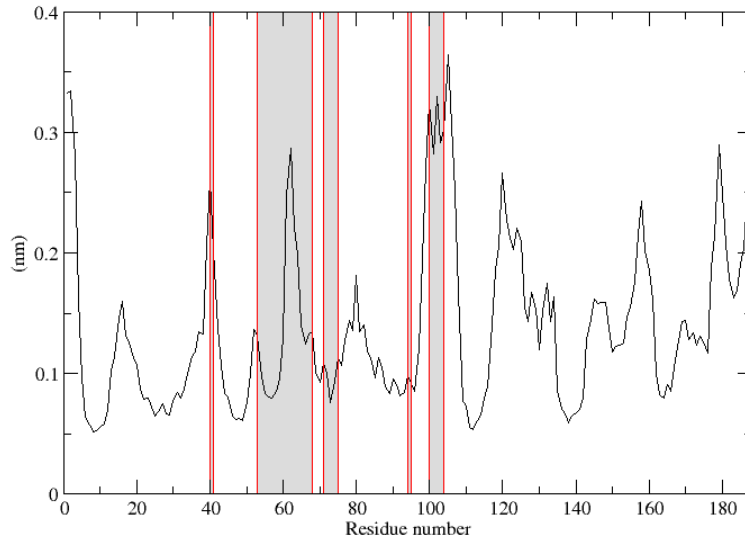

#### 1AUQ

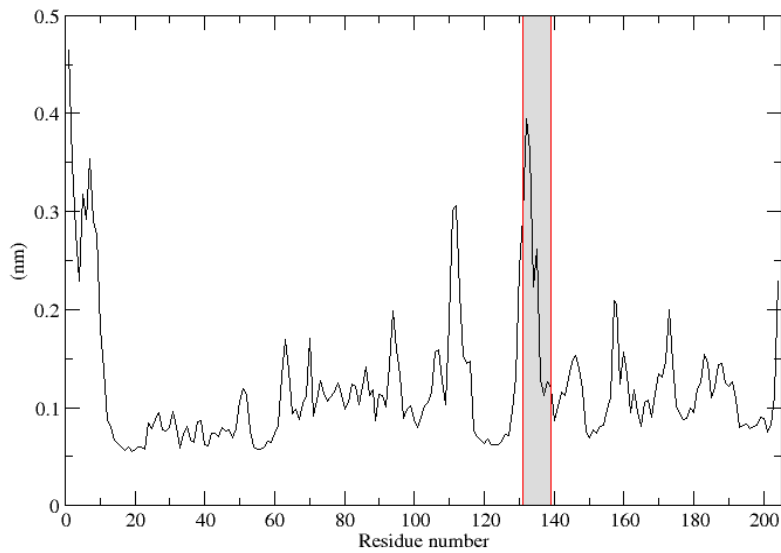

### 1BV1

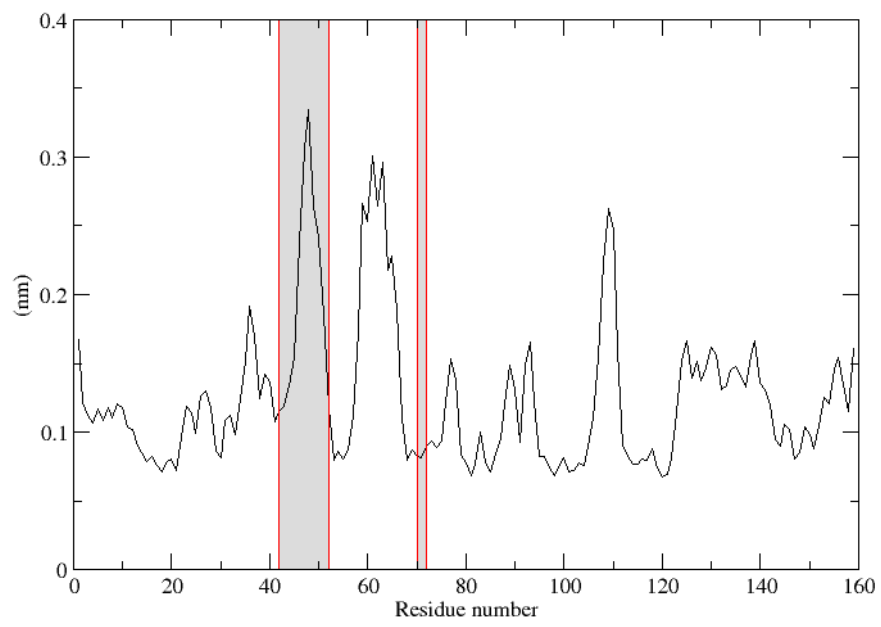

### 1CK4

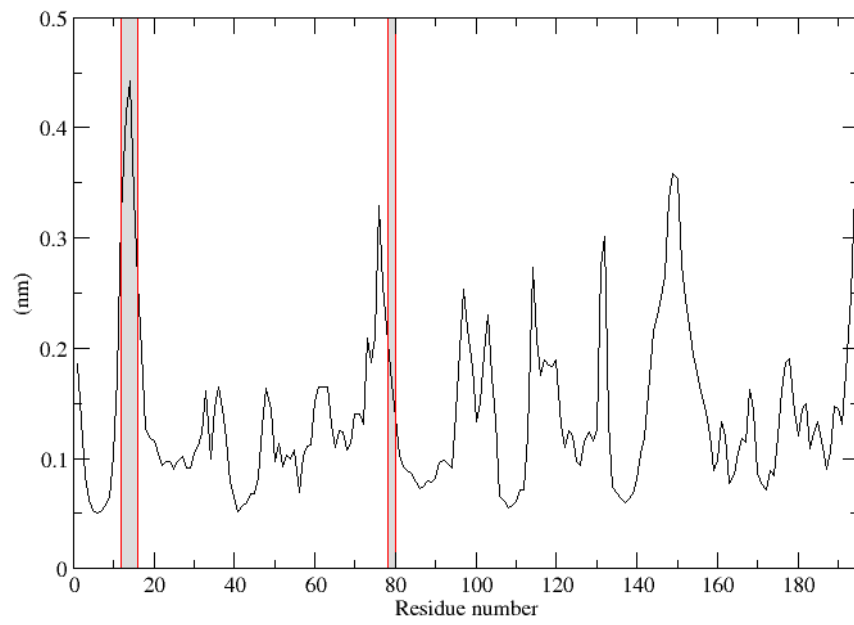

### 1CMW

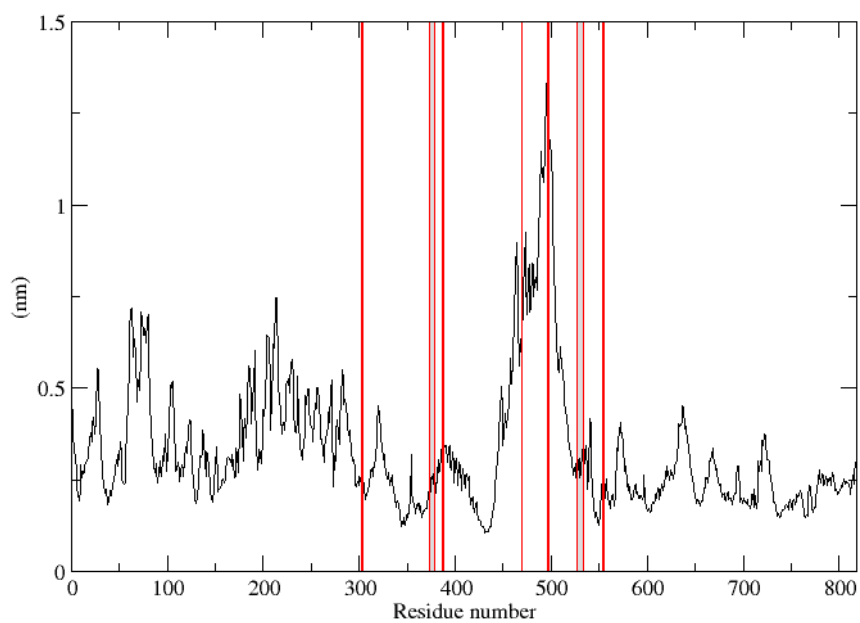

### 1D7P

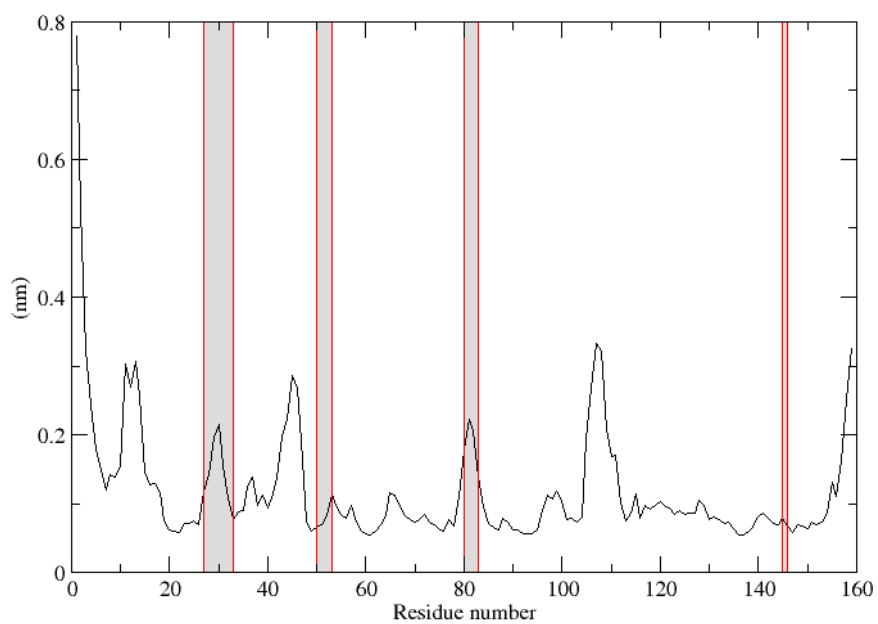

## 1GWP

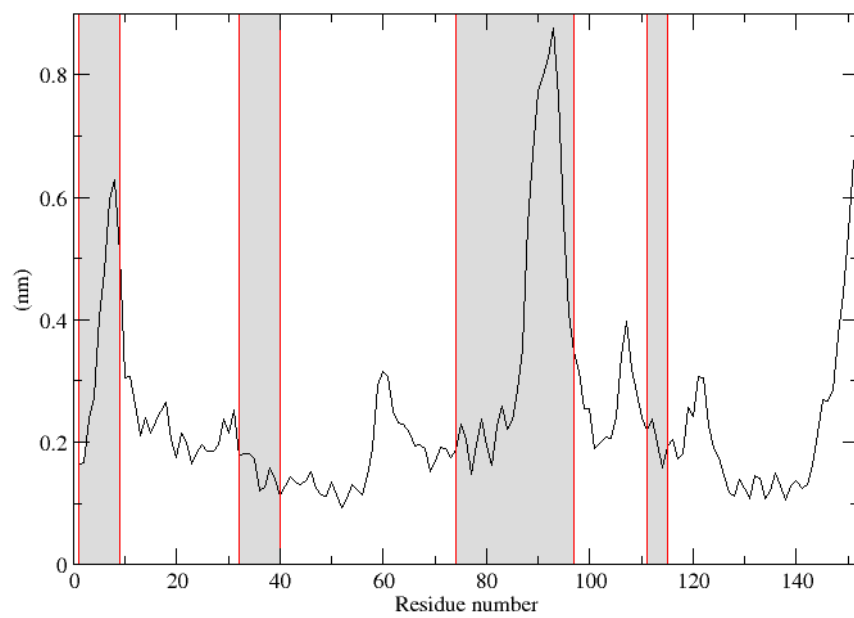

## 1HCN

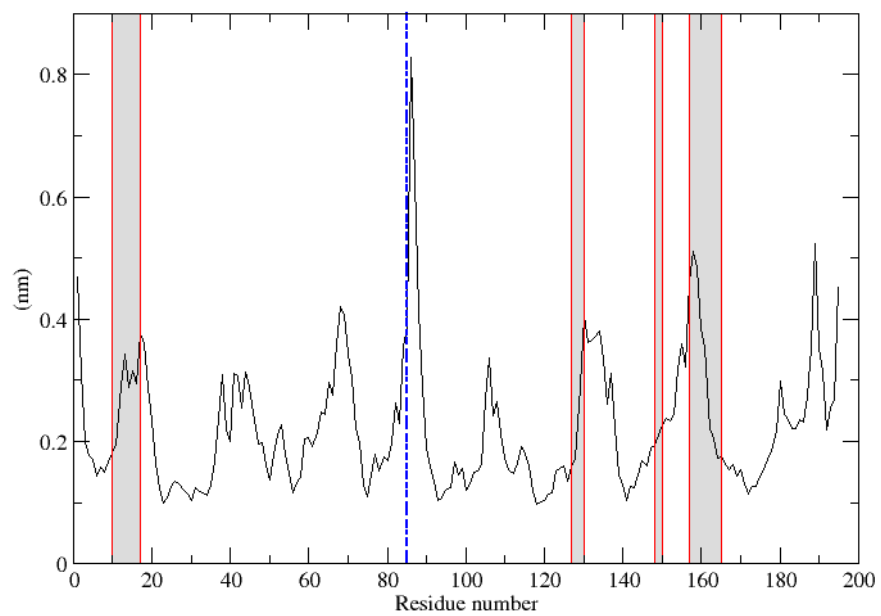

### 1K59

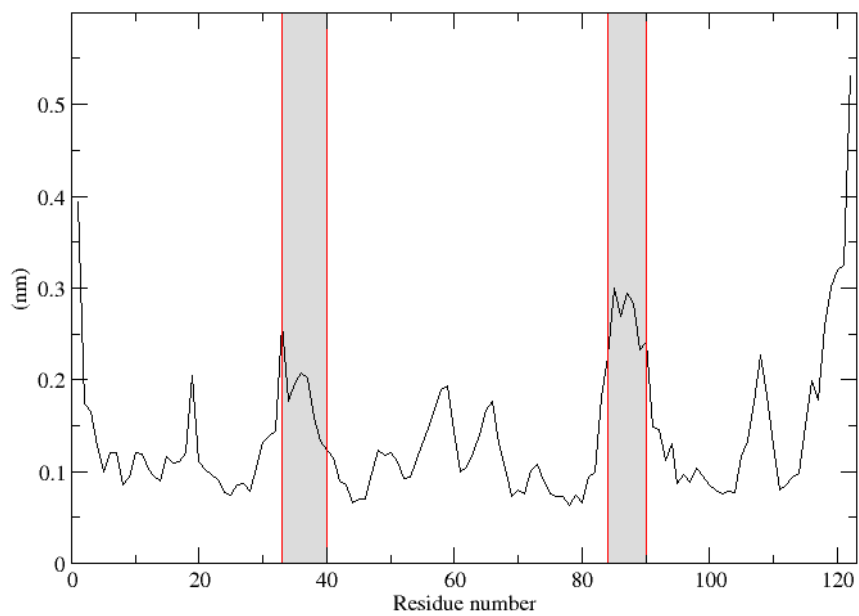

### 1KDC

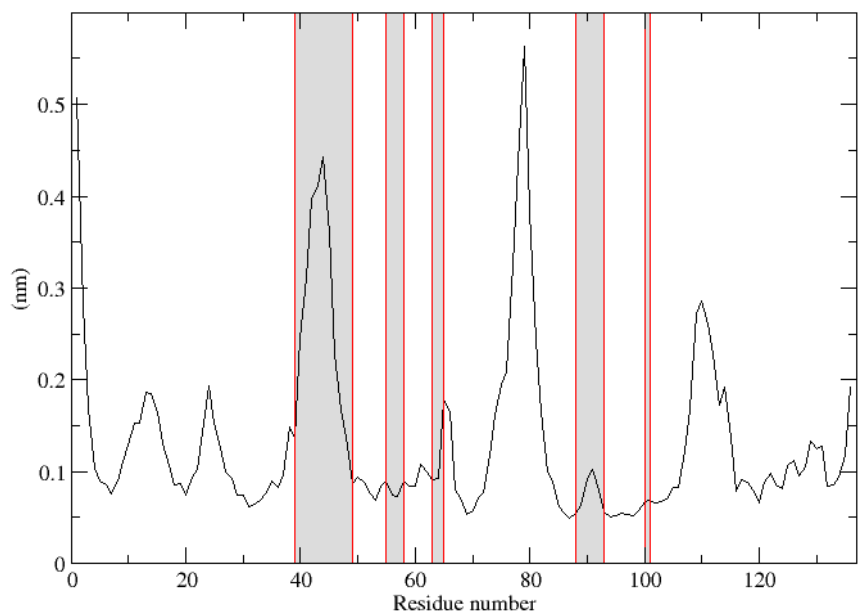

## 1KZQ

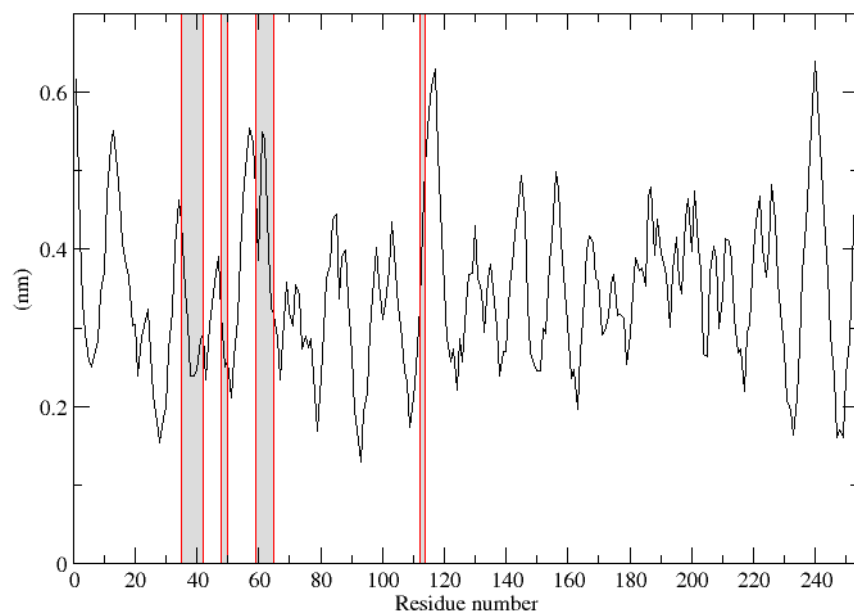

## 1P4P

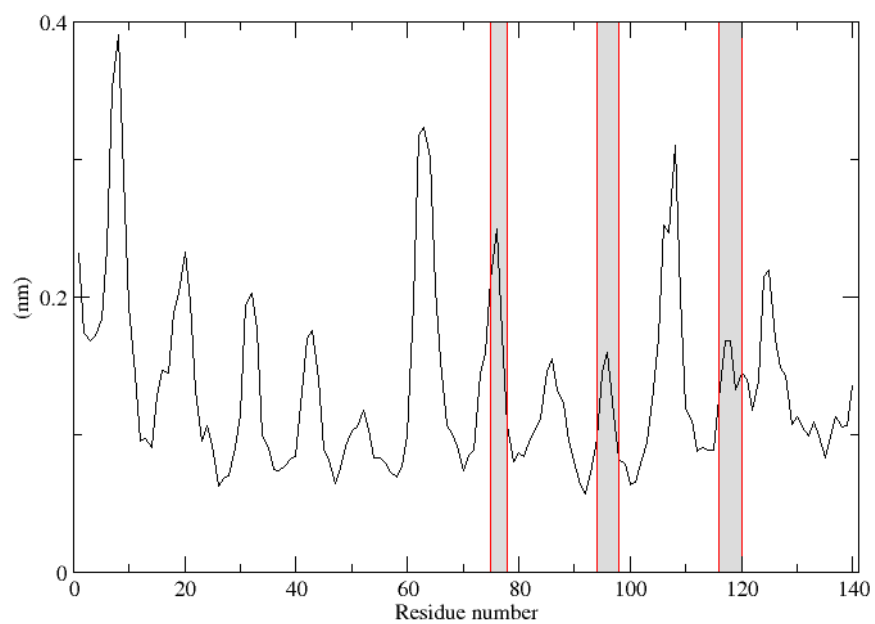



### 1PKO

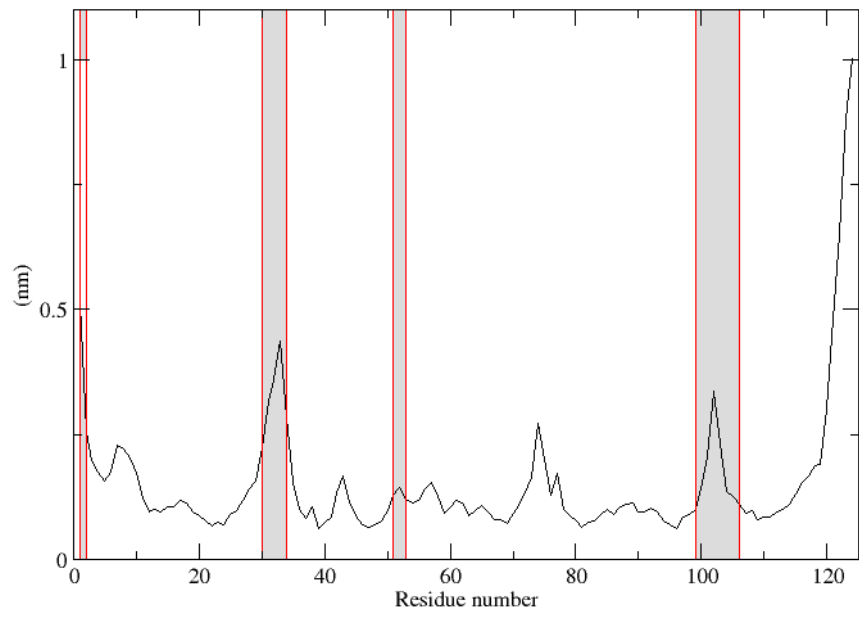

### 1POH

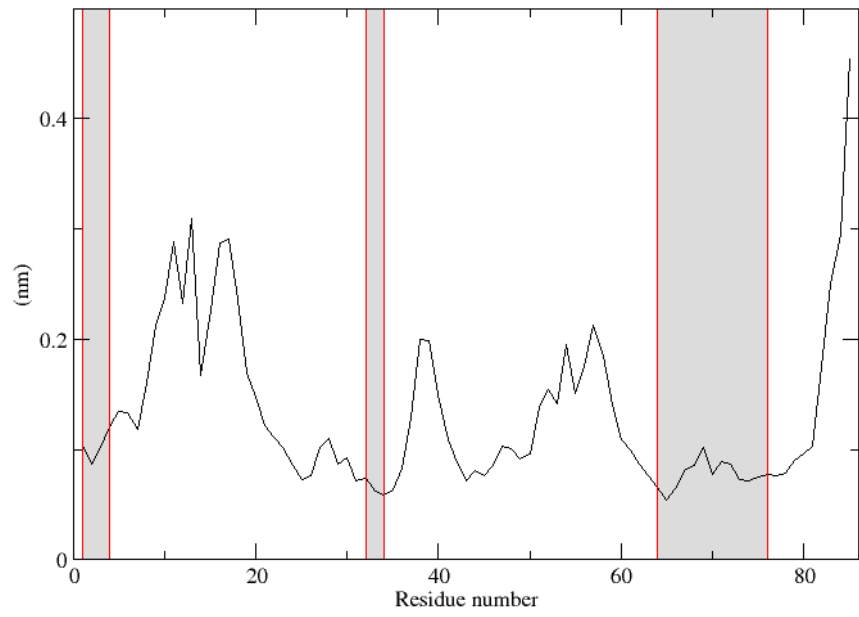

### 1TFH

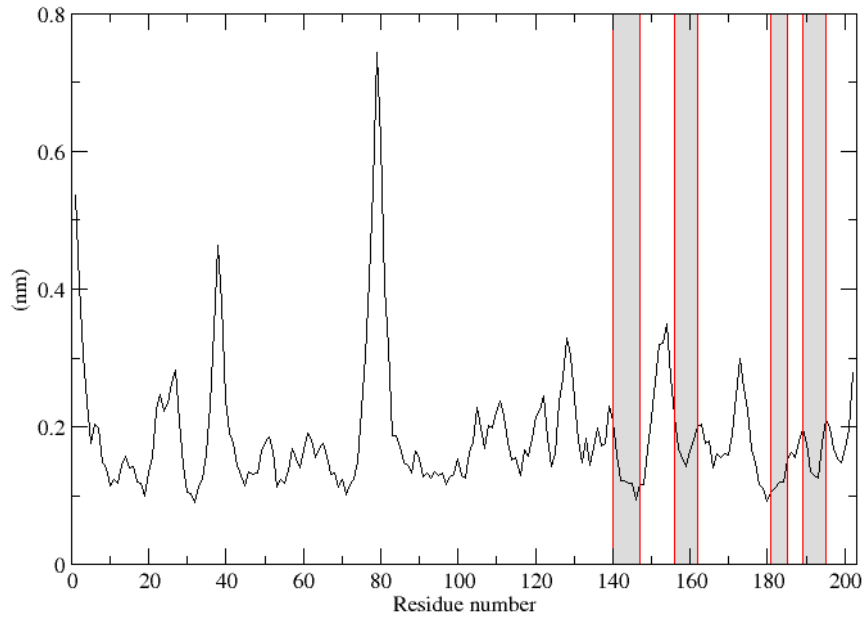

### 1UW3

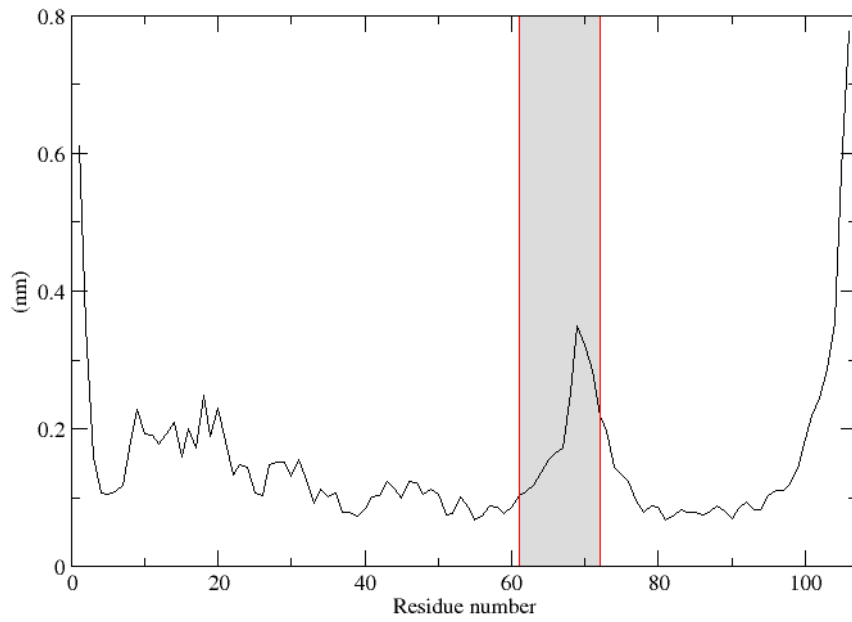

## 2VPF

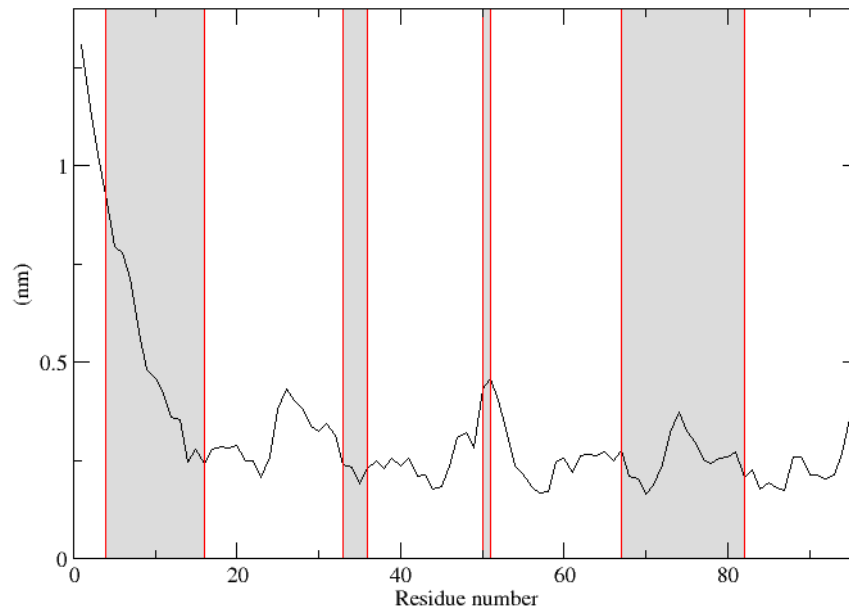

## 3LZT

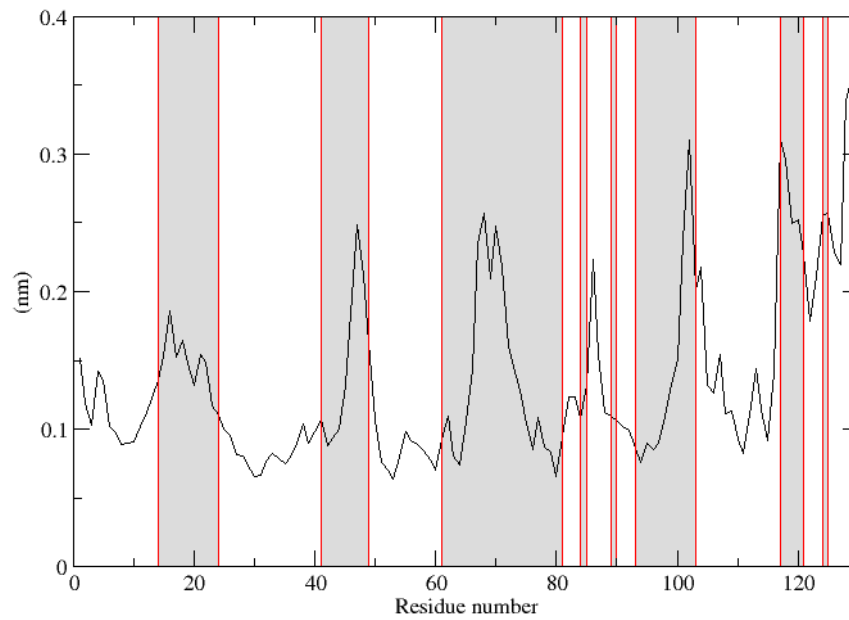

### Normal Mode Analysis.

Fluctuations of the proteins along the first three lowest energy normal modes.

Normal modes were obtained both by using an Elastic Network Model to represent the structure of the protein, as implemented in Suhre K, Sanejouand YH. *Nucleic Acids Res.* 2004 Jul 1;32; and by an all atom representation of the protein as implemented in the Amber program. The results are highly consistent. Herein we are showing the data from the ENM calculations.

Gray Shadings indicate the locations of the epitopes.

Black: First normal mode;

Green: Second normal mode;

Blue: Third normal mode.

### 1A03

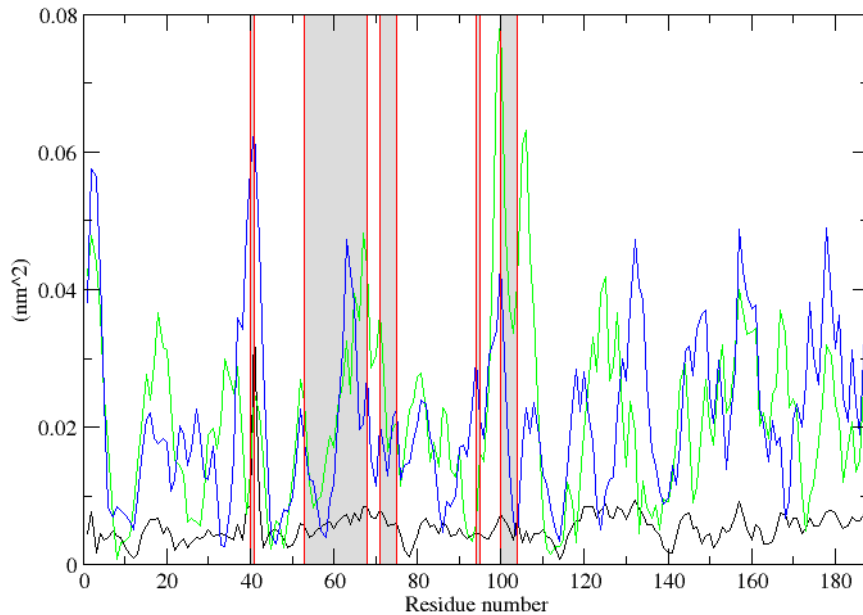

# 1AUQ

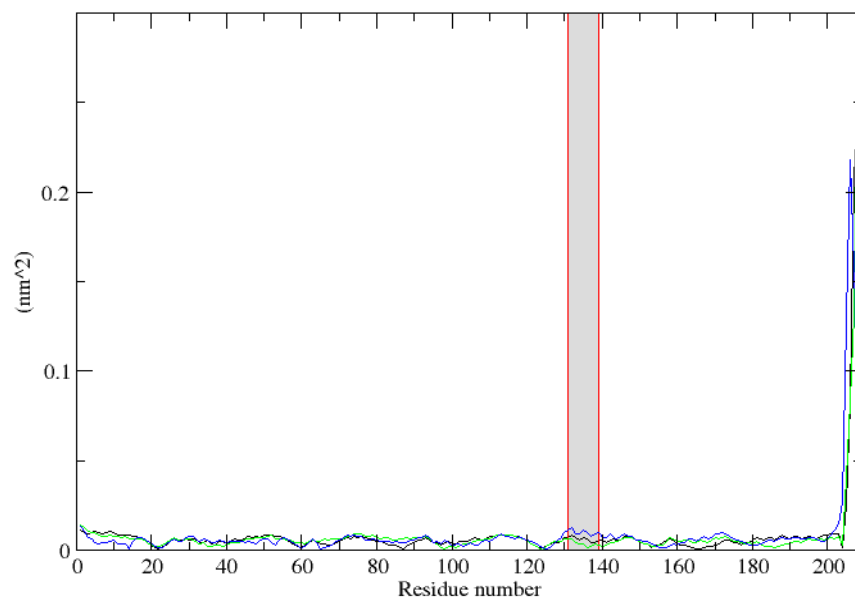

# 1BV1

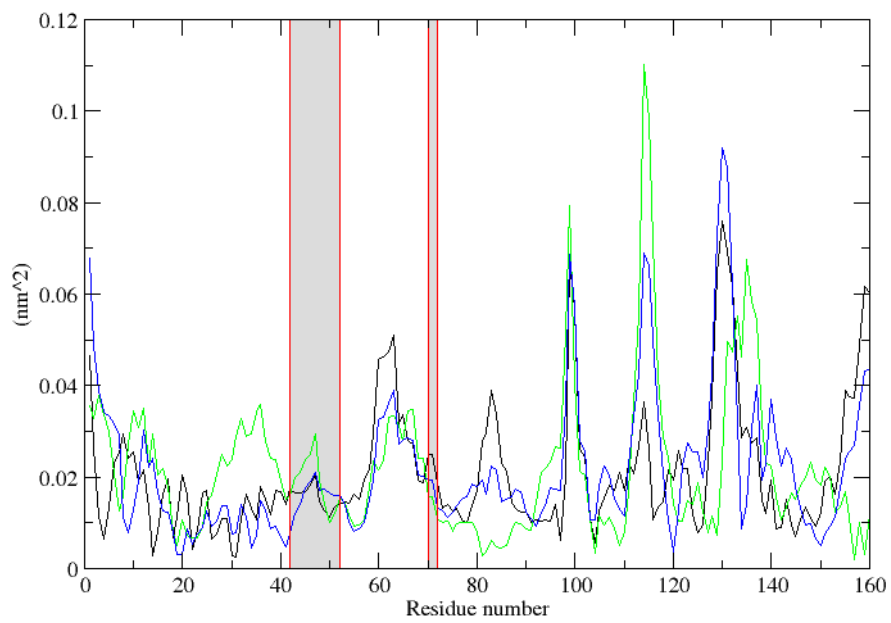

### 1CK4

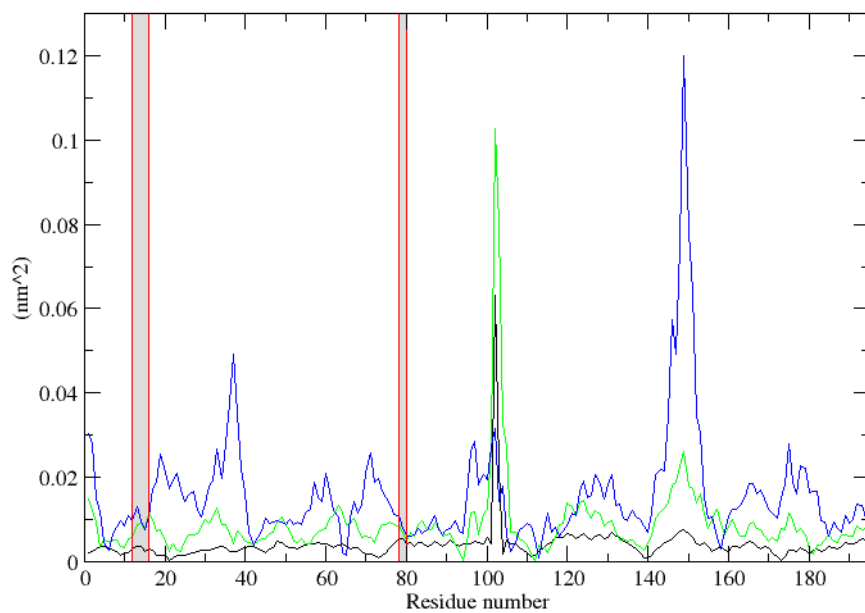

### 1CMW

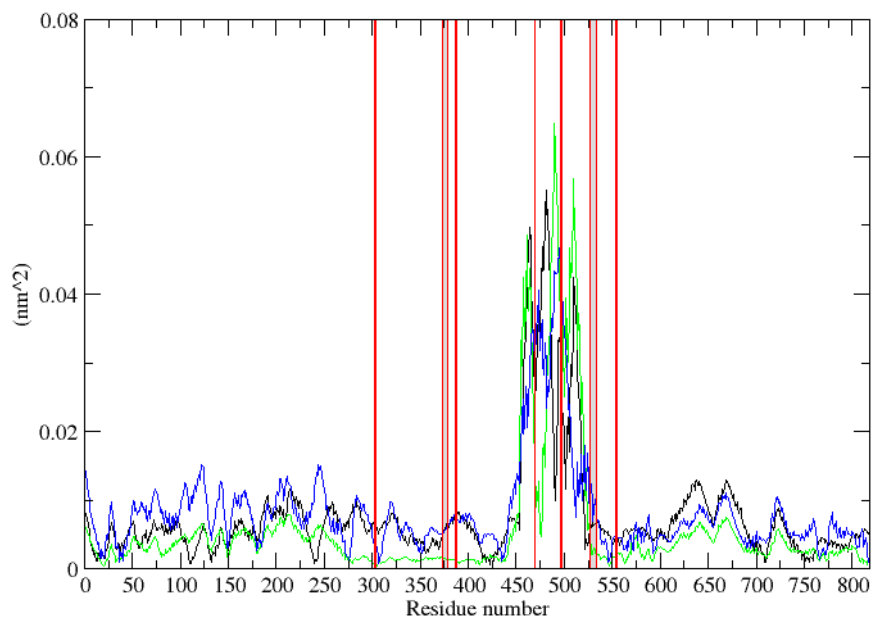

### 1D7P

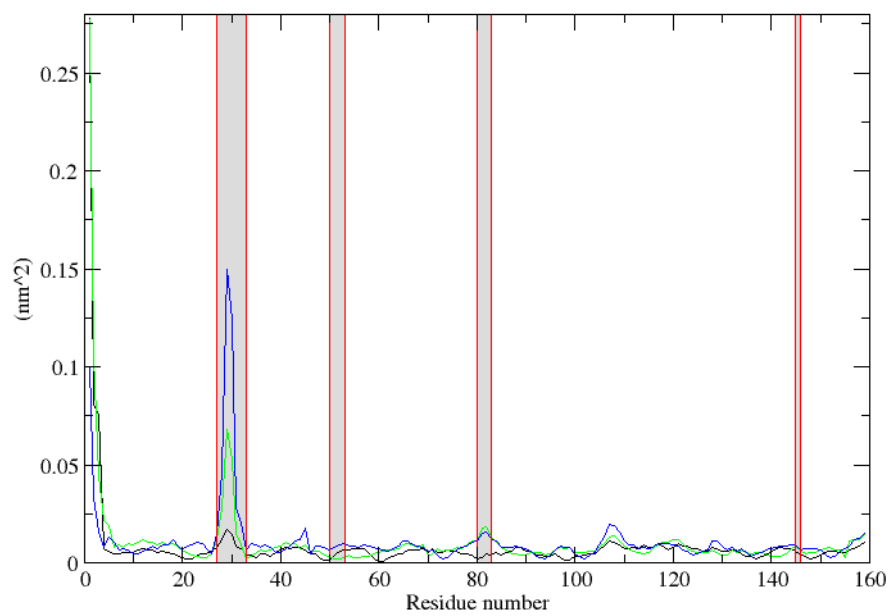

### 1GWP

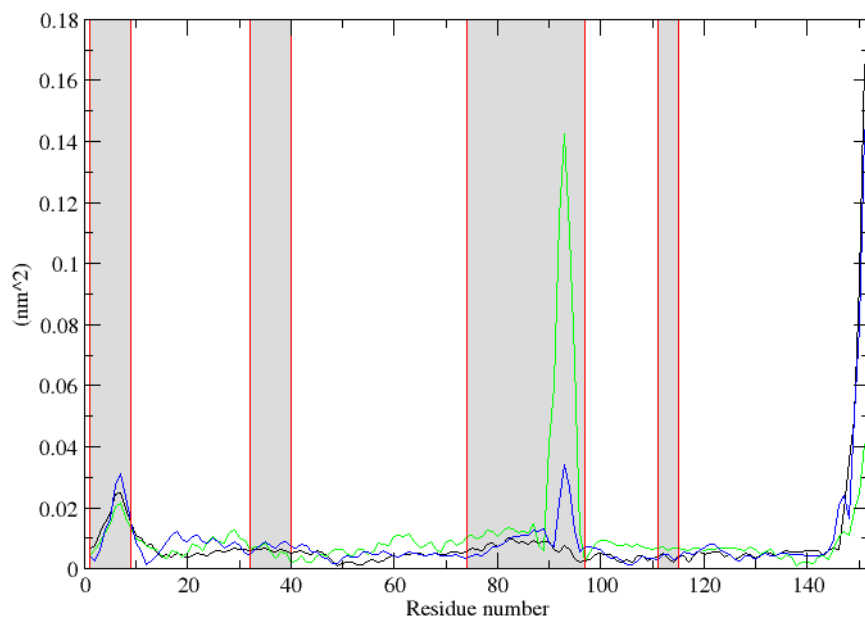

### 1HCN

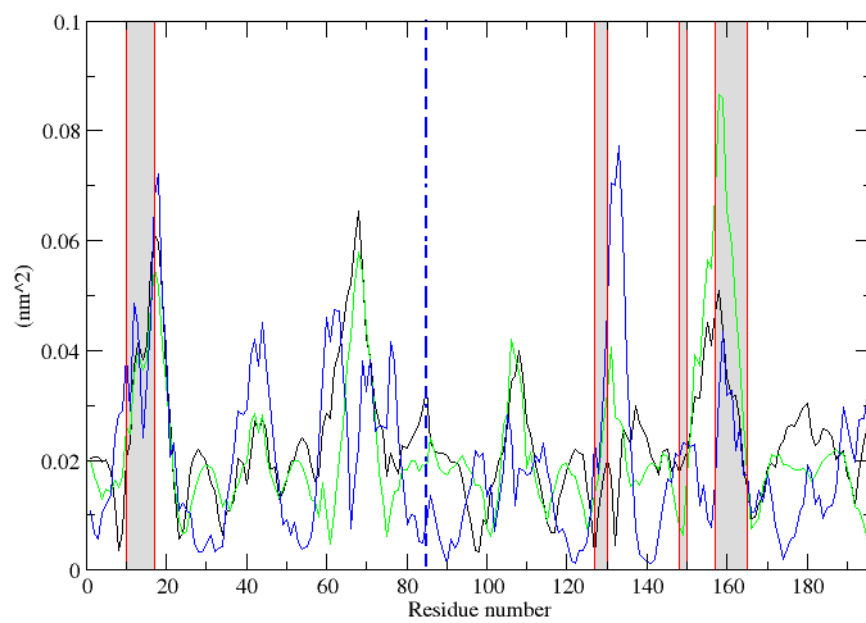

### 1K59

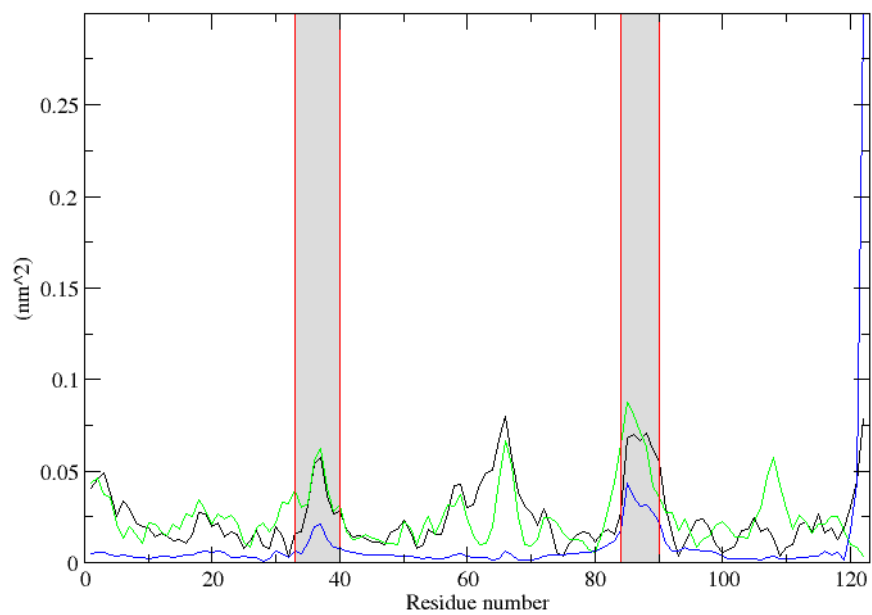



### 1KDC

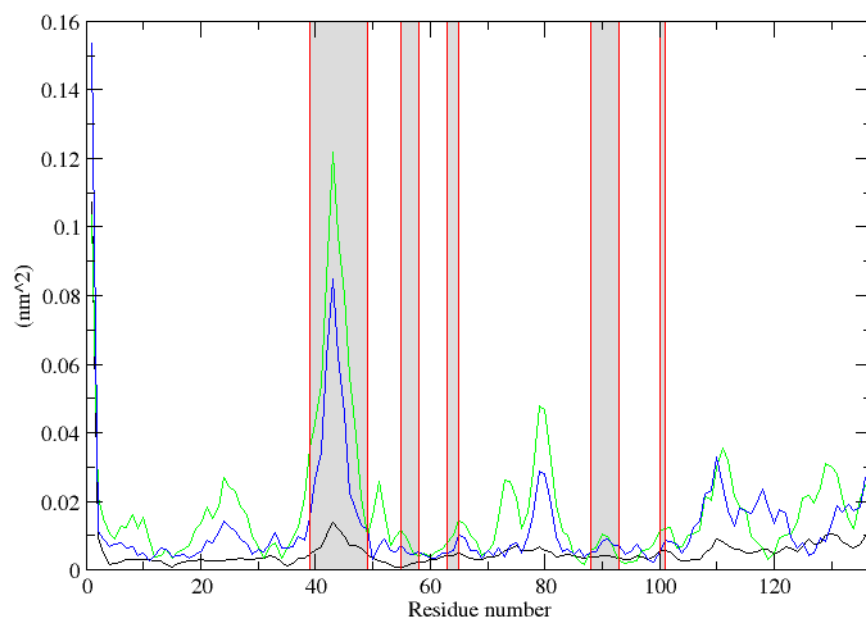

### 1KZQ

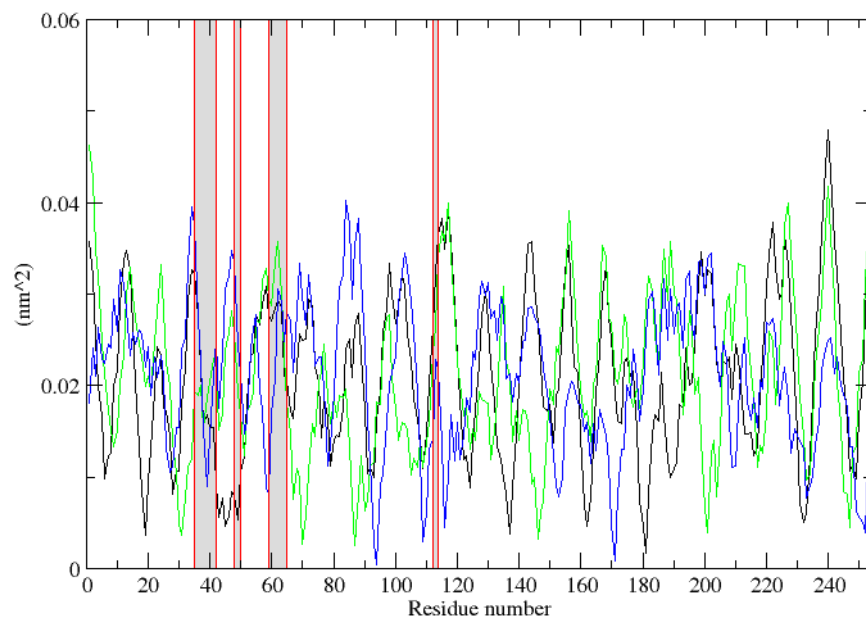

### 1P4P

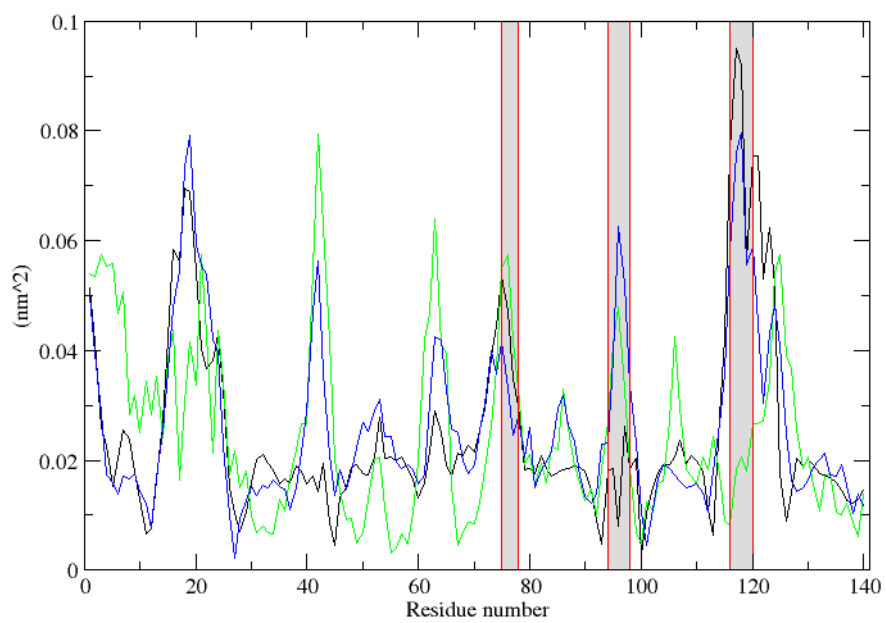

### 1PKO

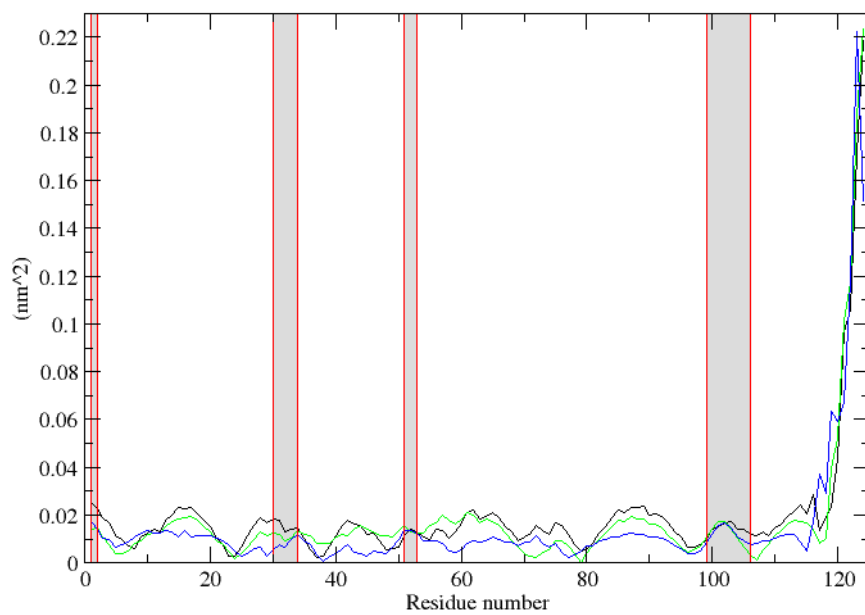

# 1POH

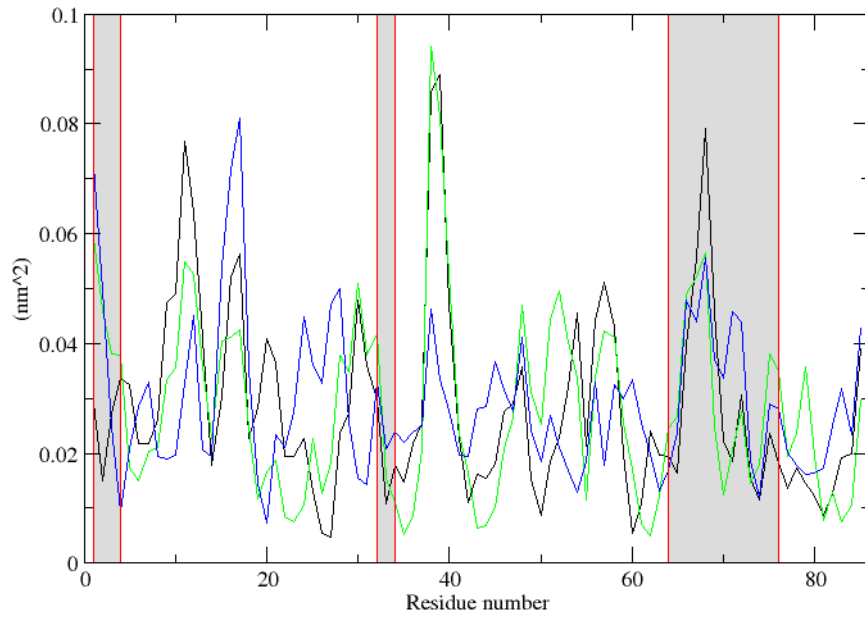

# 1TFH

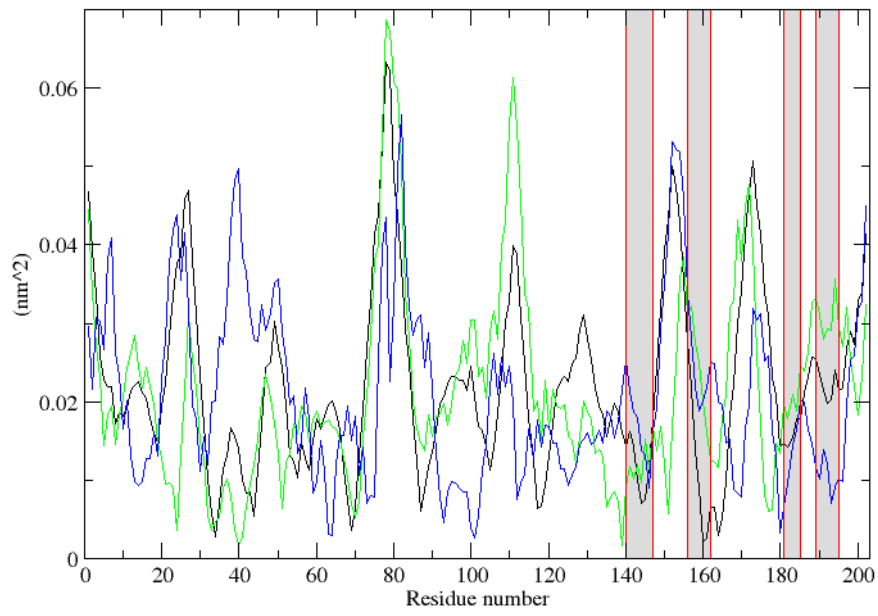

### 1UW3

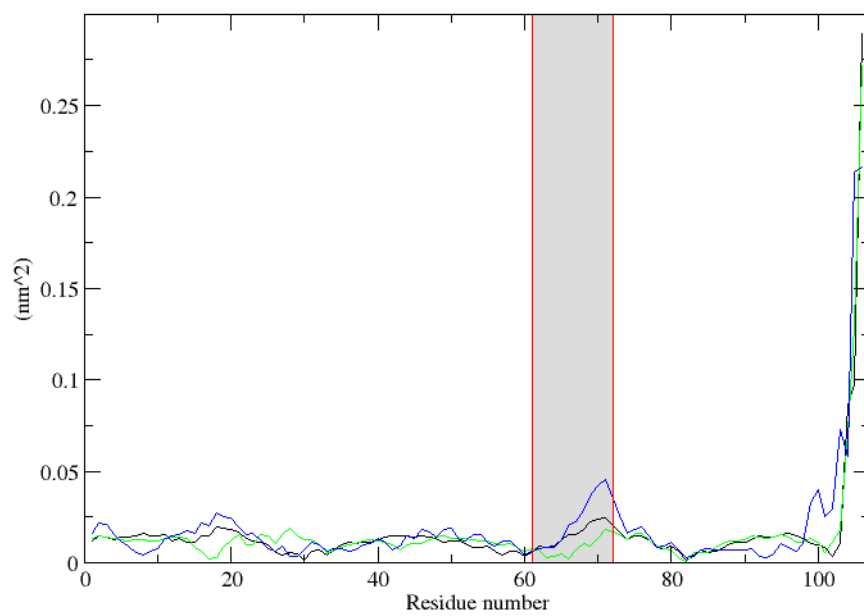

### 2VPF

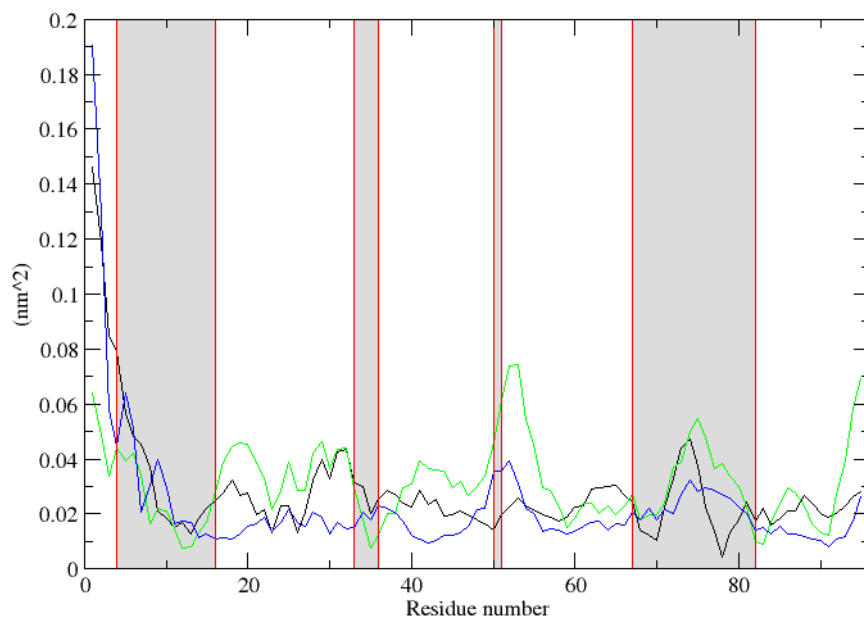

### 3LZT

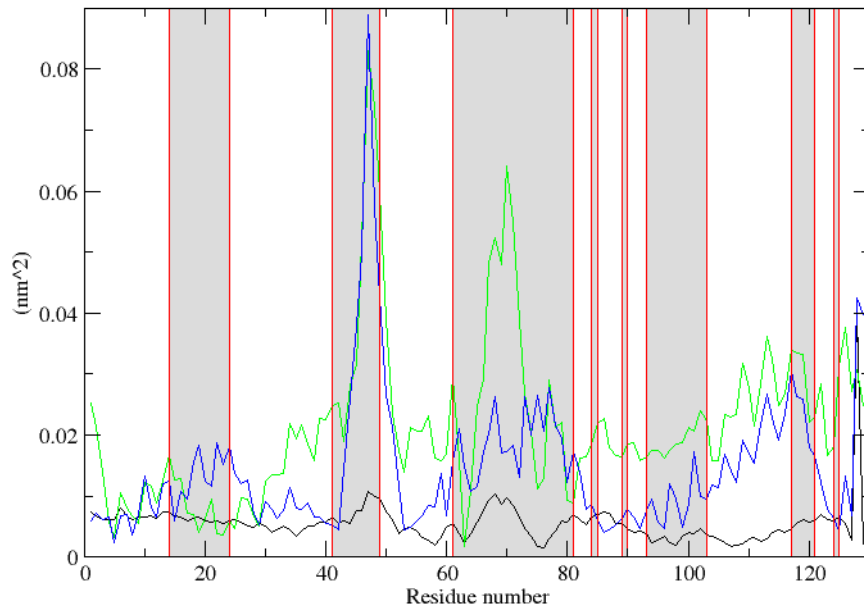

### 7NN9

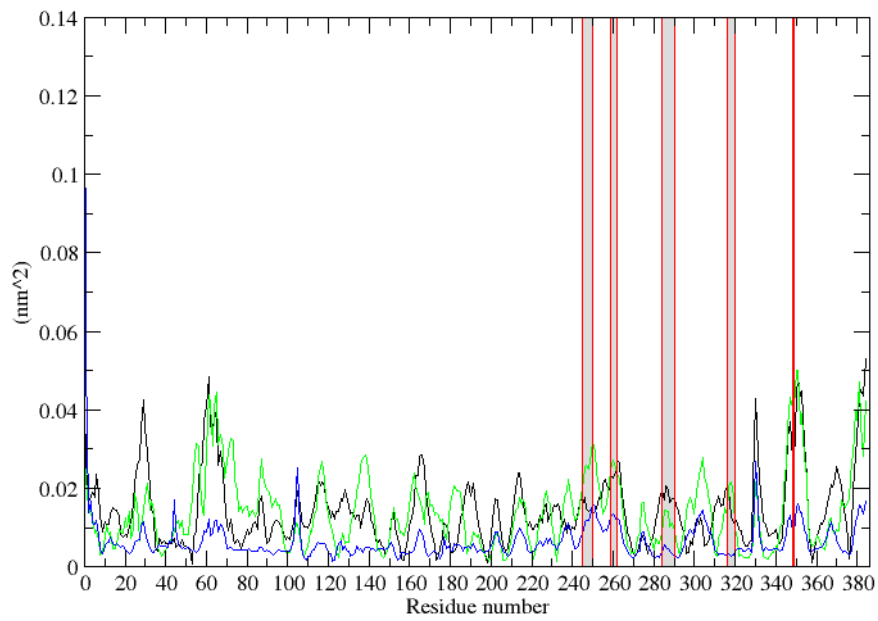

### Residue-Residue Cross-Correlation Matrices

The matrices reported in the following are color-coded according to the degree of cross-correlation between any two residues in the sequence. Blue lines highlight epitope regions. For each antigen, we have reported two representation of the matrix. The top one represents the whole protein. The bottom one is all blurred except for the cross-correlations involving epitope regions. This representation has been added for clarity. It is apparent that no specific dynamic signal differentiates epitope from non-epitope sequences.

**1AO3**

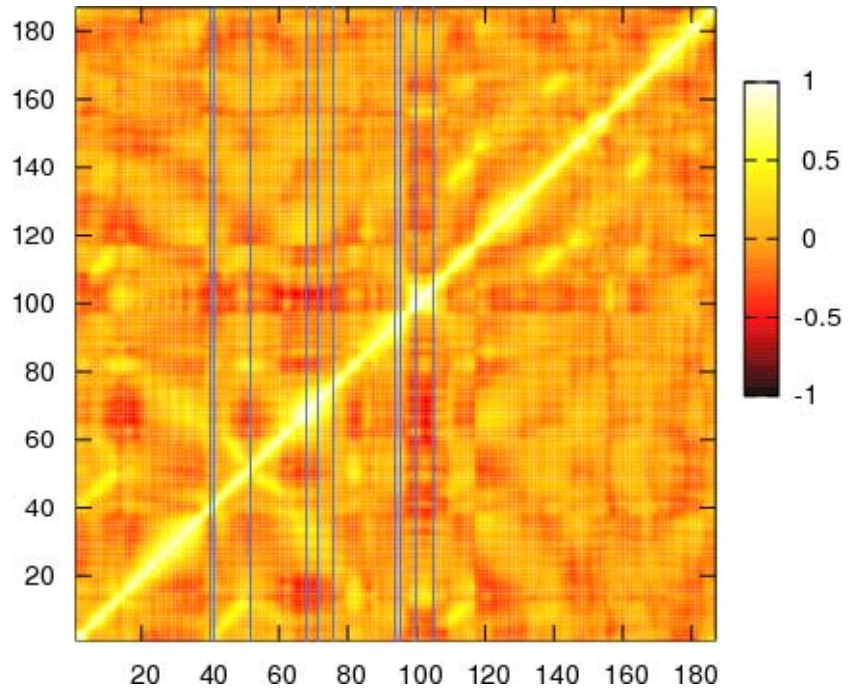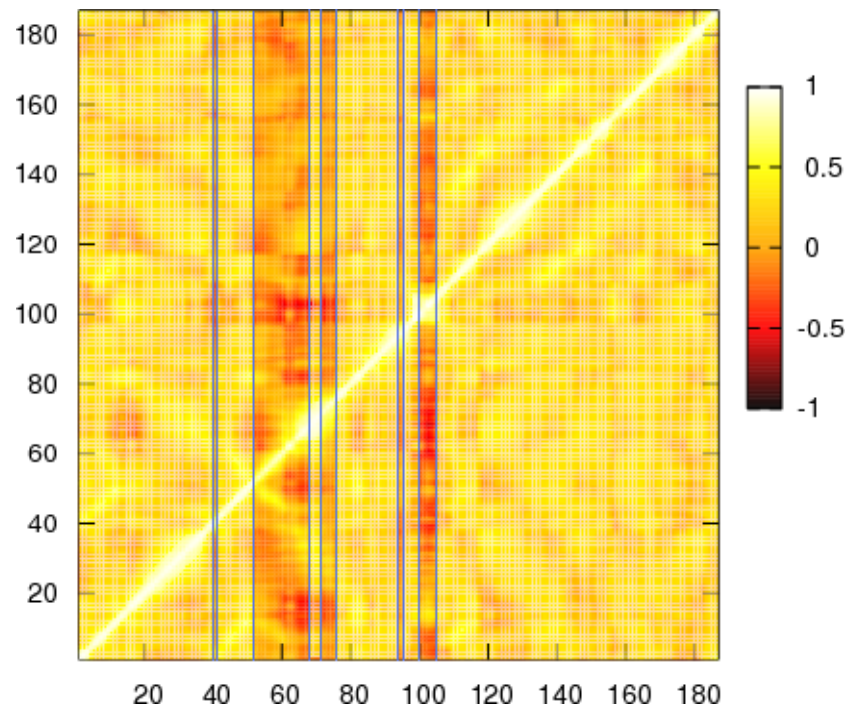

# 1AUQ

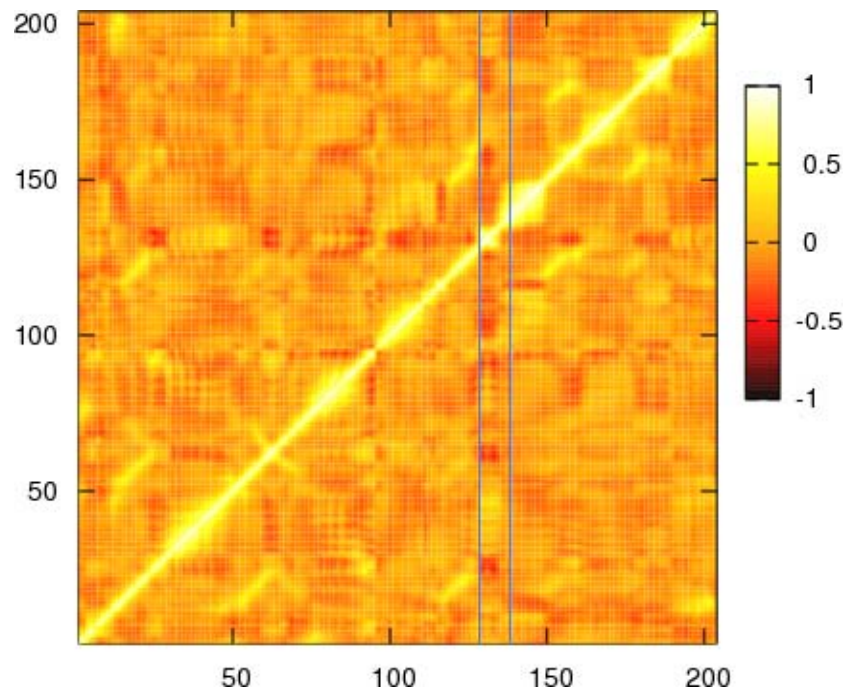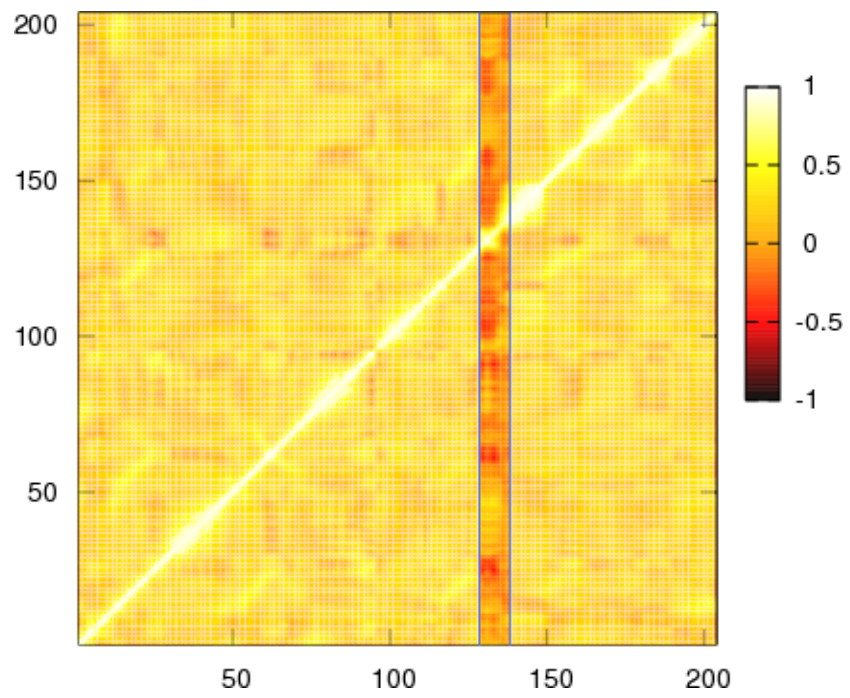



# 1BV1

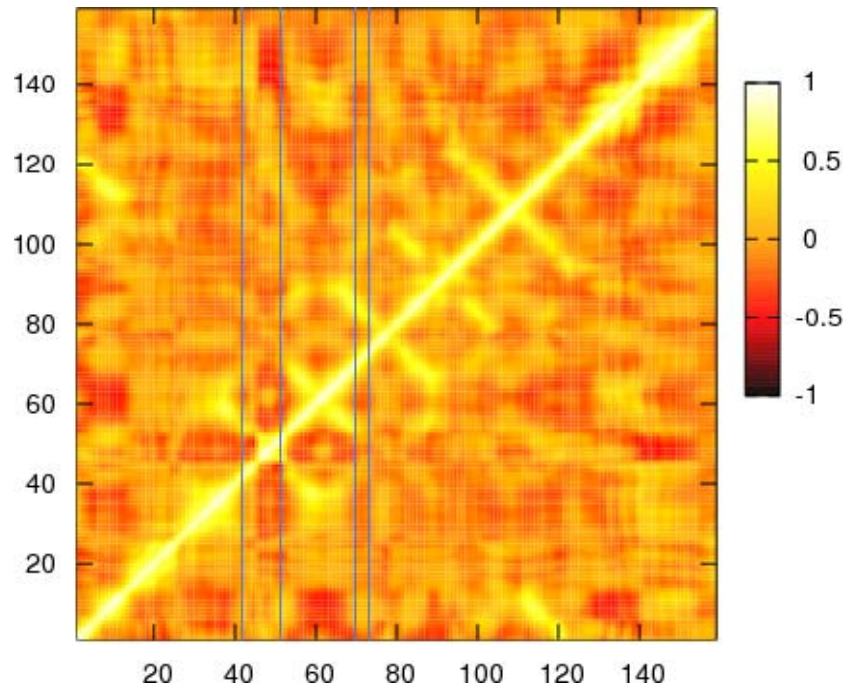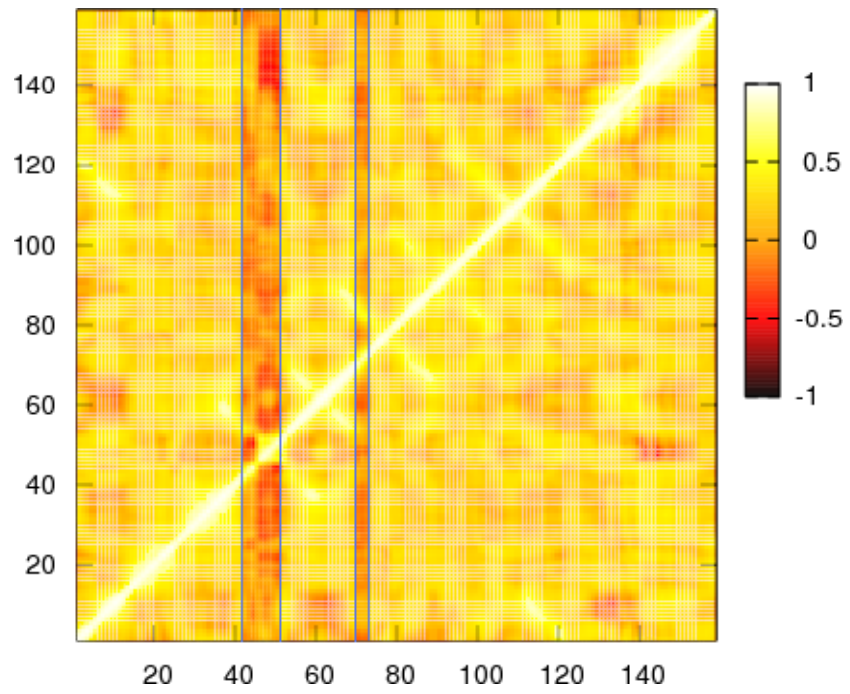



# 1CK4

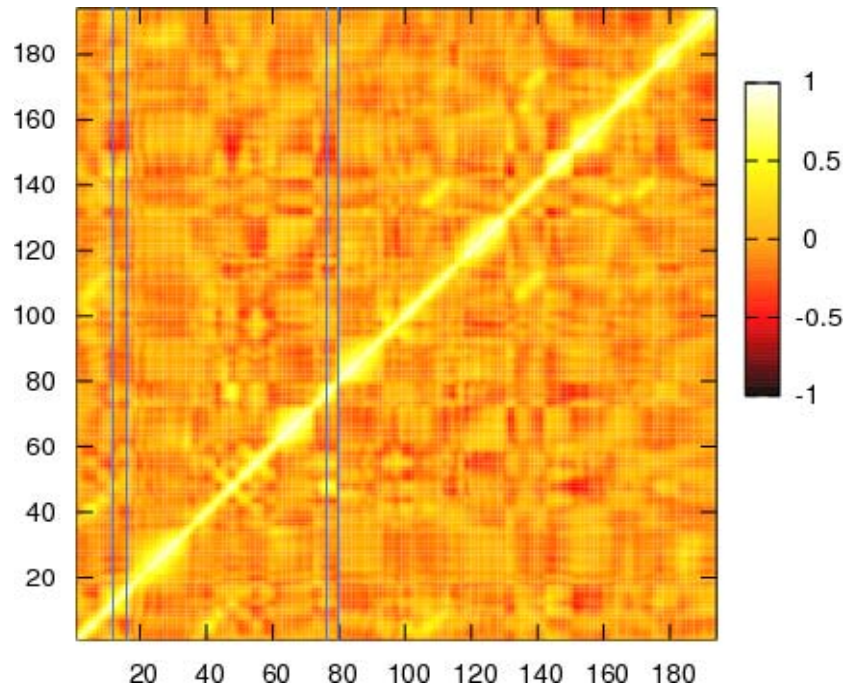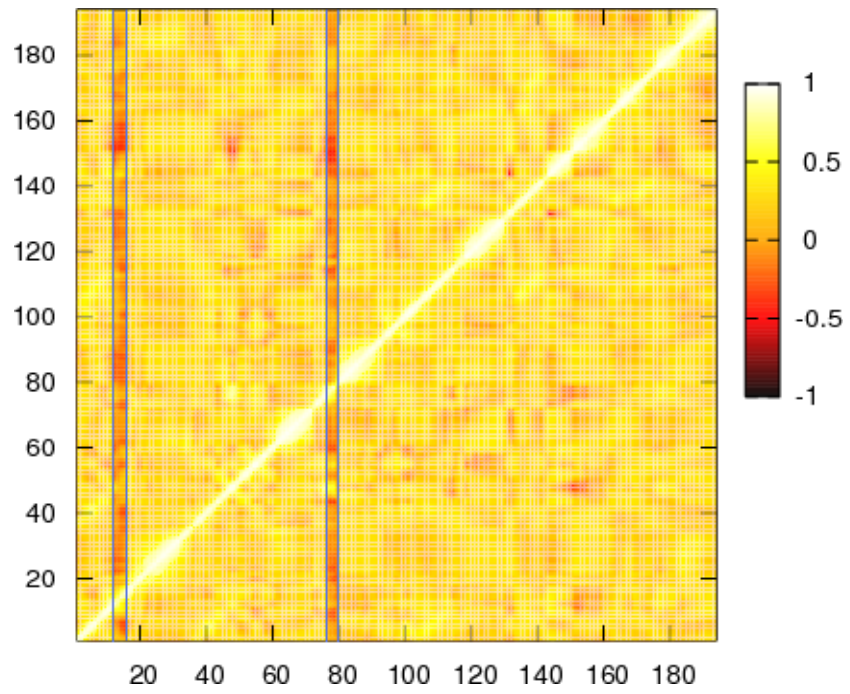

### 1CMW

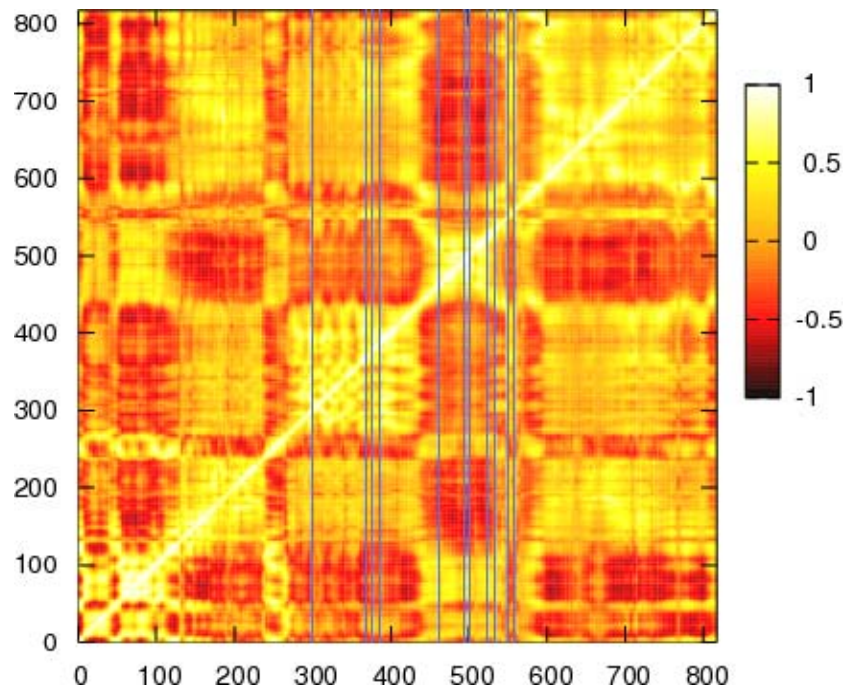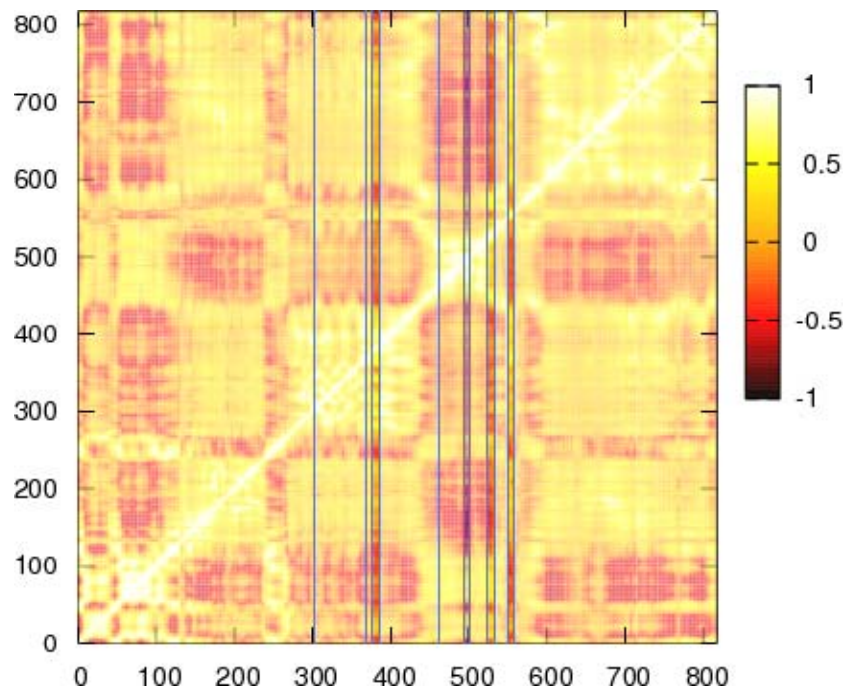

### 1D7P

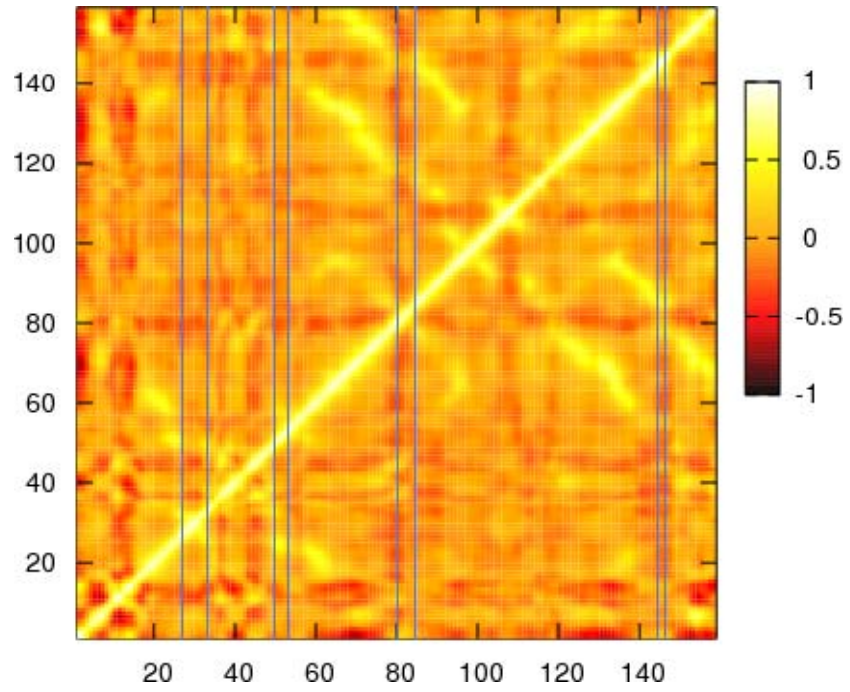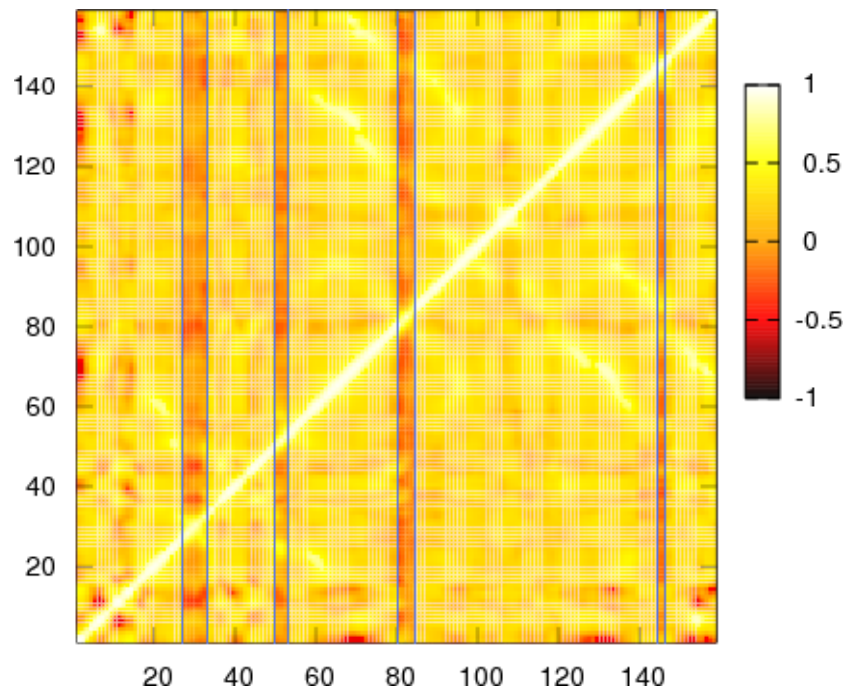



# 1GWP

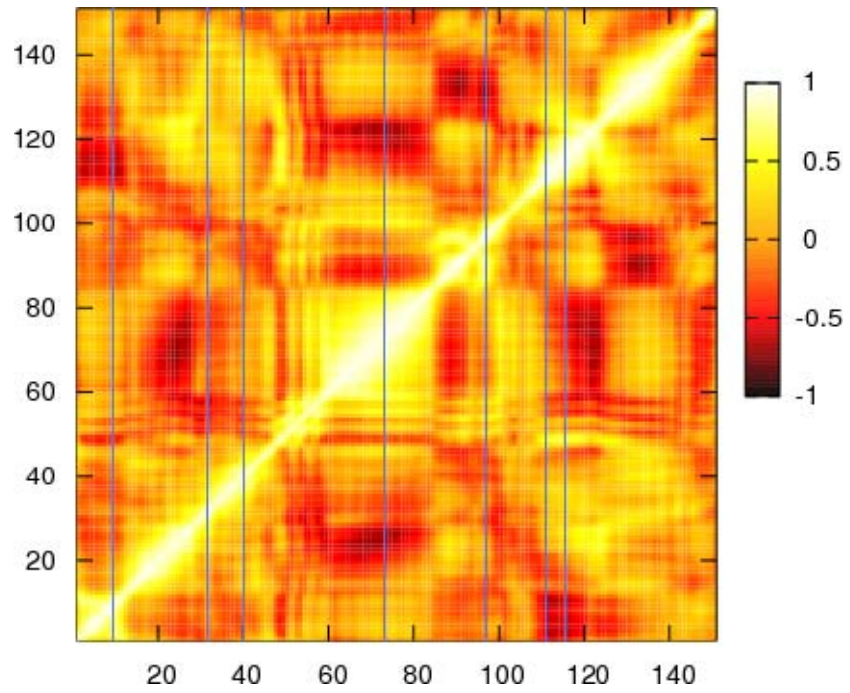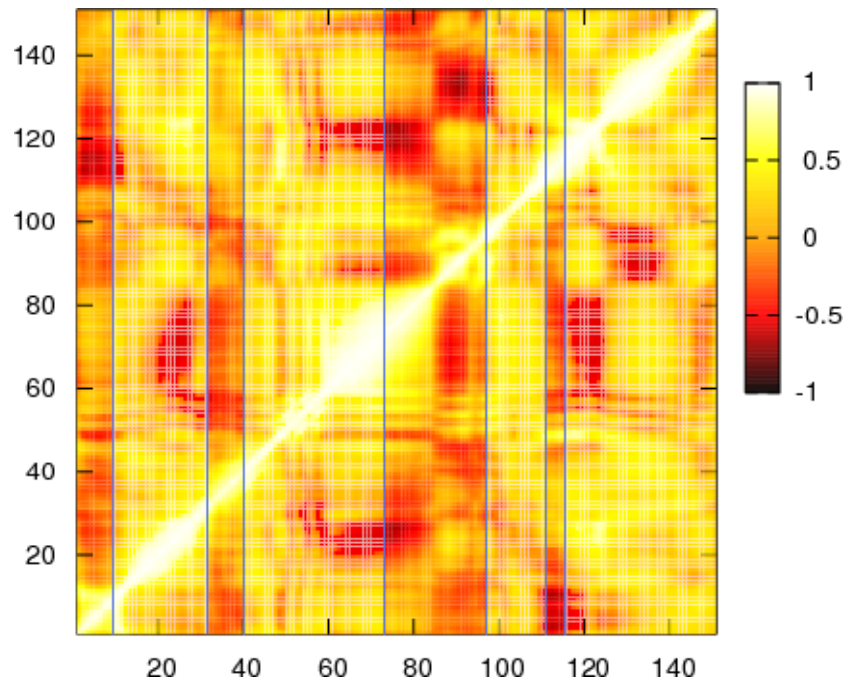

# IHCN

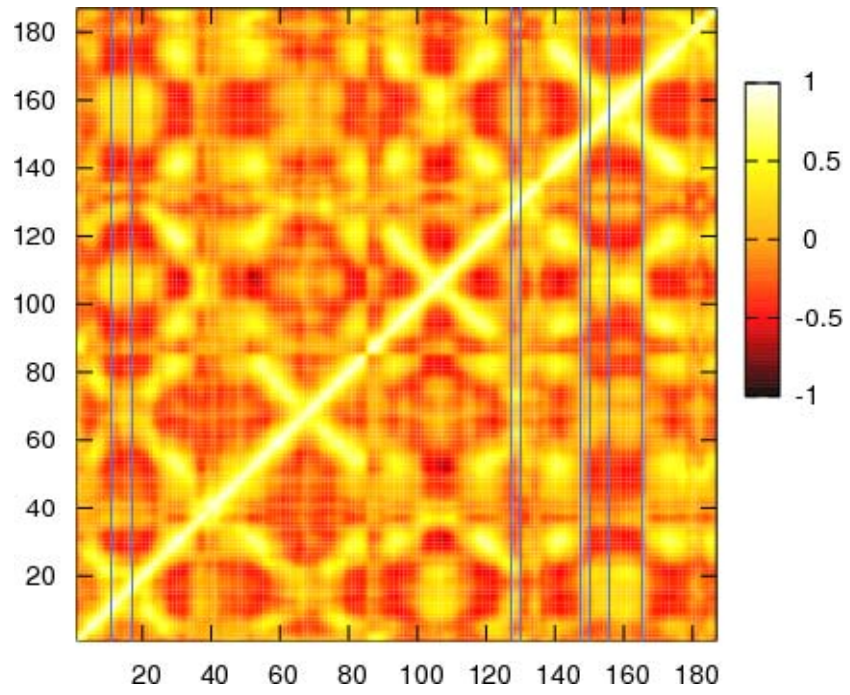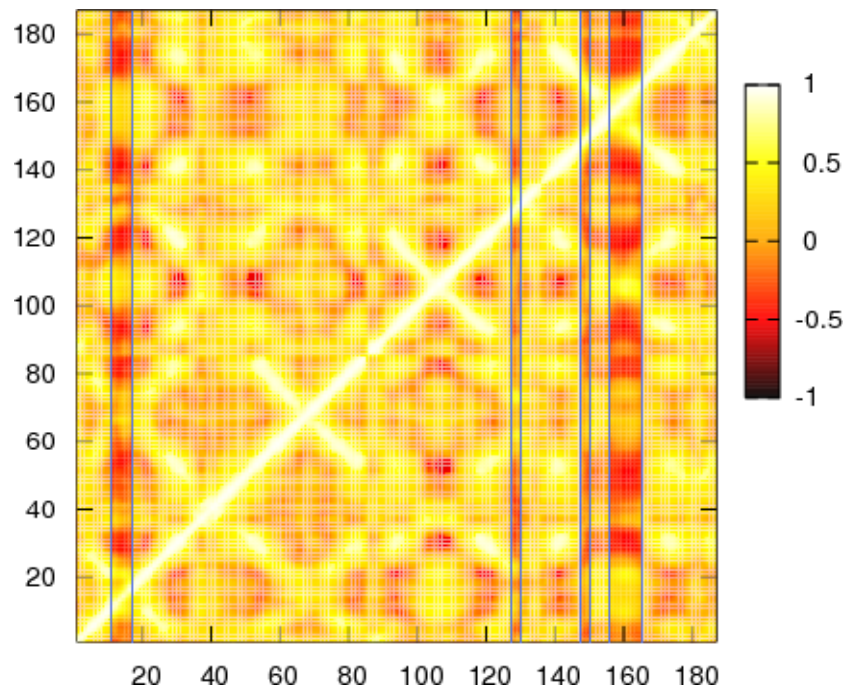

**1K59**

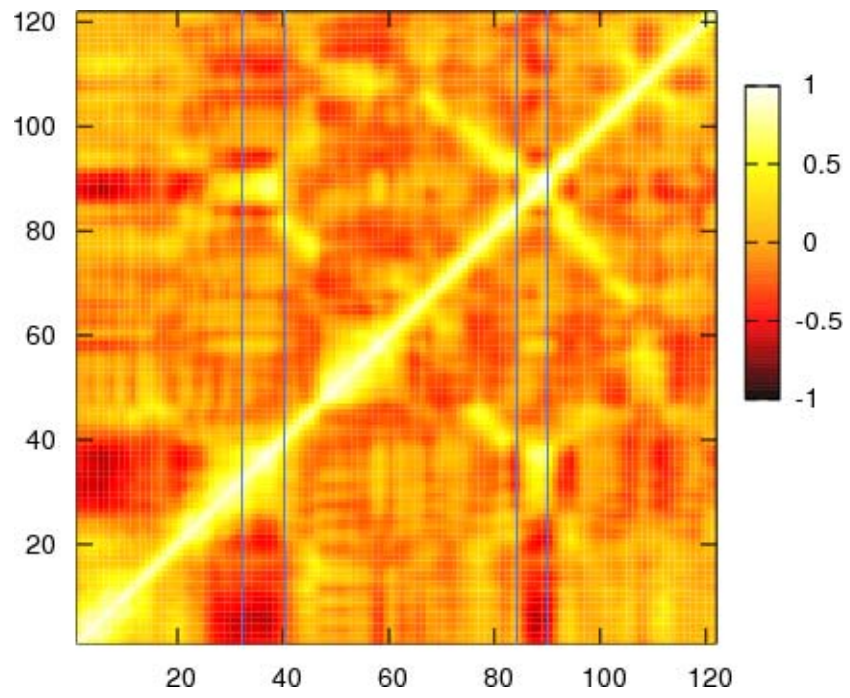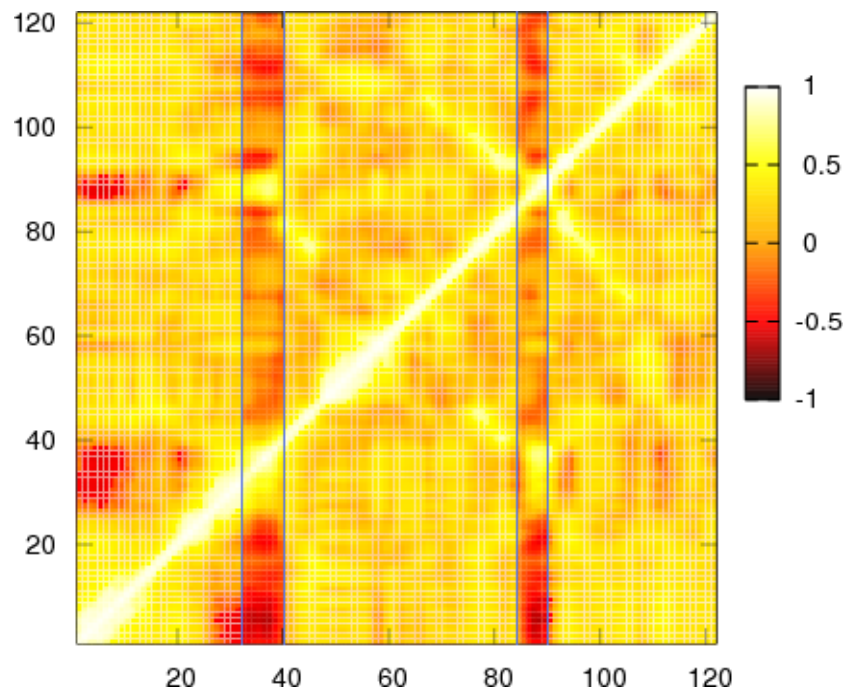

**1KDC**



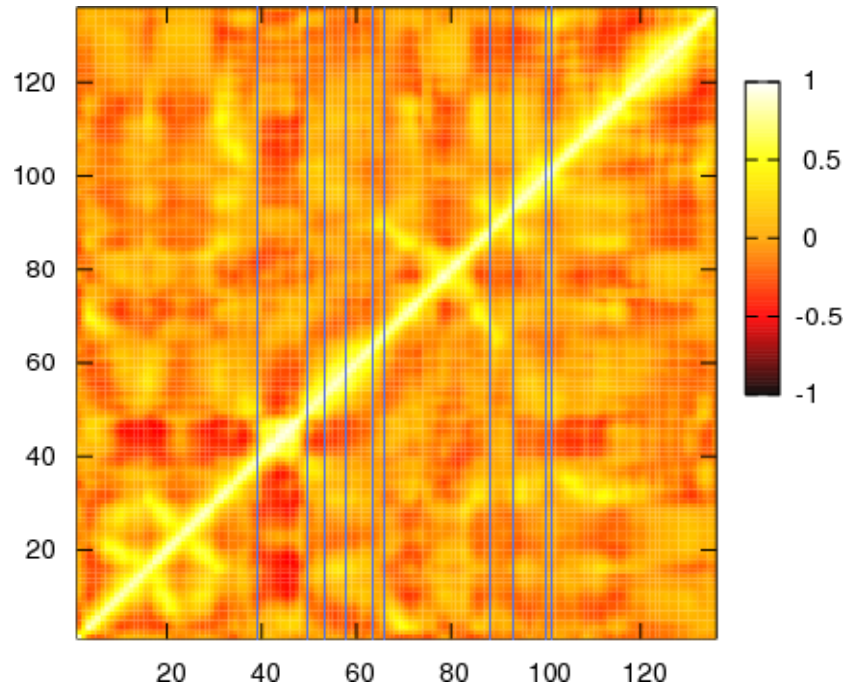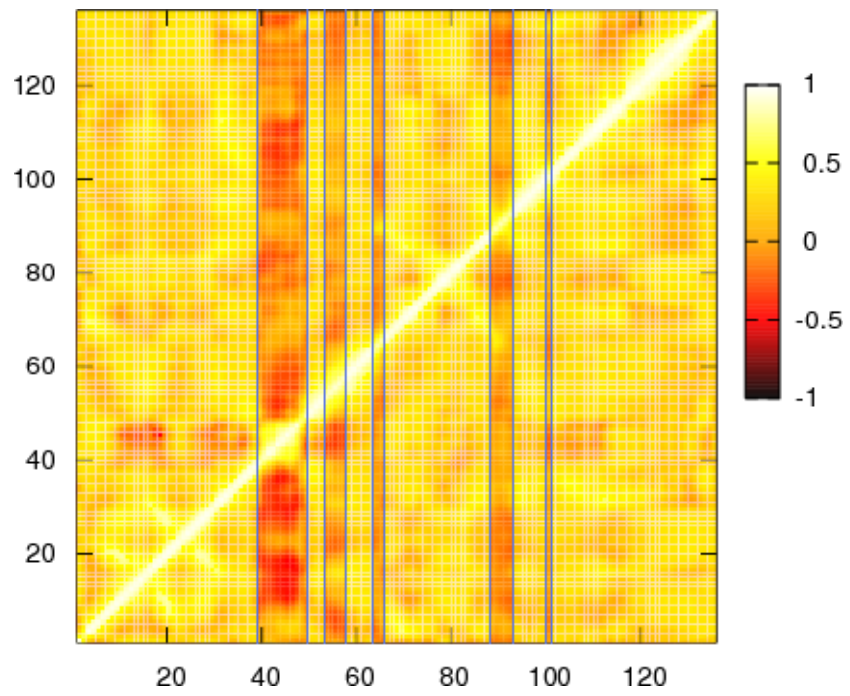

# 1KZQ

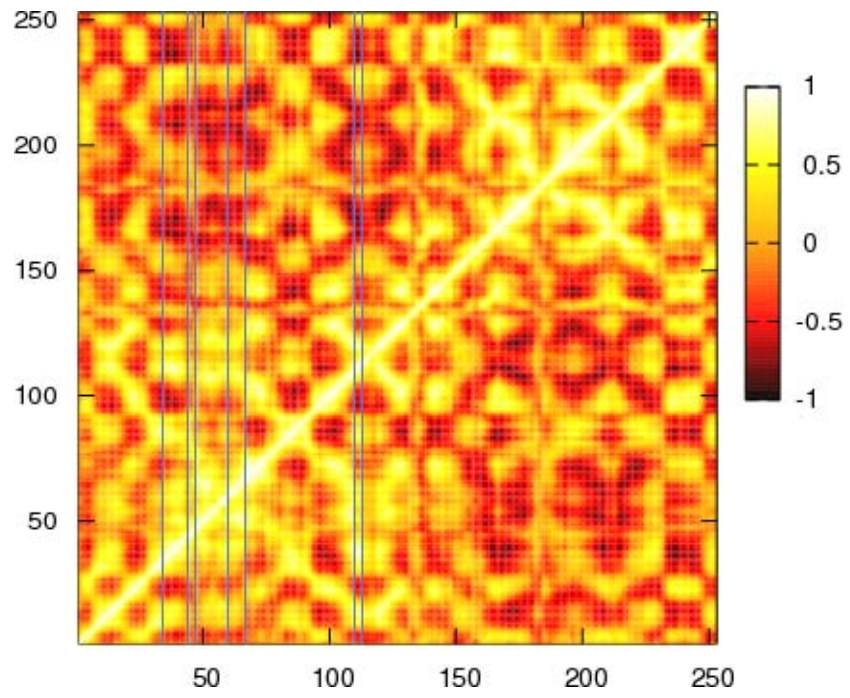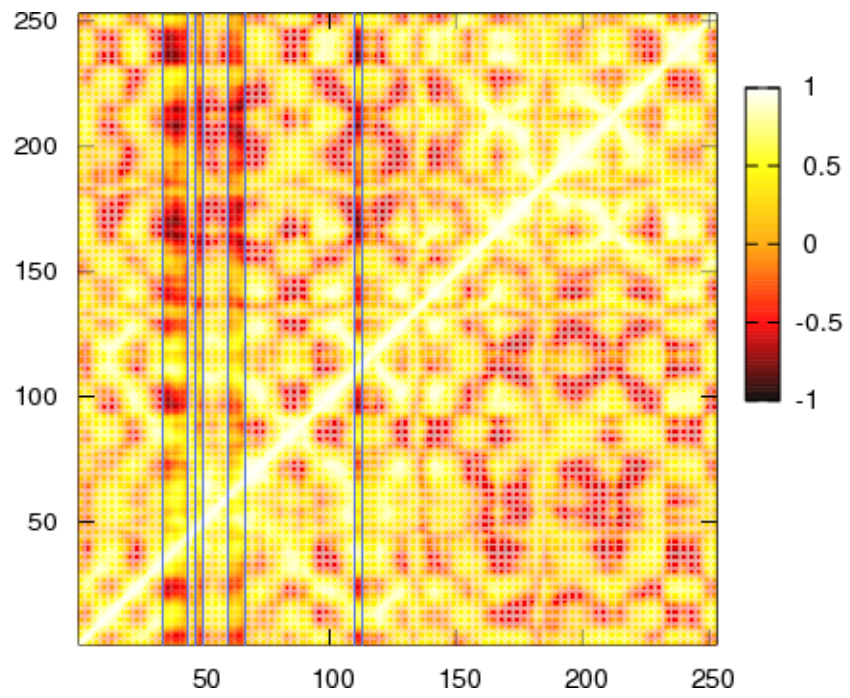



### 1P4P

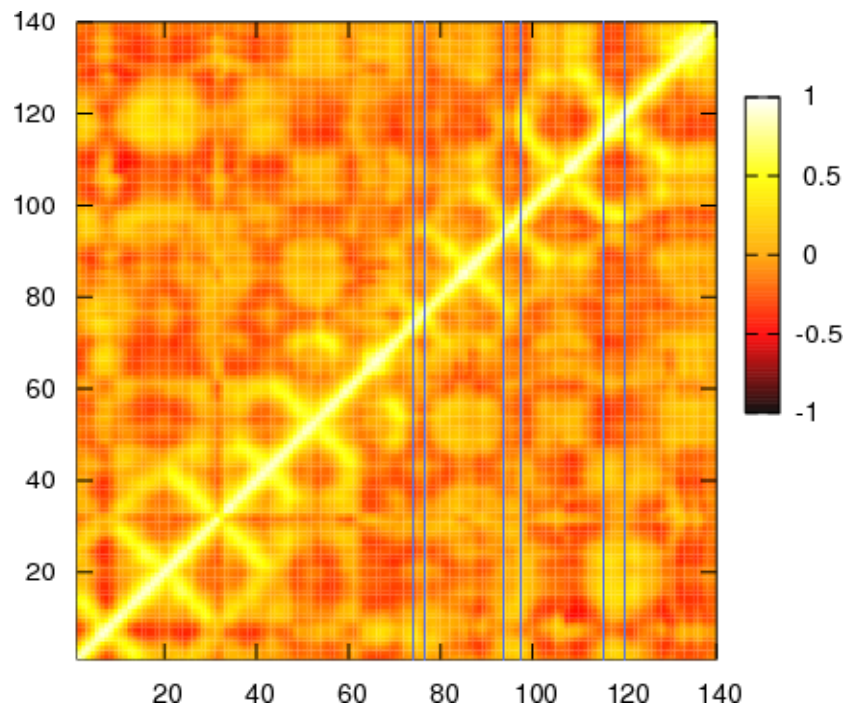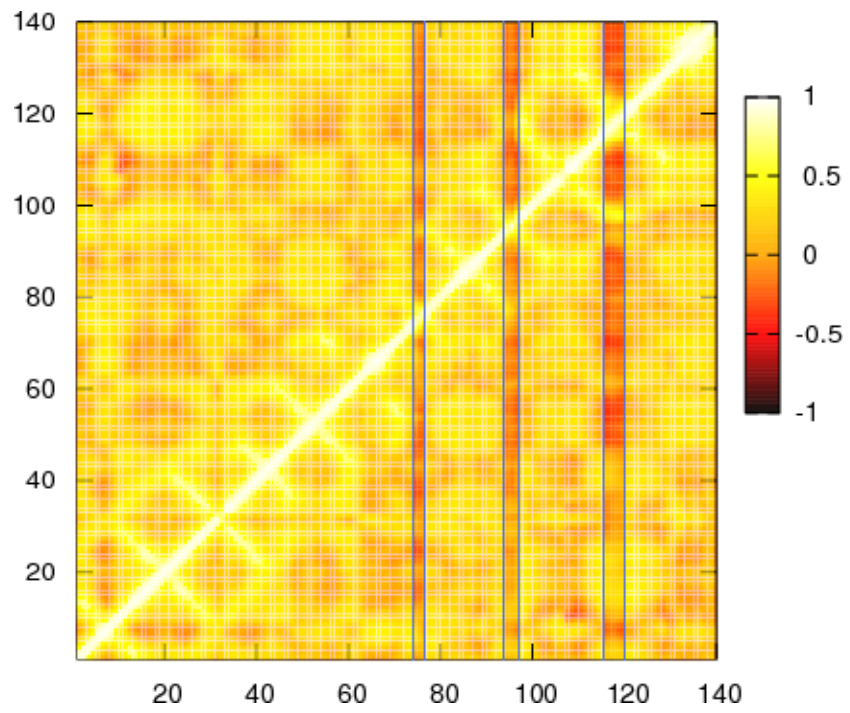

# 1PKO

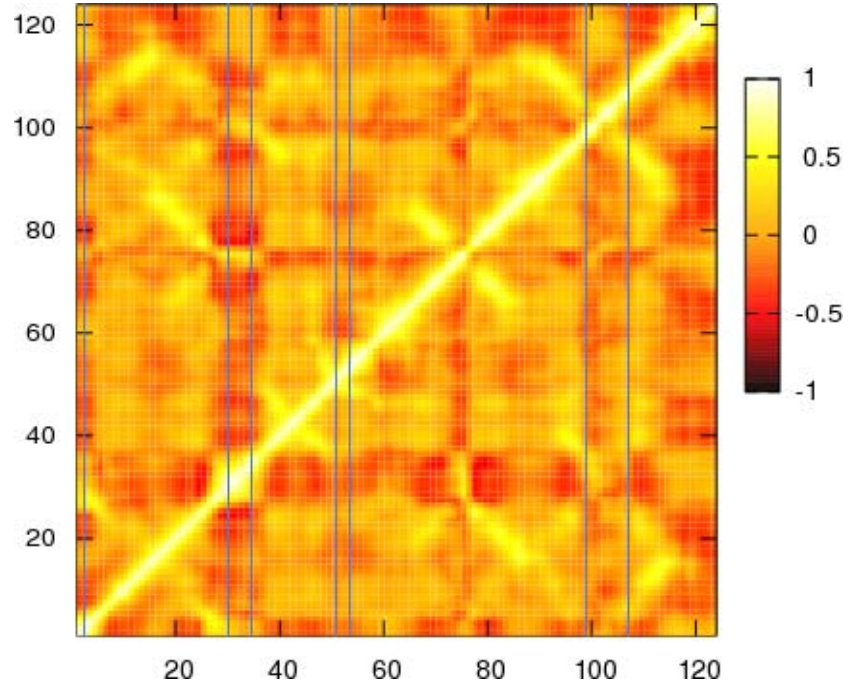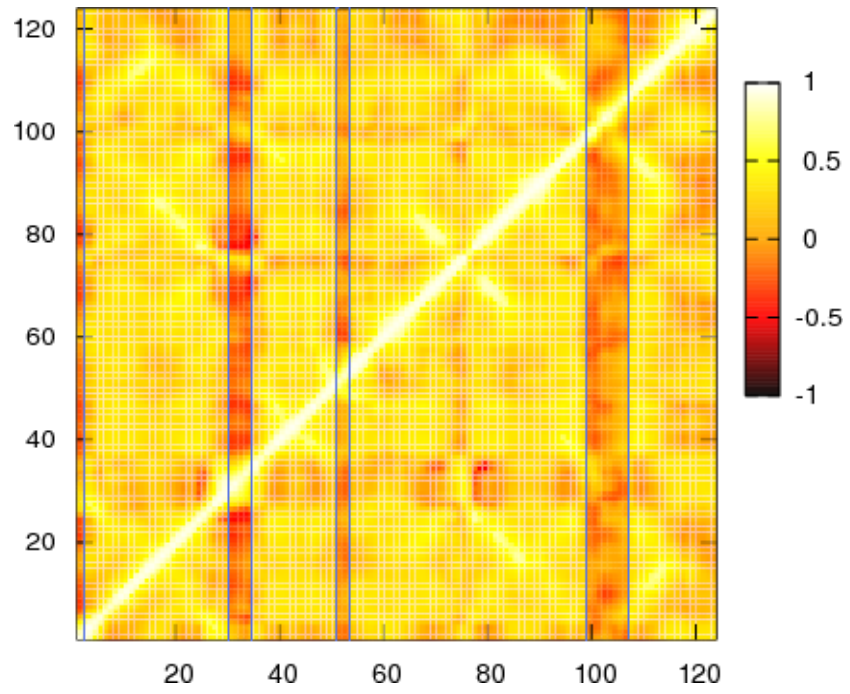

# 1POH

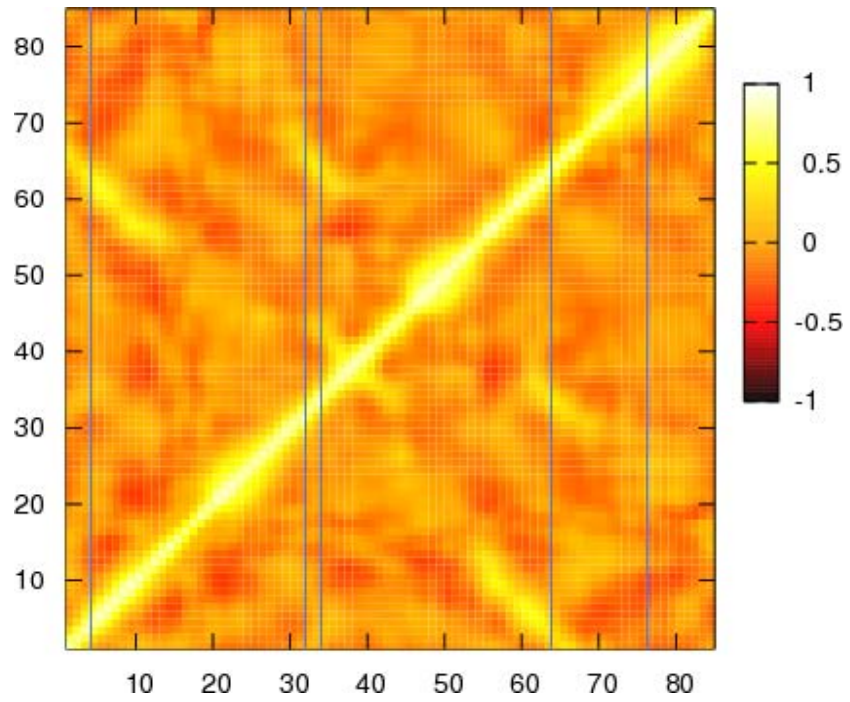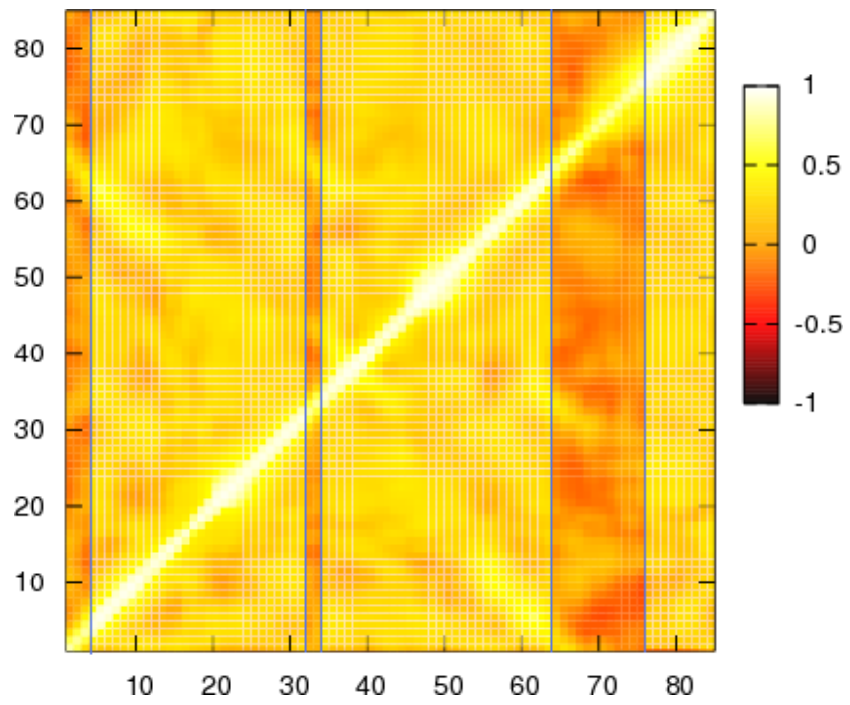

# 1TFH

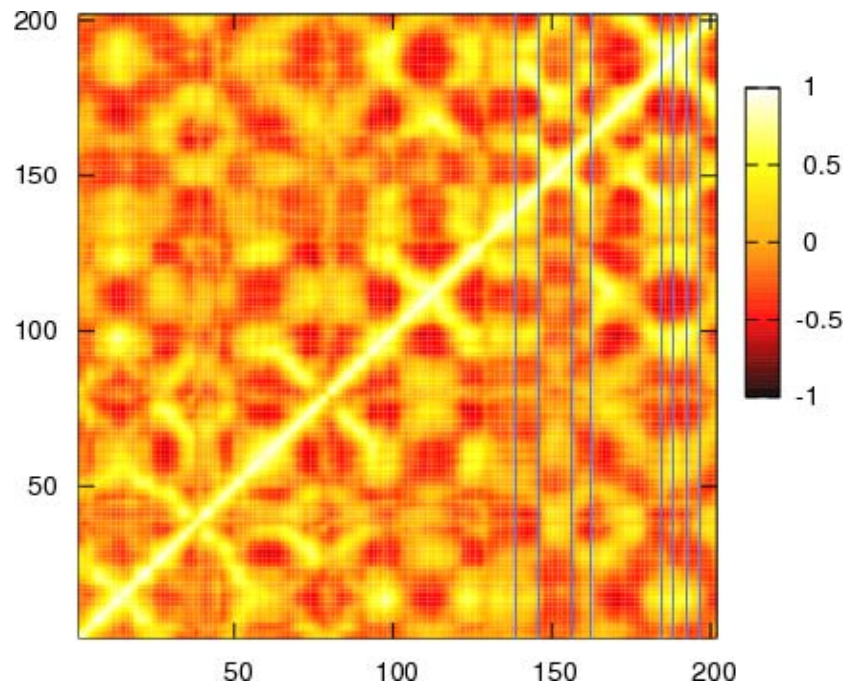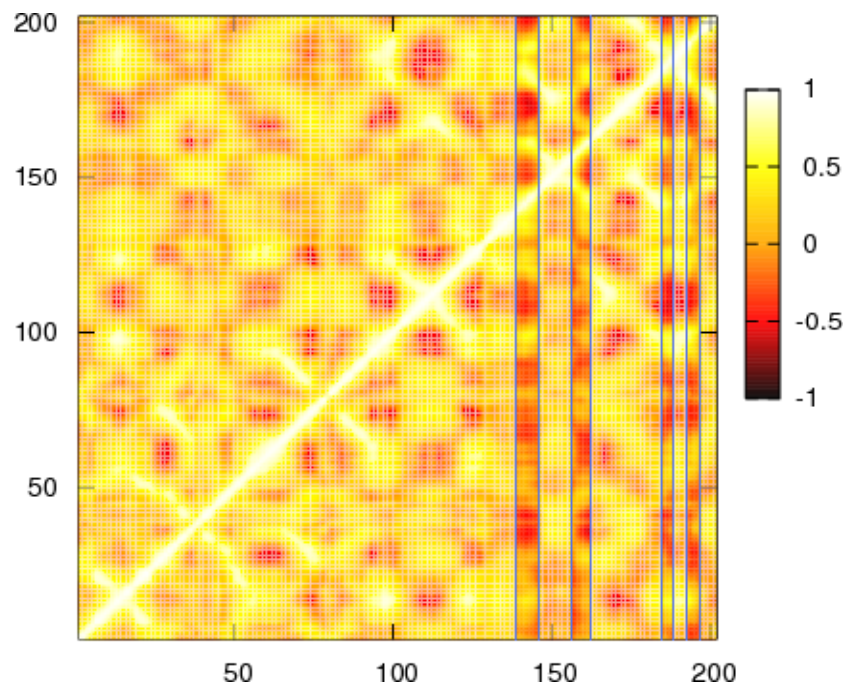



# 1UW3

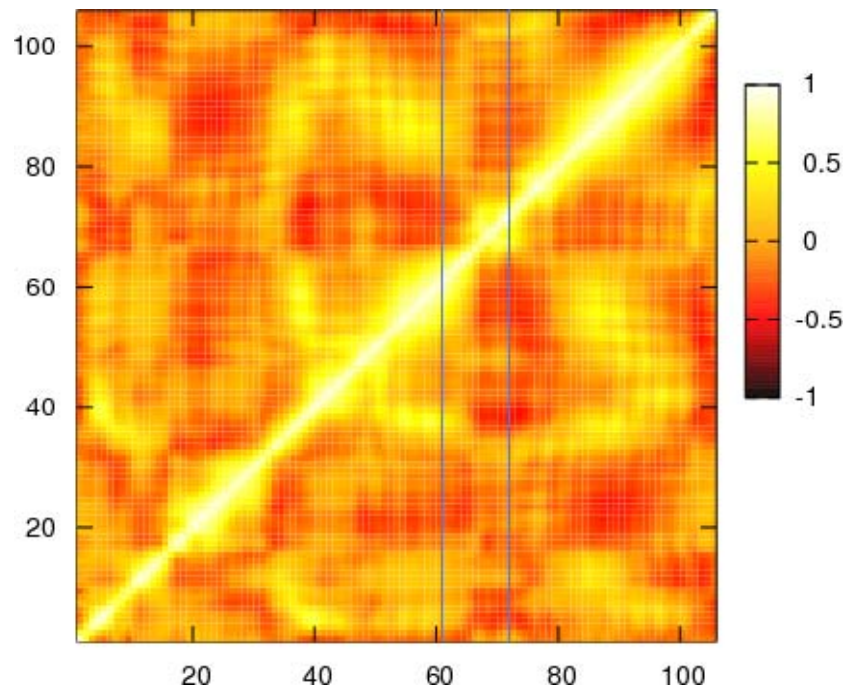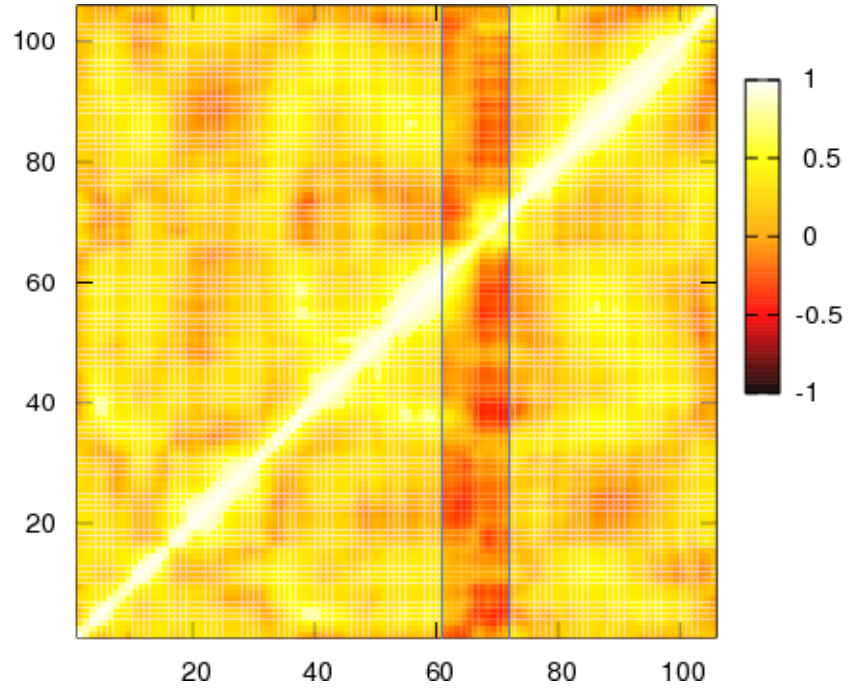

### 2VPF

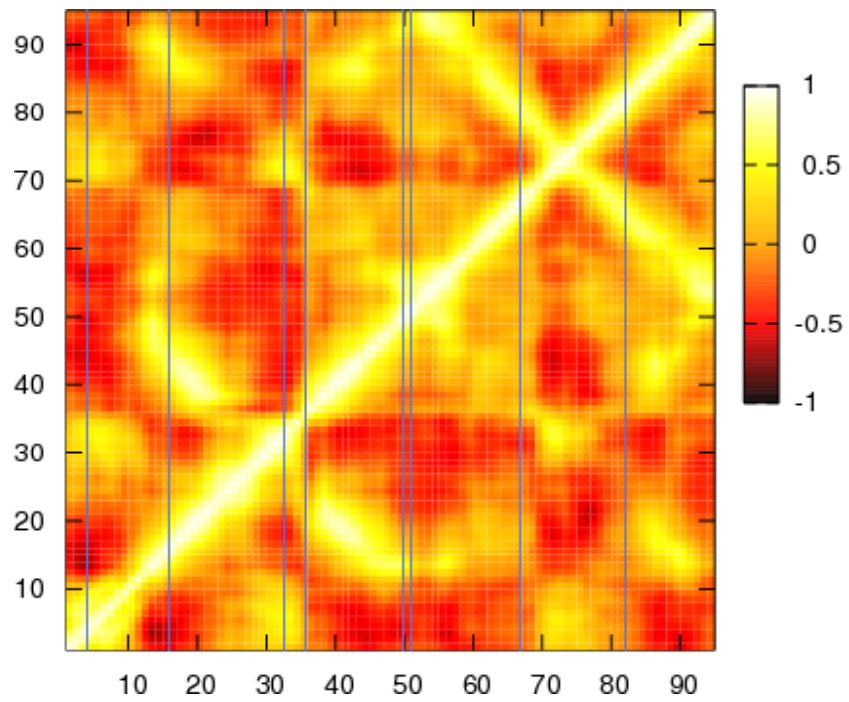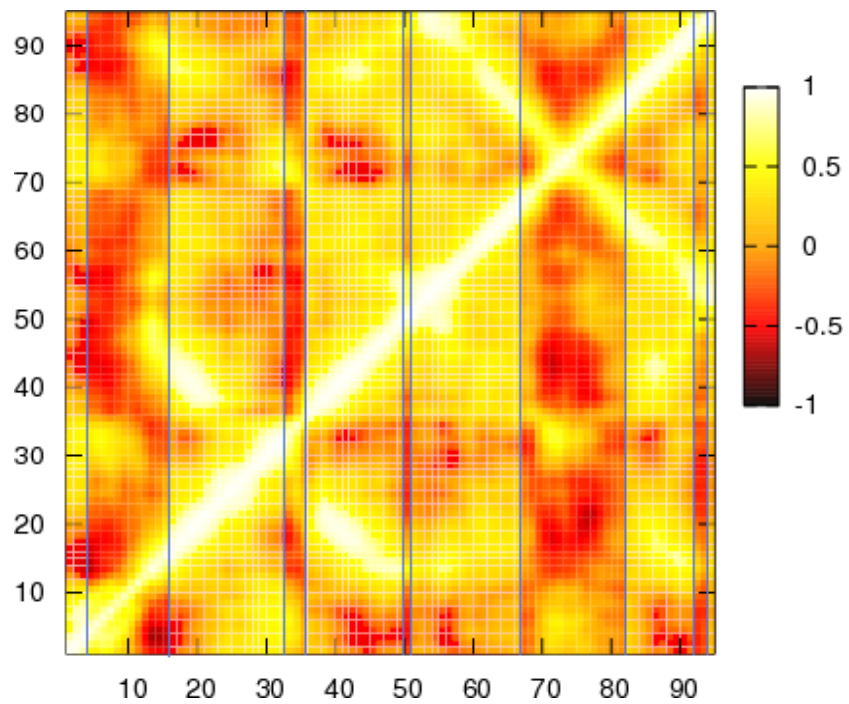

### 3LZT

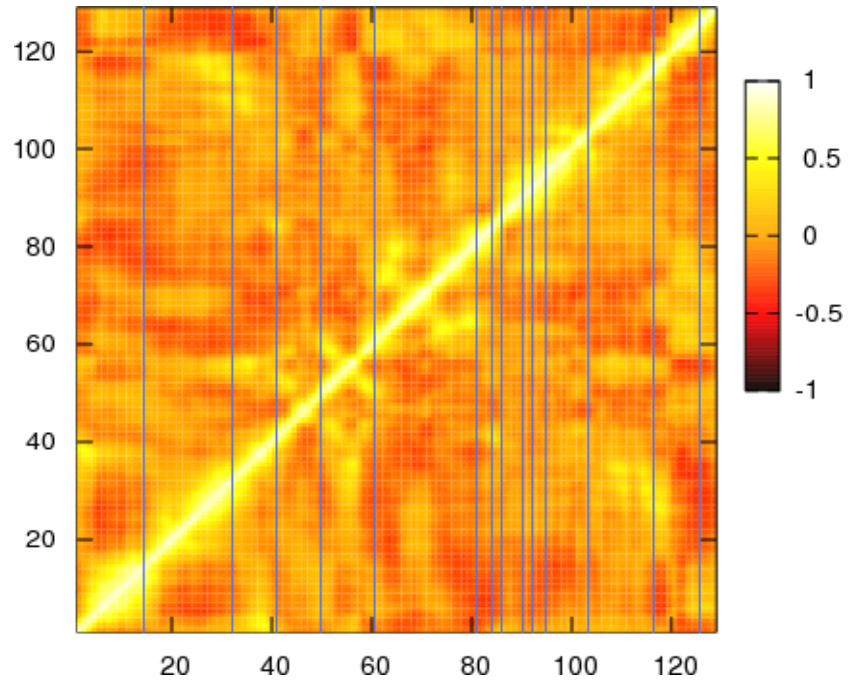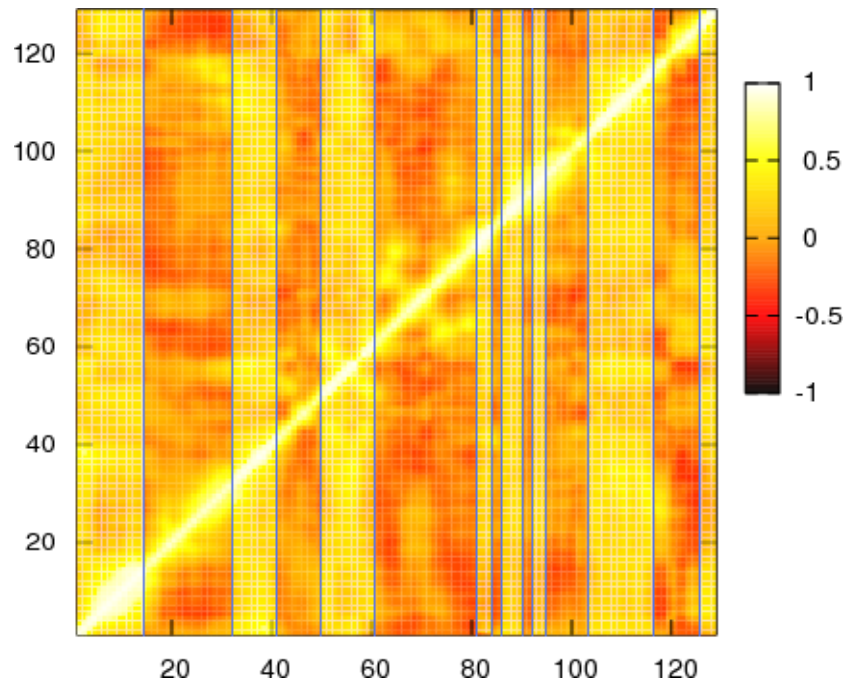

# 7NN9

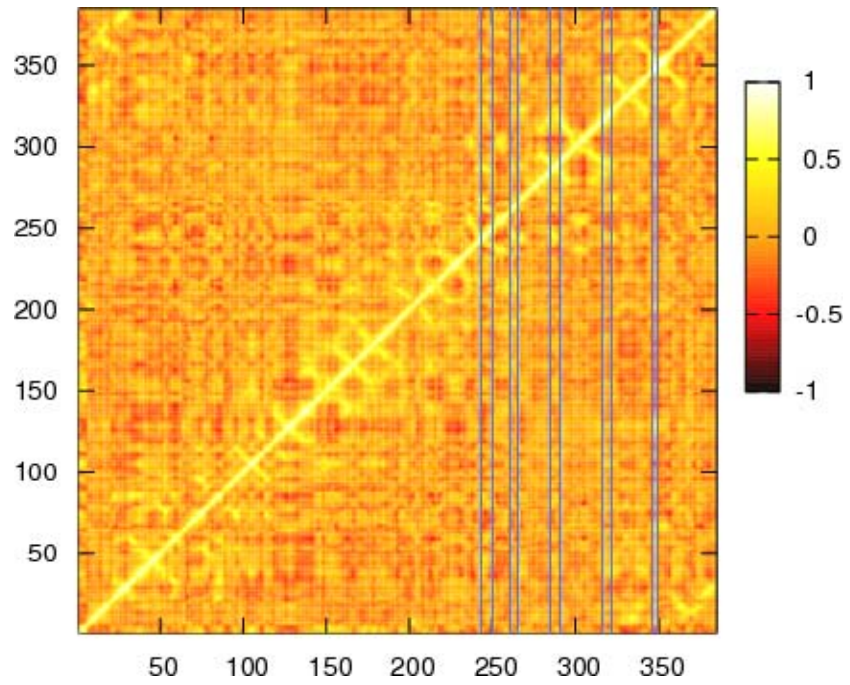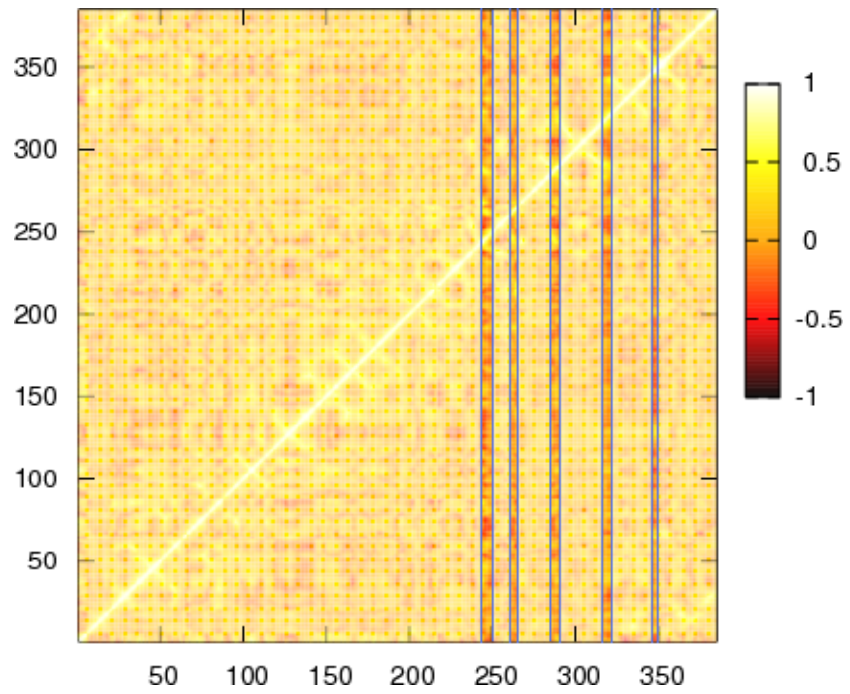



# ROC curves

**1A03**

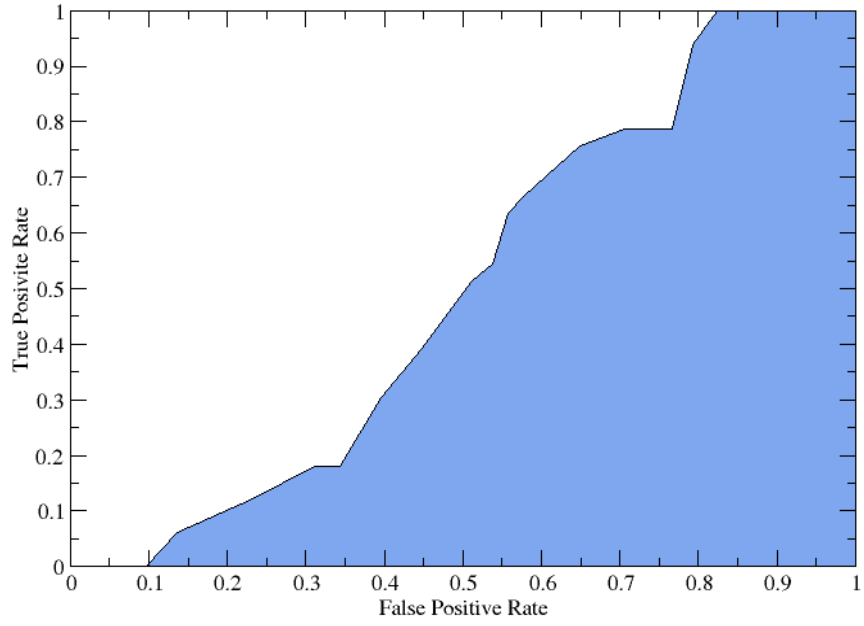

**1AUQ**

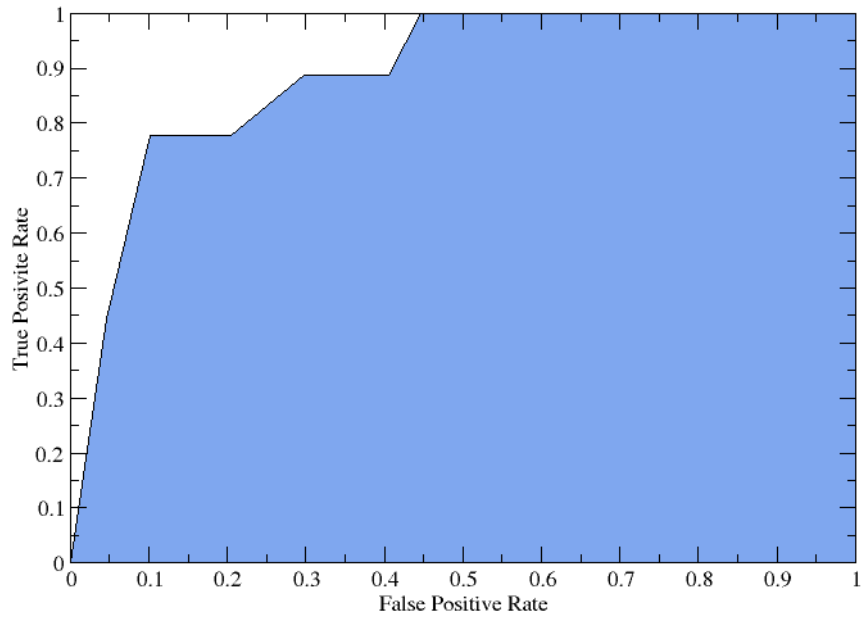

### 1BV1

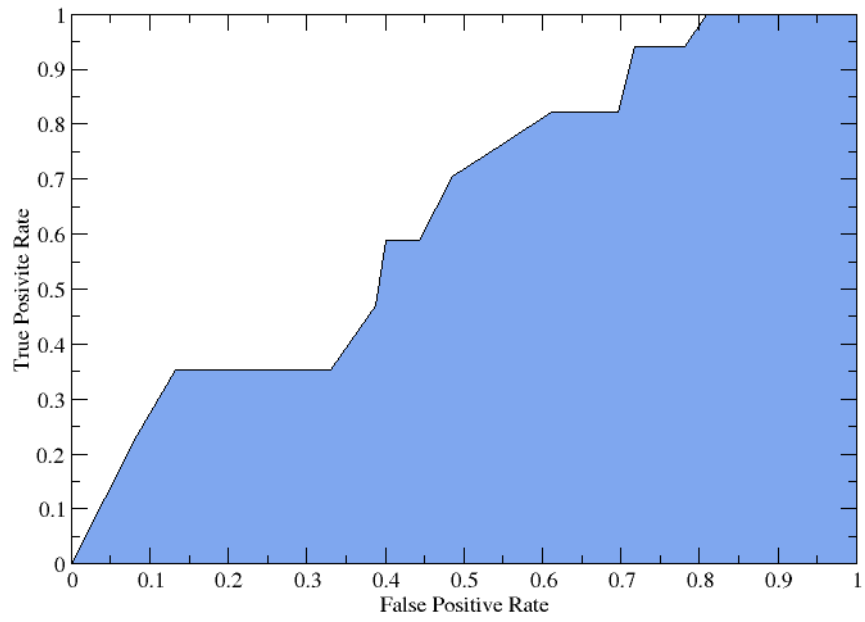

### 1CK4

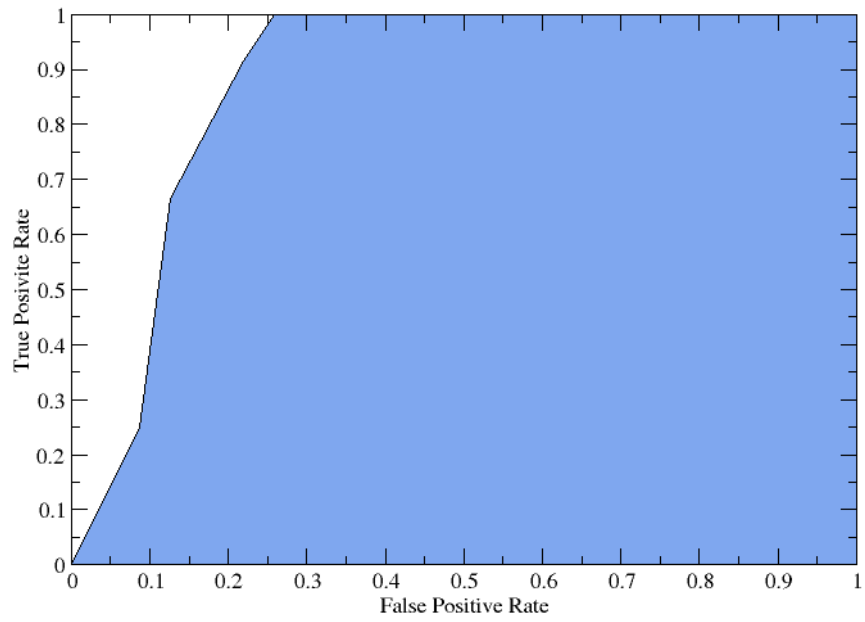

### 1CMW

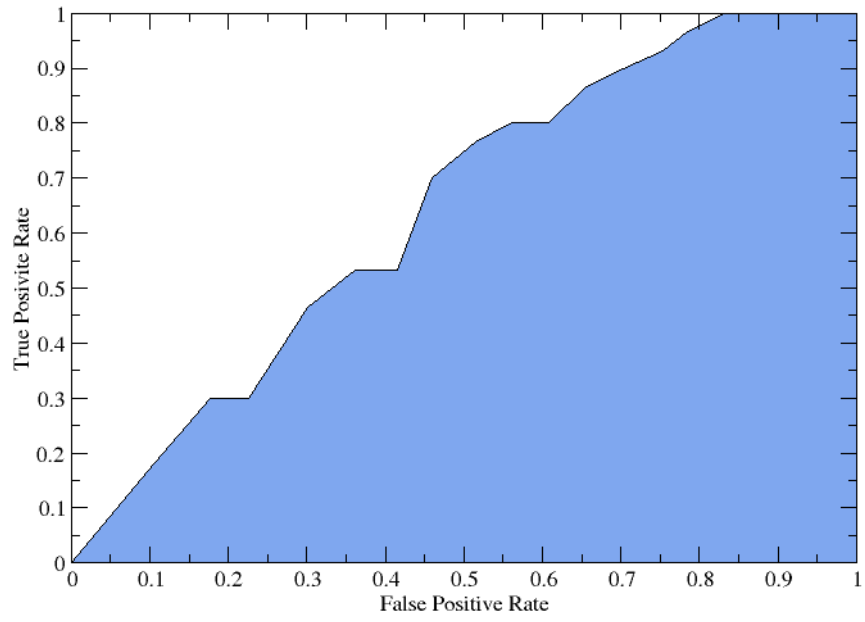

### 1D7P

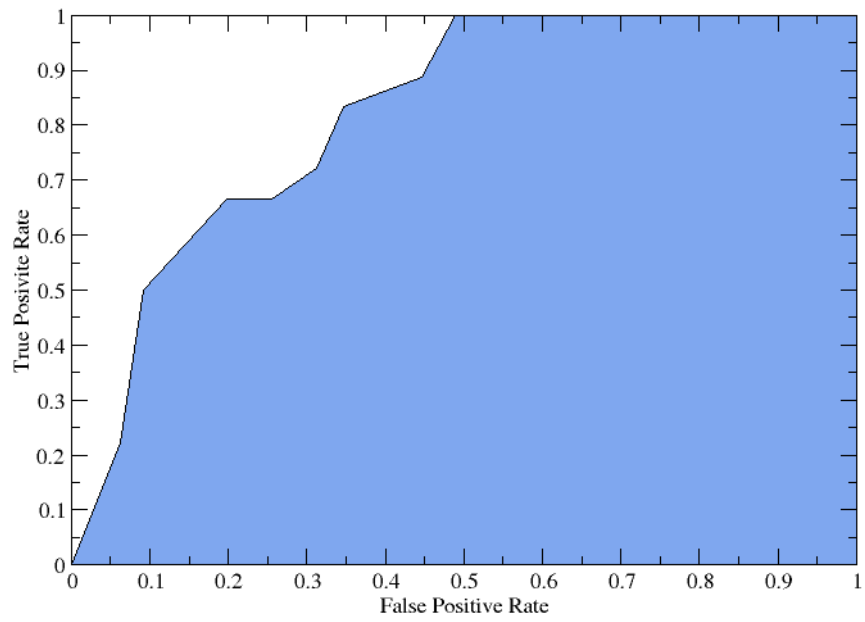

### 1GWP

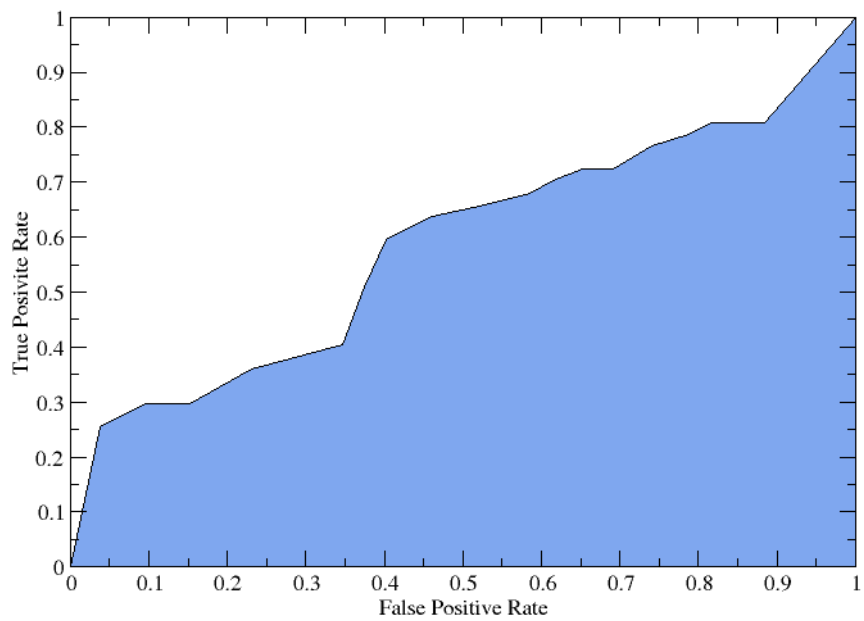

### 1HCN

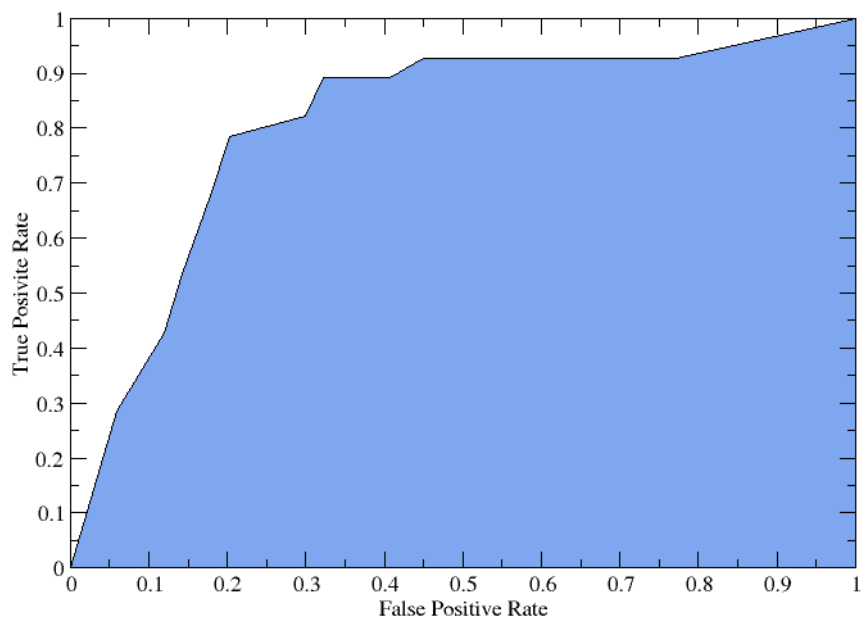

### 1K59

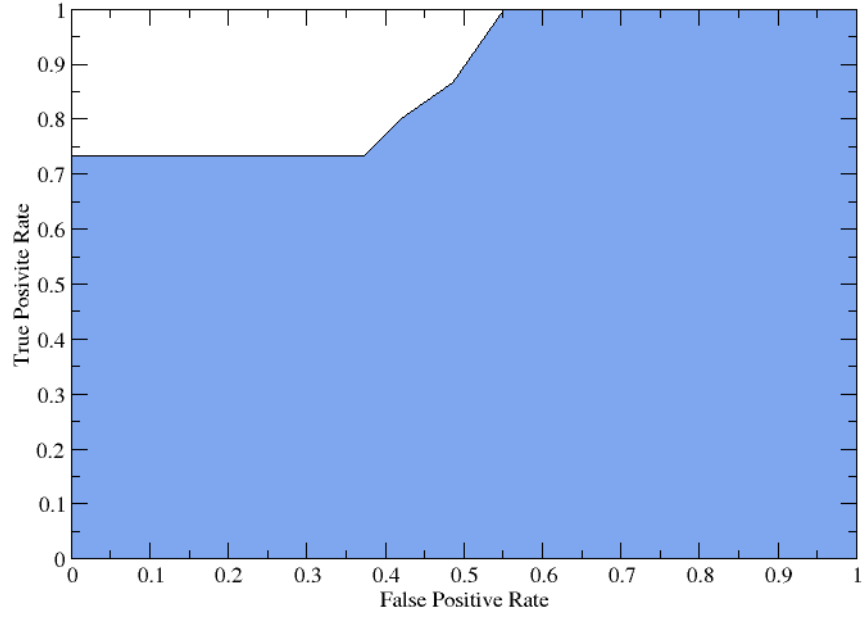

### 1KDC

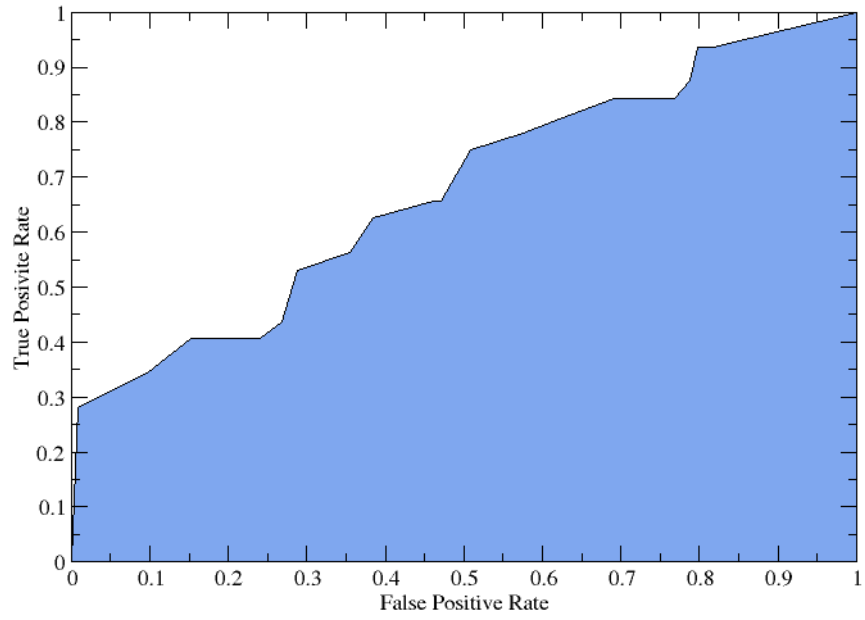

### 1KZQ

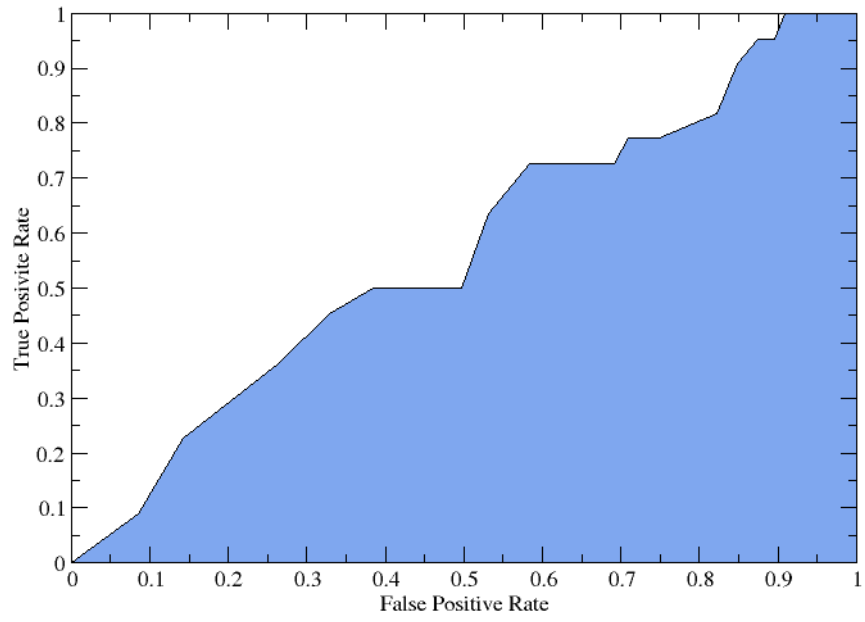

### 1P4P

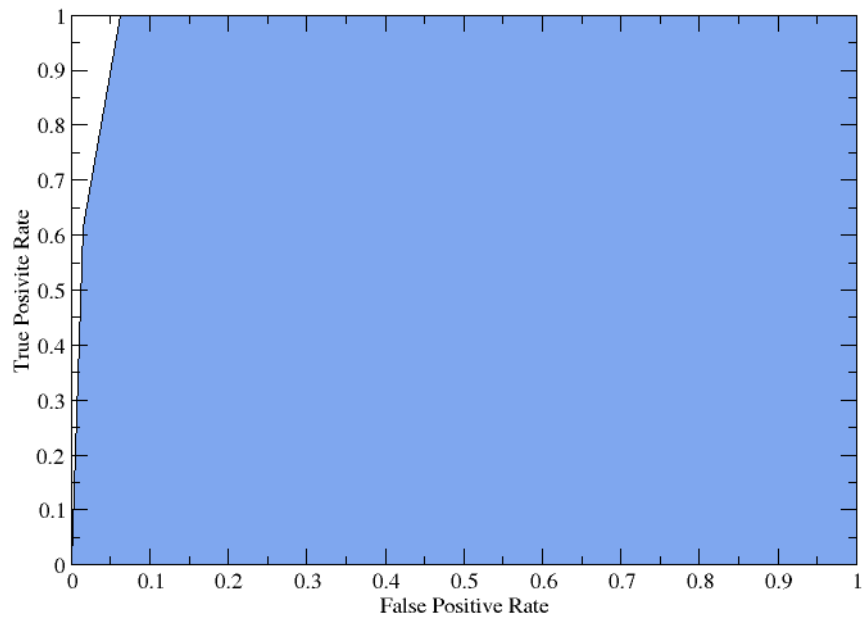

### 1PKO

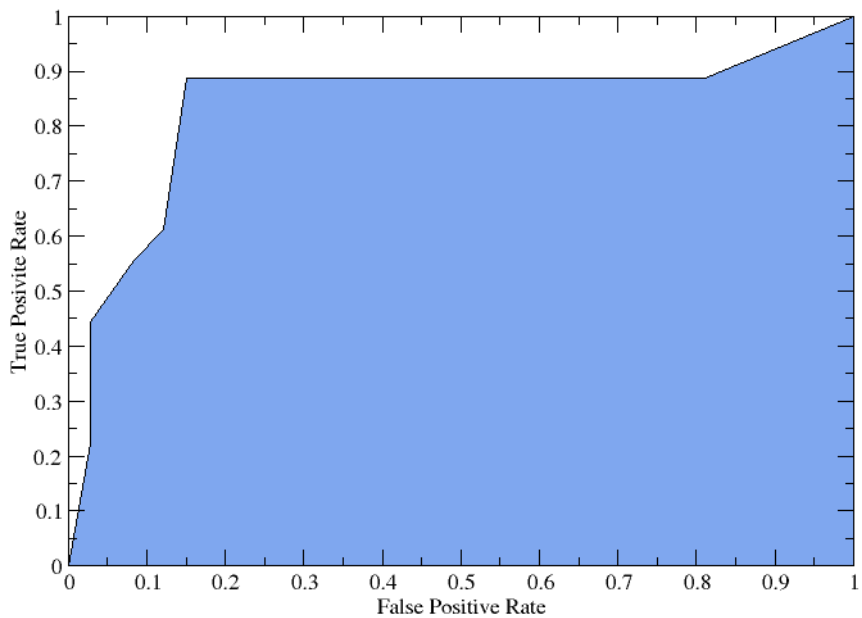

### 1POH

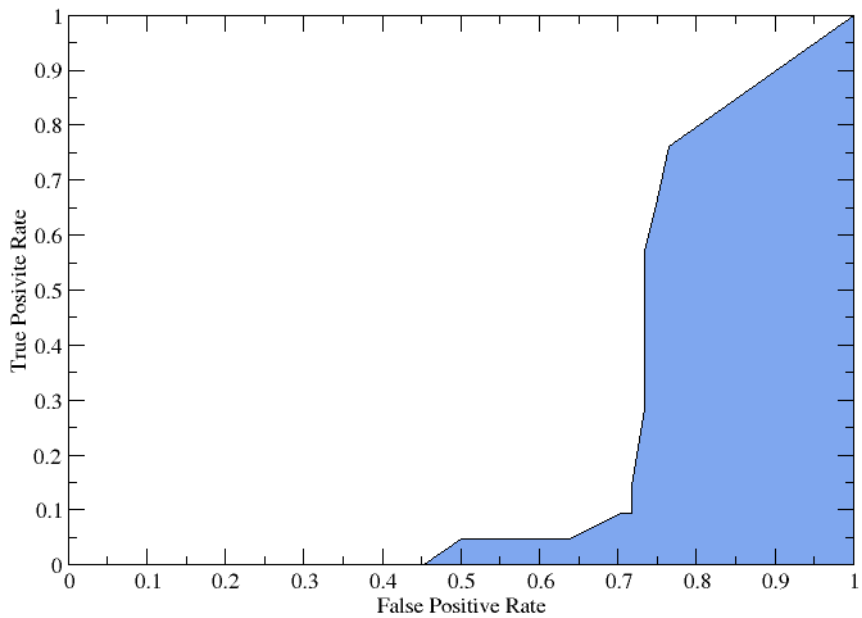

### 1TFH

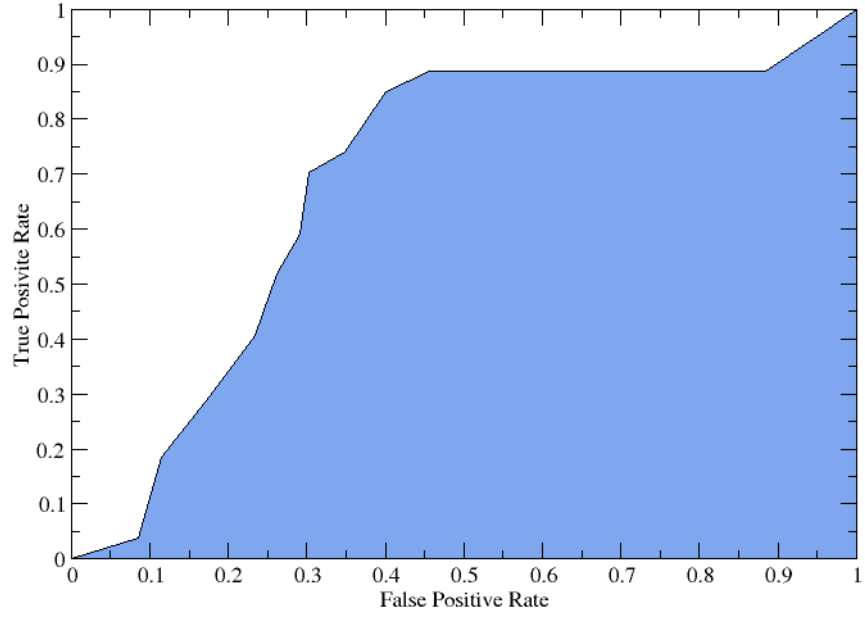

### 1UW3

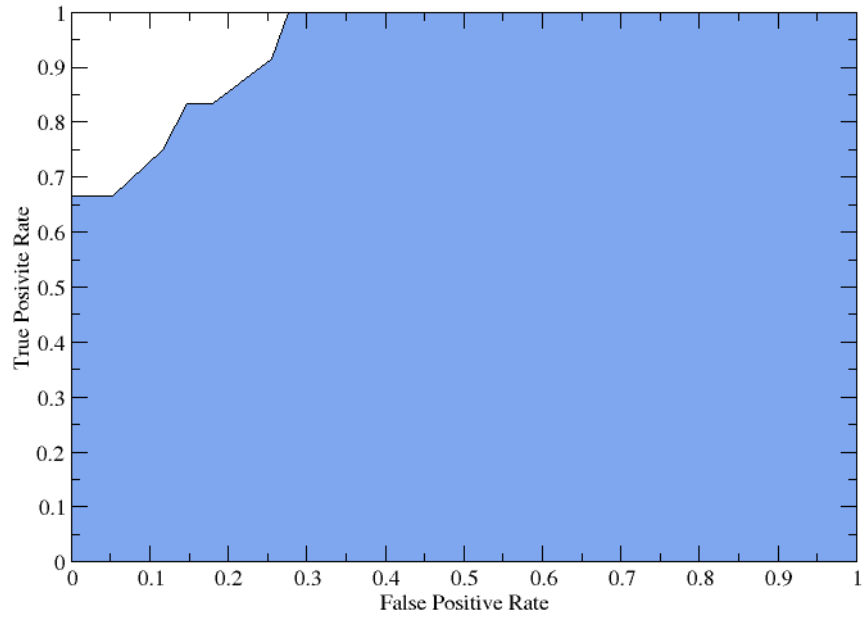



## 2VPF

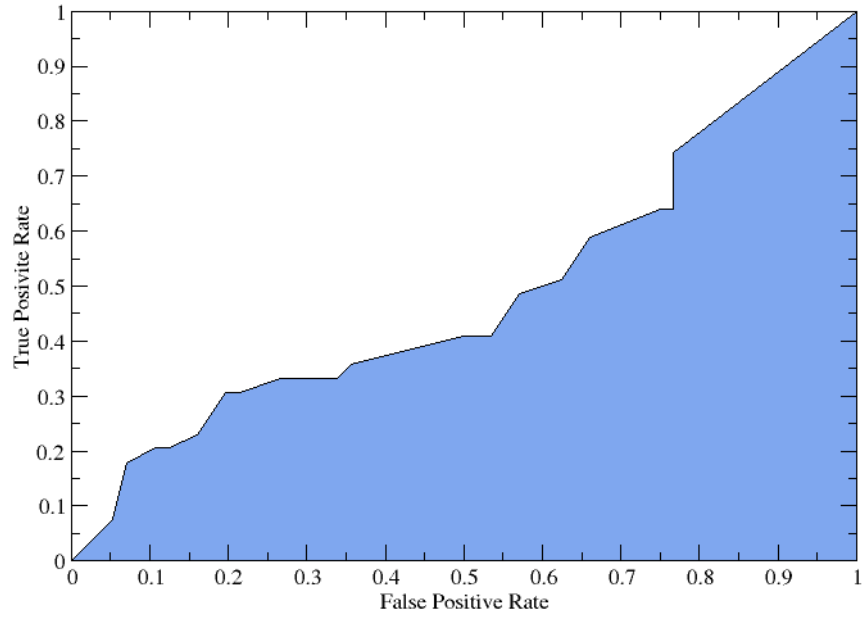

## 3LZT

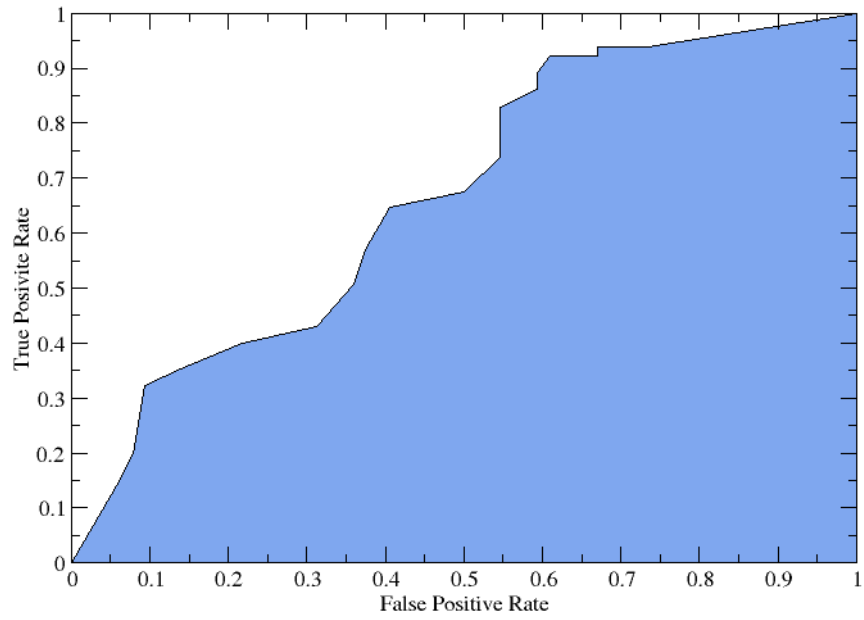

# 7NN9

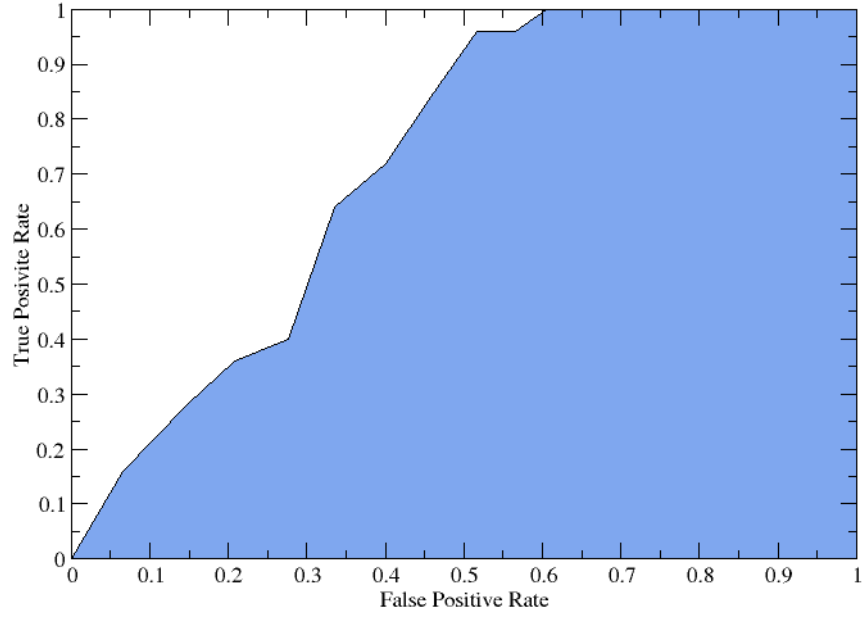

**Distribution of Eigenvalues Calculated with the Energy Decomposition approach.**

**1AO3**

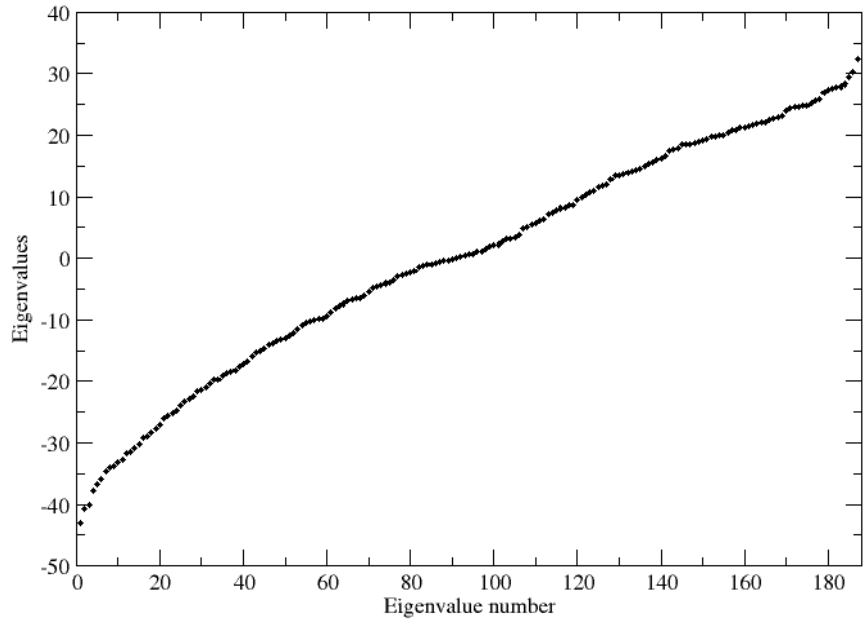

**1AUQ**

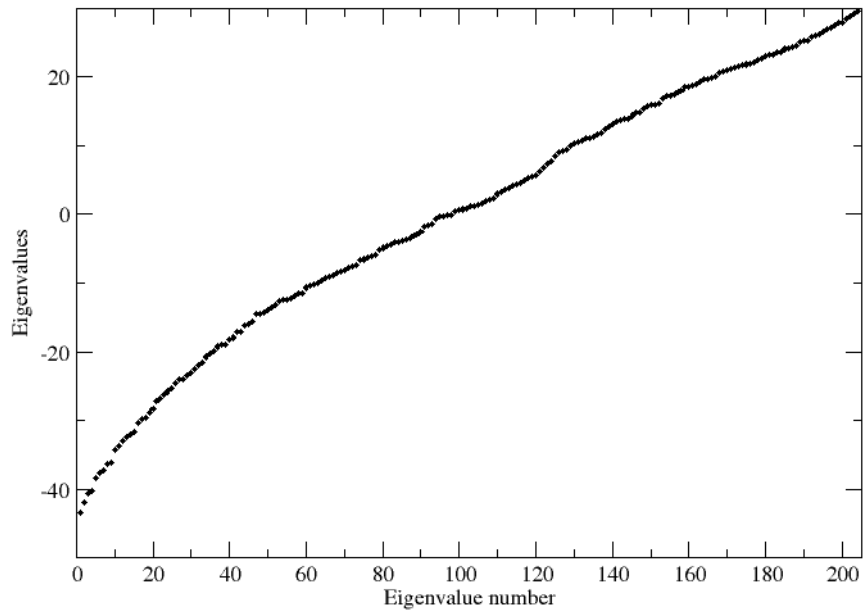

### 1BV1

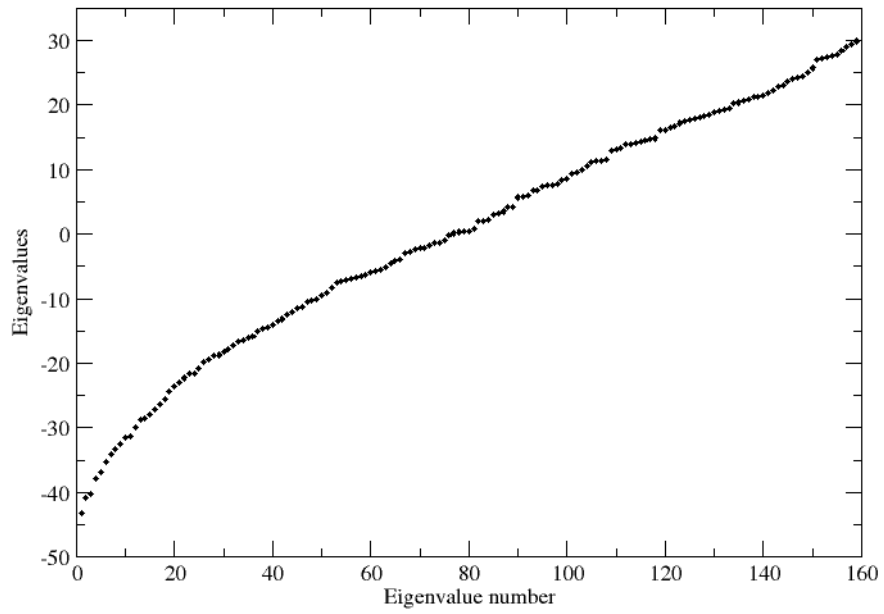

### 1CK4

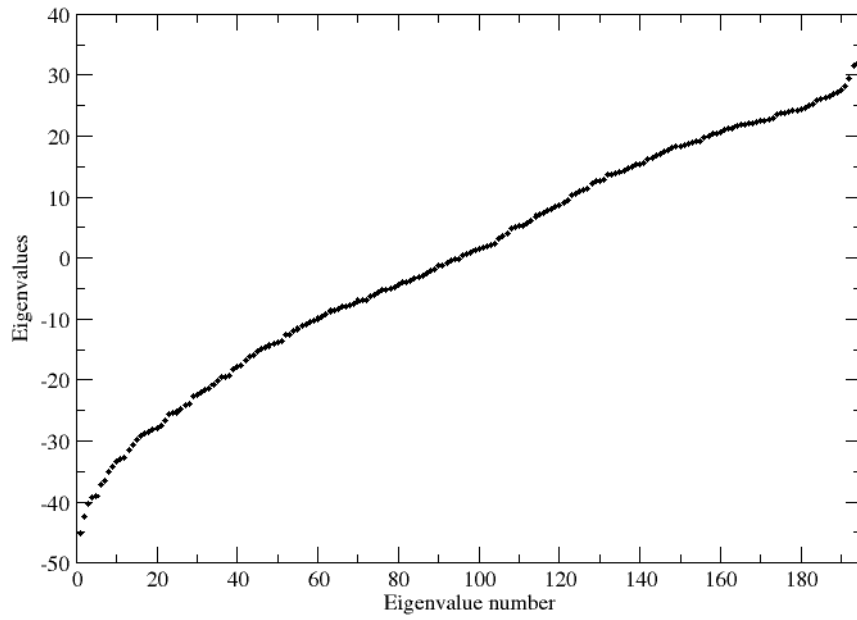

### 1D7P

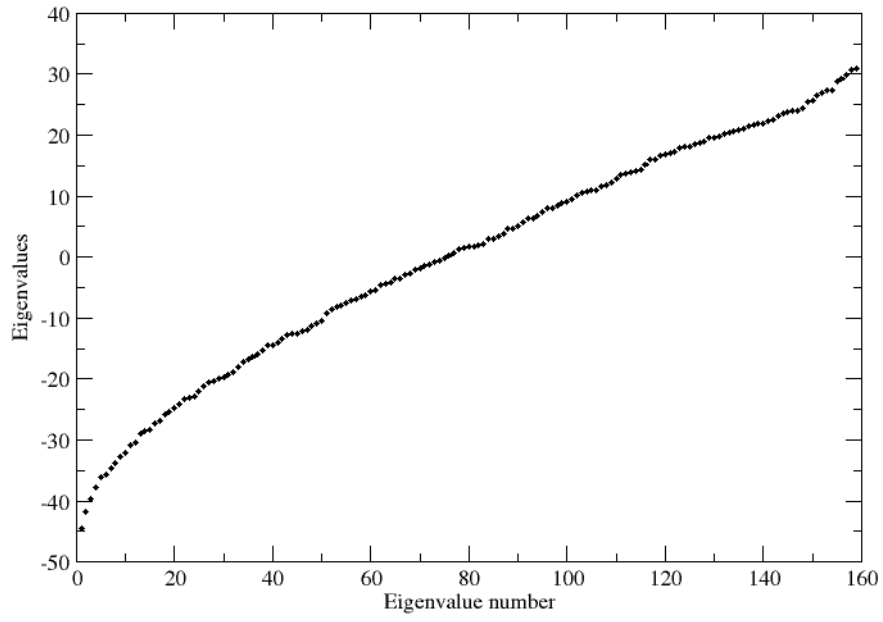

### 1GWP

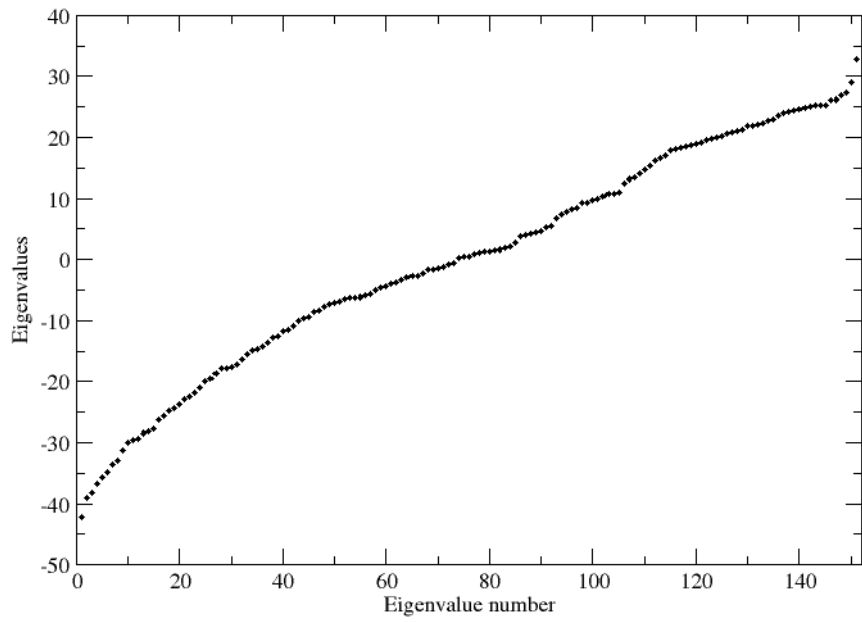

### 1HCN

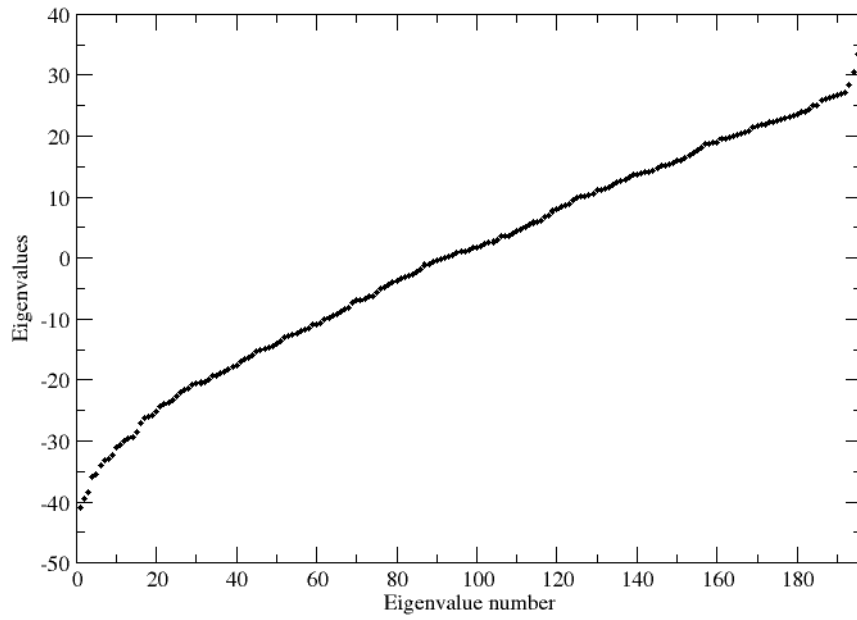

### 1K59

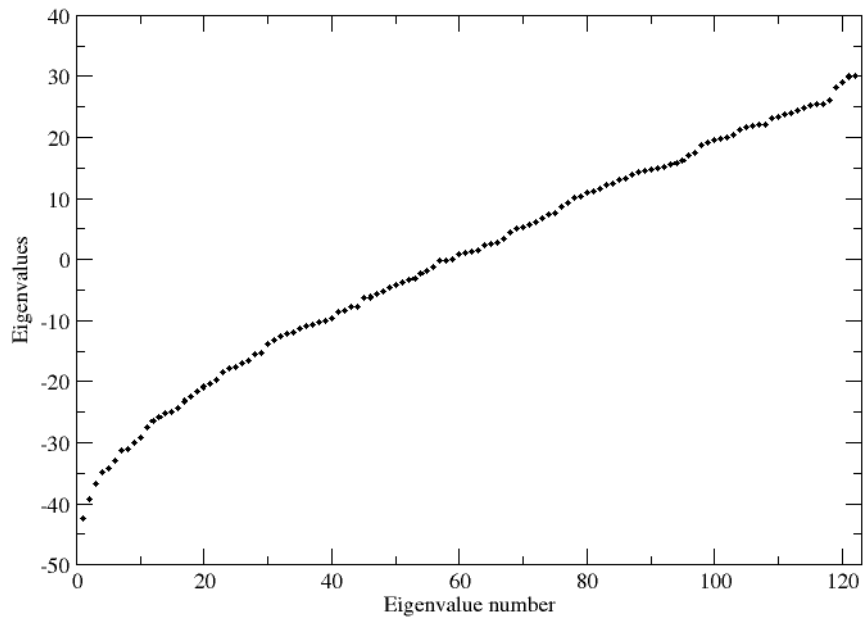

### 1KDC

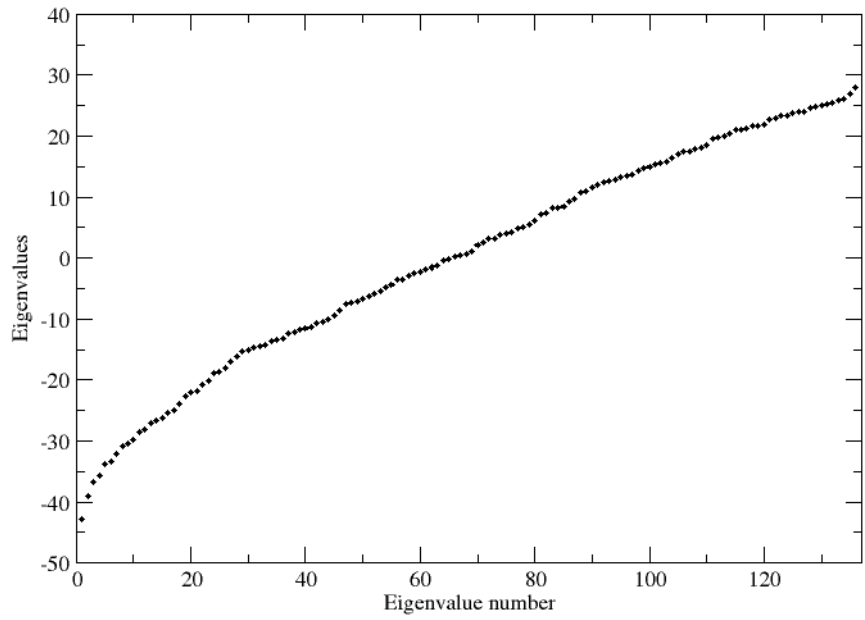

### 1KZQ

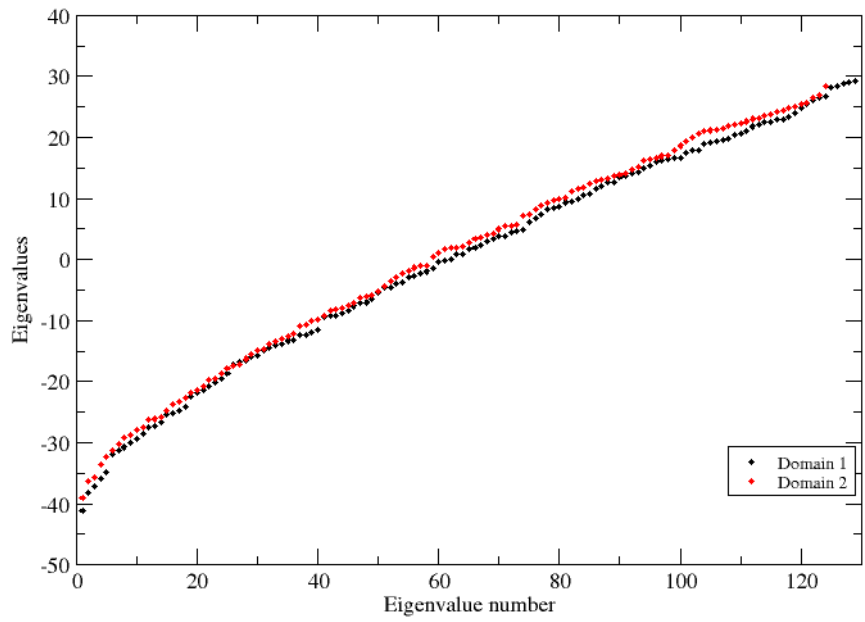

### 1P4P

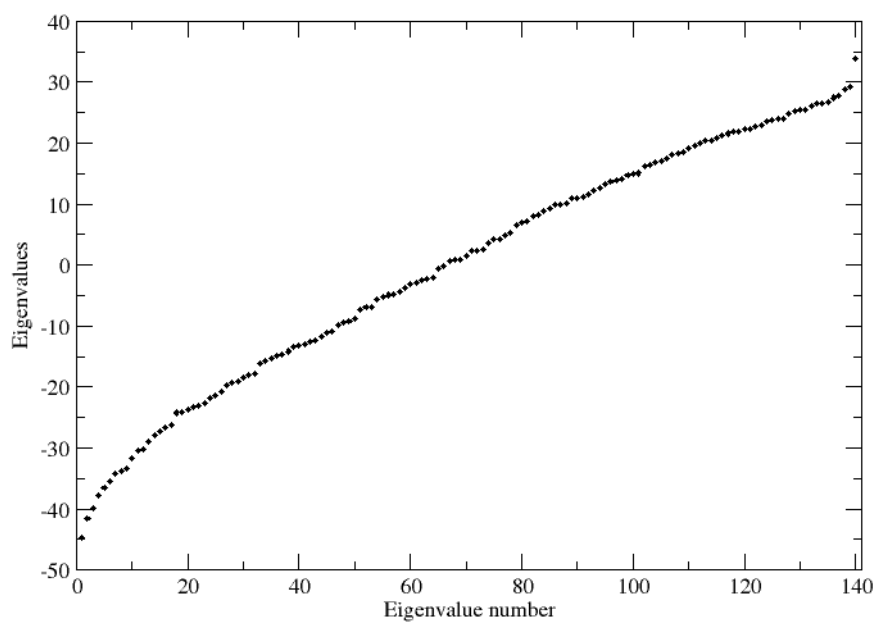

### 1PKO

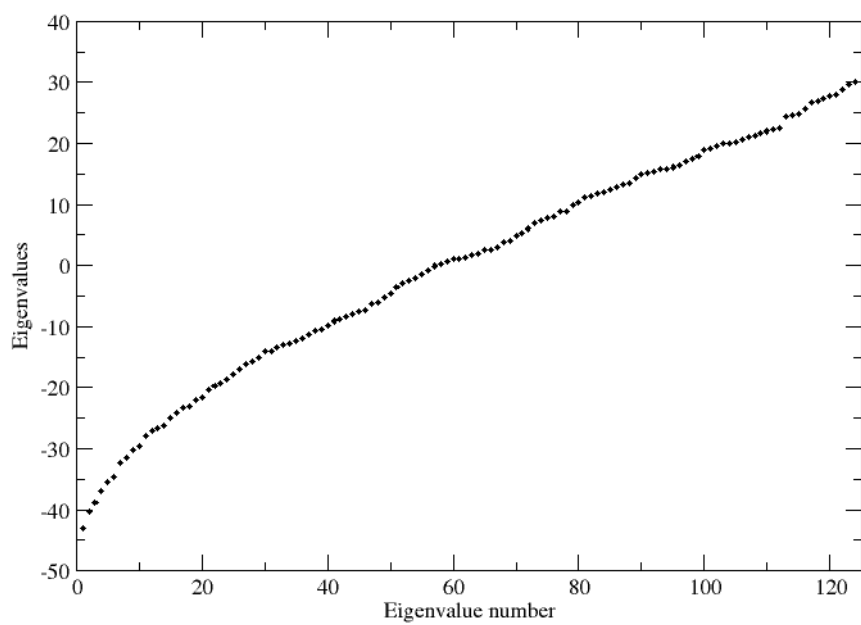

### 1POH



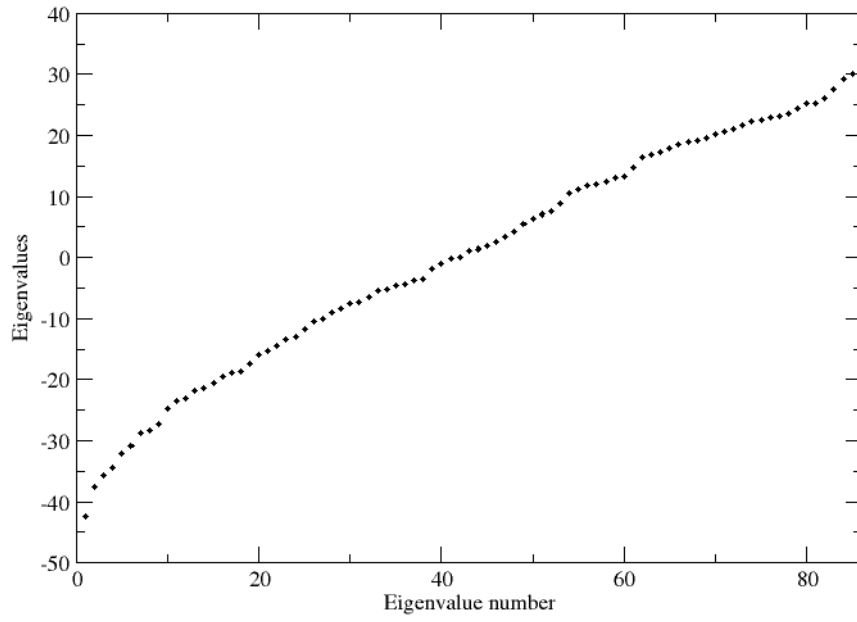

**1TFH**

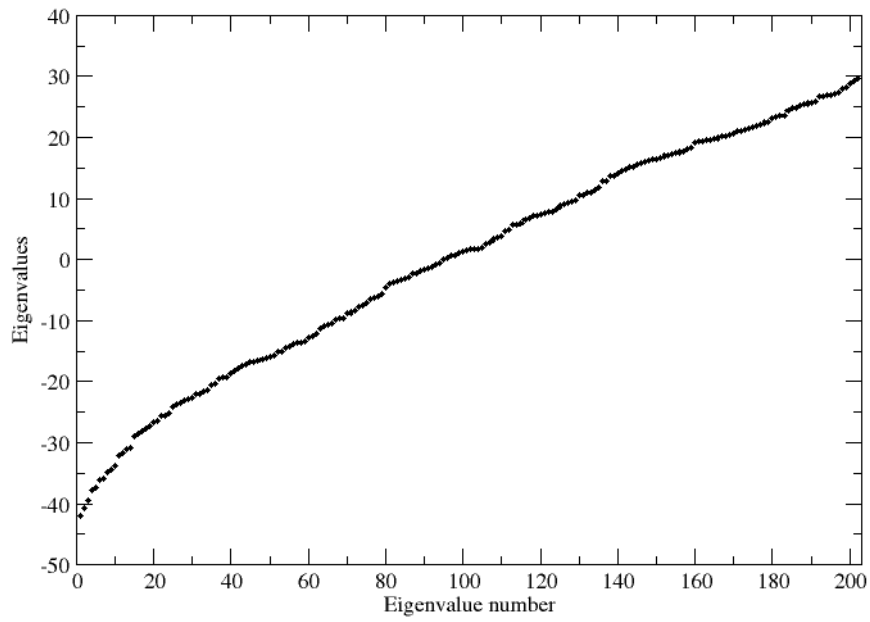

### 1UW3

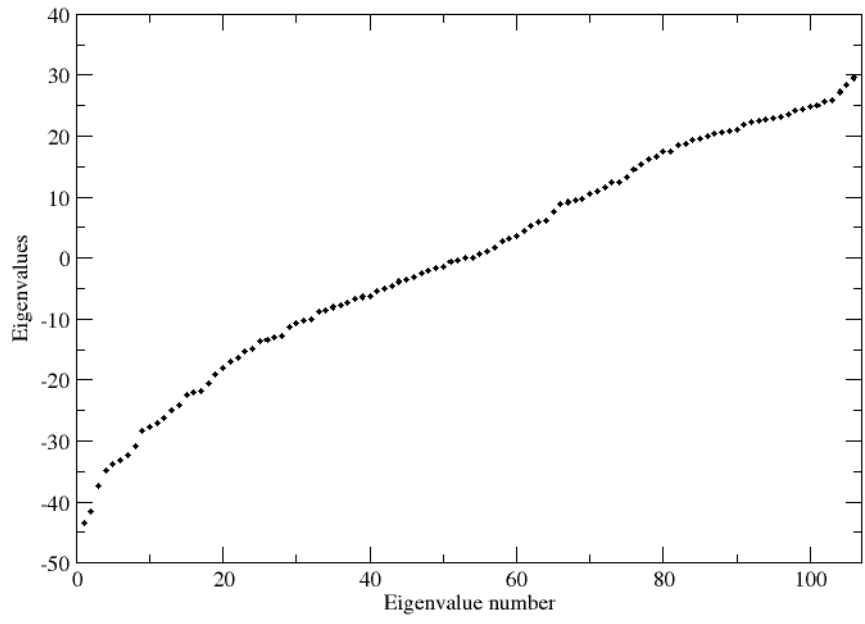

### 2VPF

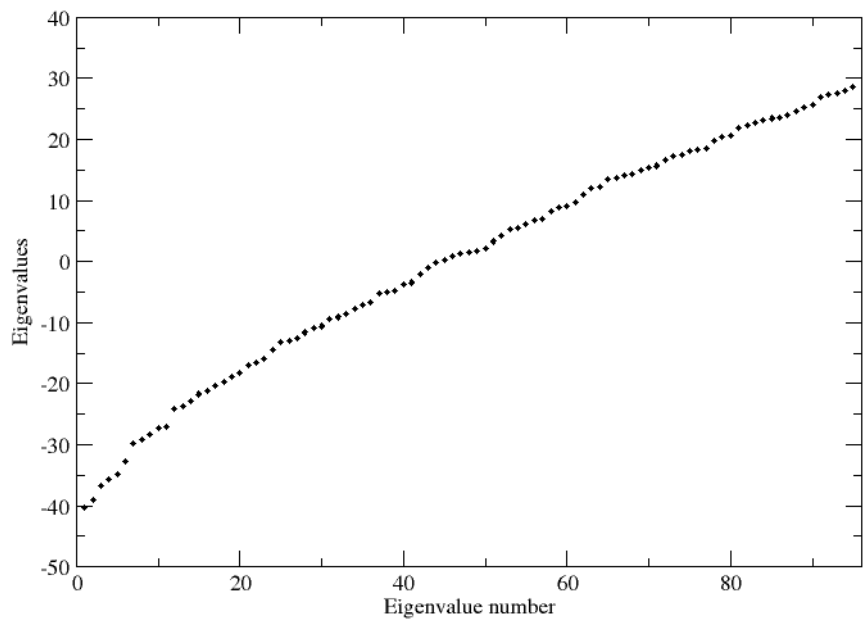

### 3LZT

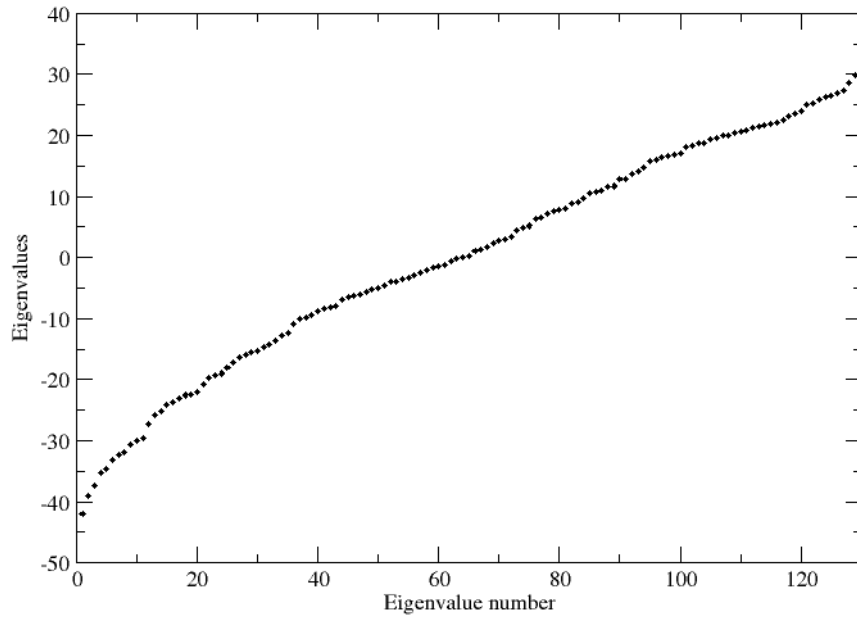

**7NN9**

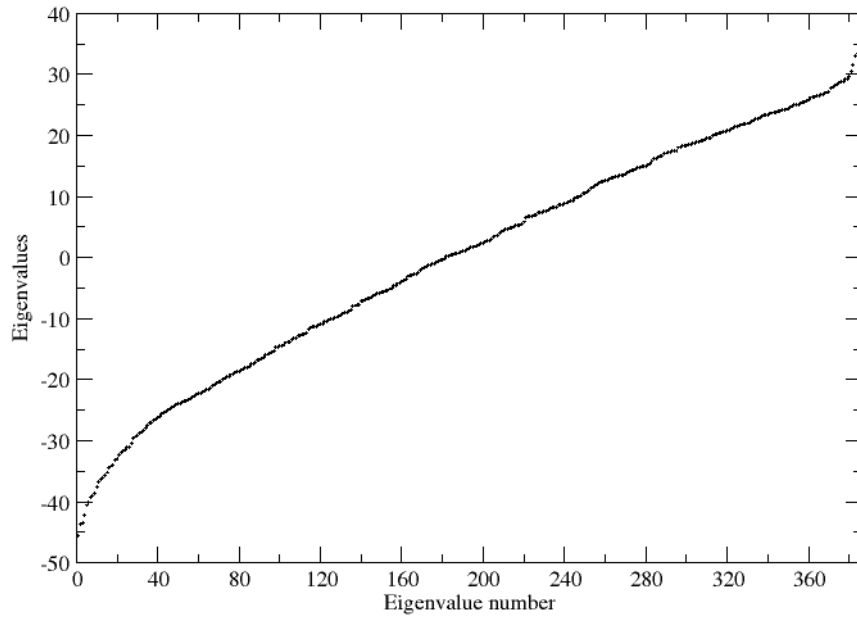

Comparison of the simplified energy matrices for each protein with the respective residue-residue cross correlation matrix.

### 1AO3

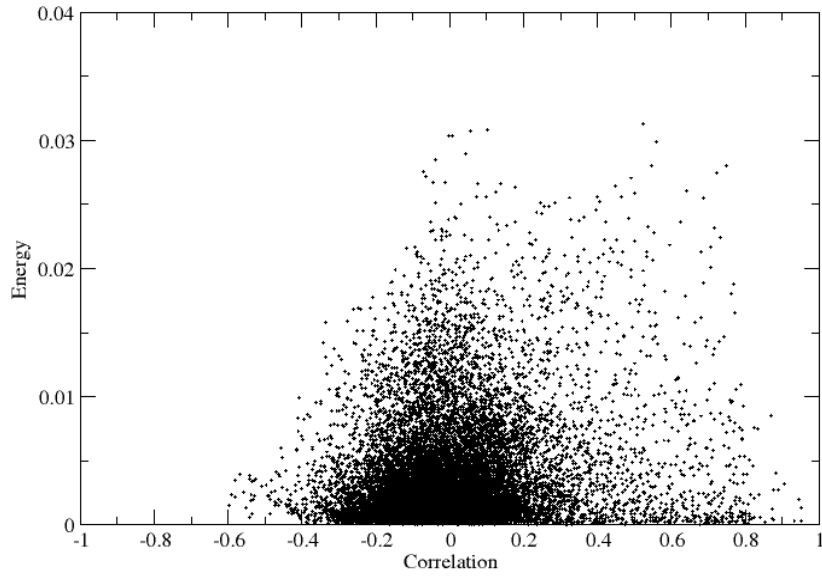

Correlation coefficient = 0.16

### 1AUQ

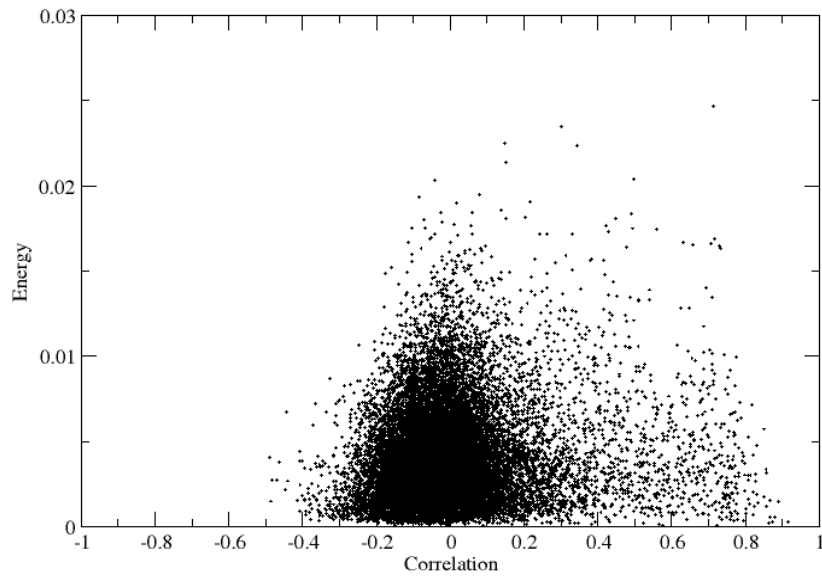

Correlation coefficient = 0.09

### 1BV1

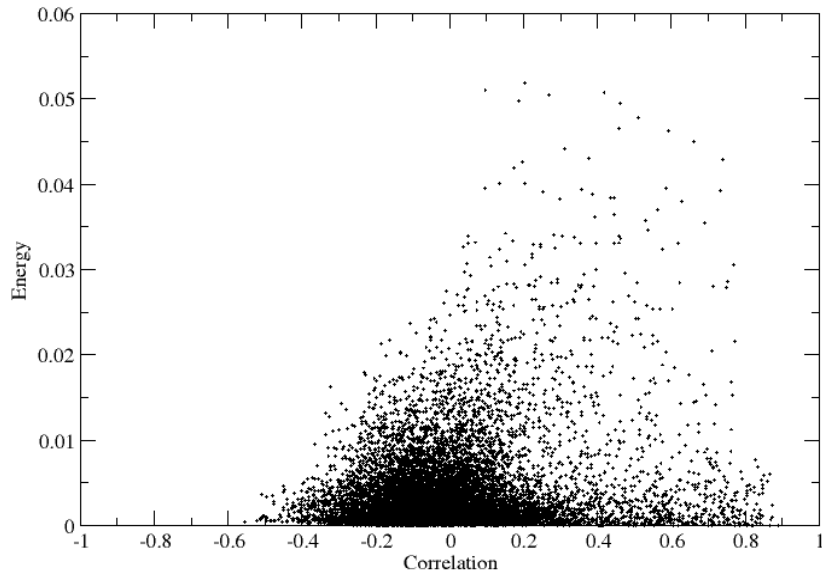

Correlation coefficient = 0.18

### 1CK4

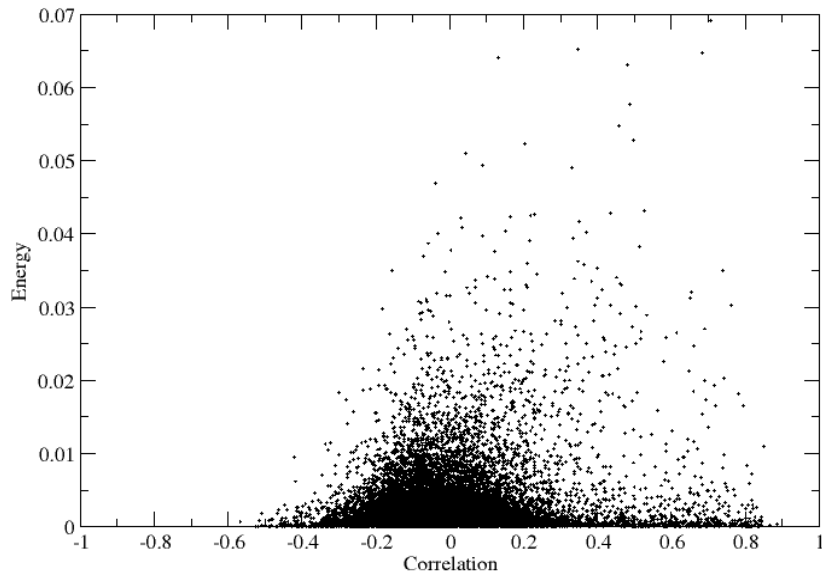

Correlation coefficient = 0.13

## 1CMW

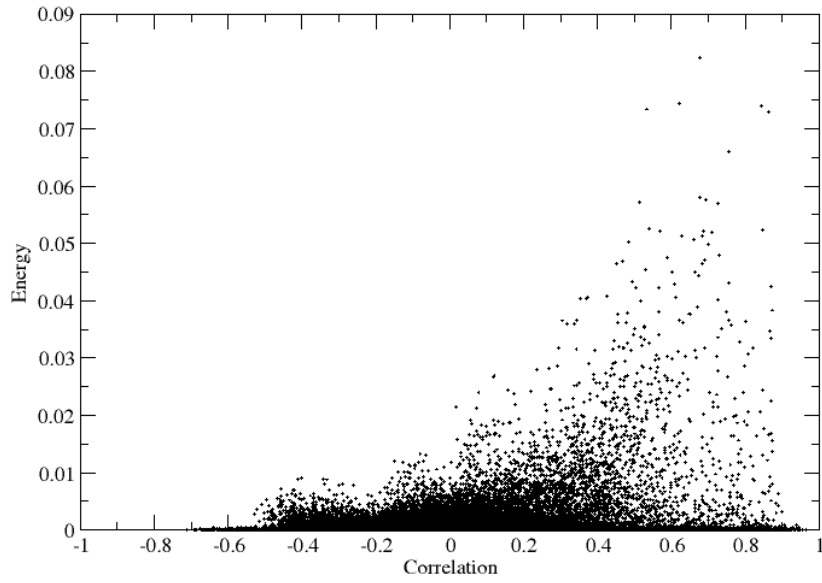

Correlation coefficient = 0.27

## 1D7P

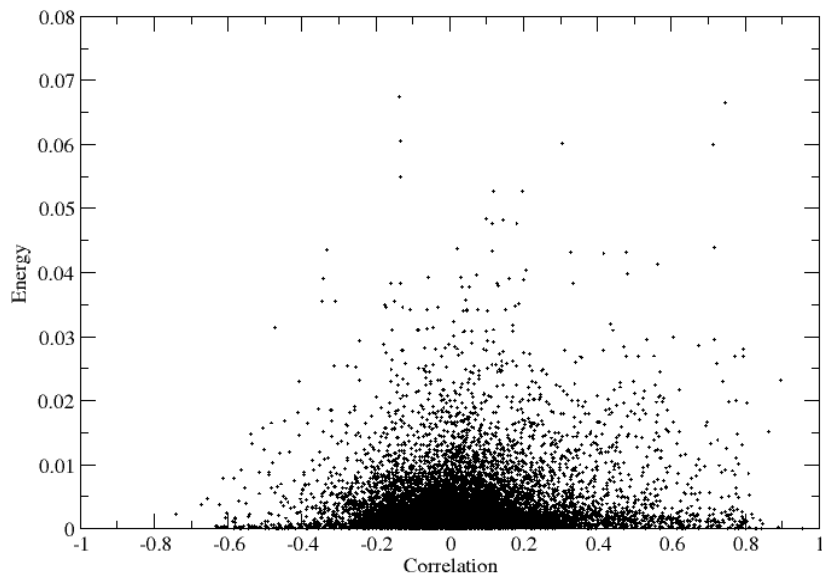

Correlation coefficient = 0.13

## 1GWP

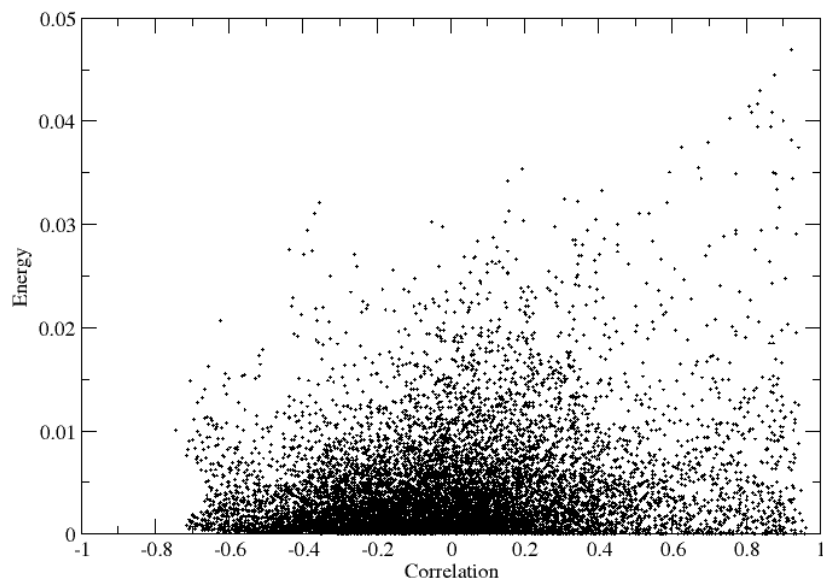

Correlation coefficient = 0.20

## 1HCN

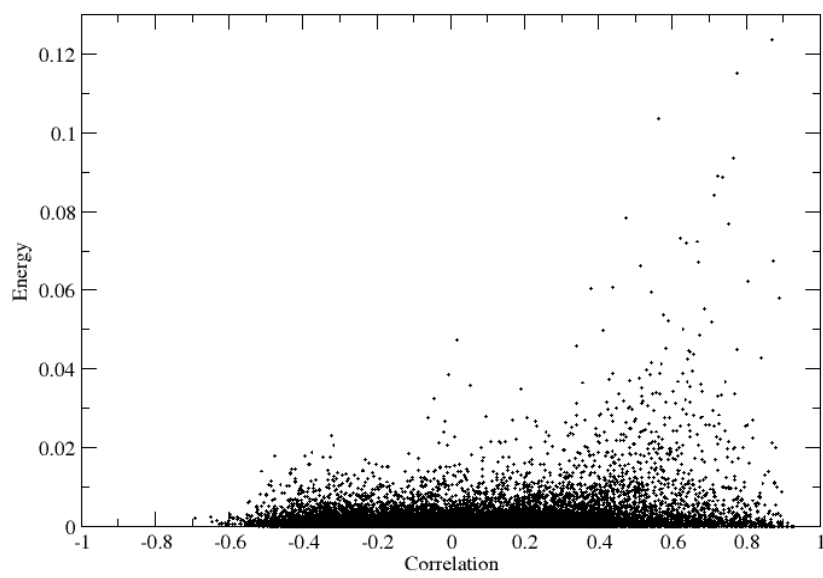

Correlation coefficient = 0.27

## 1K59

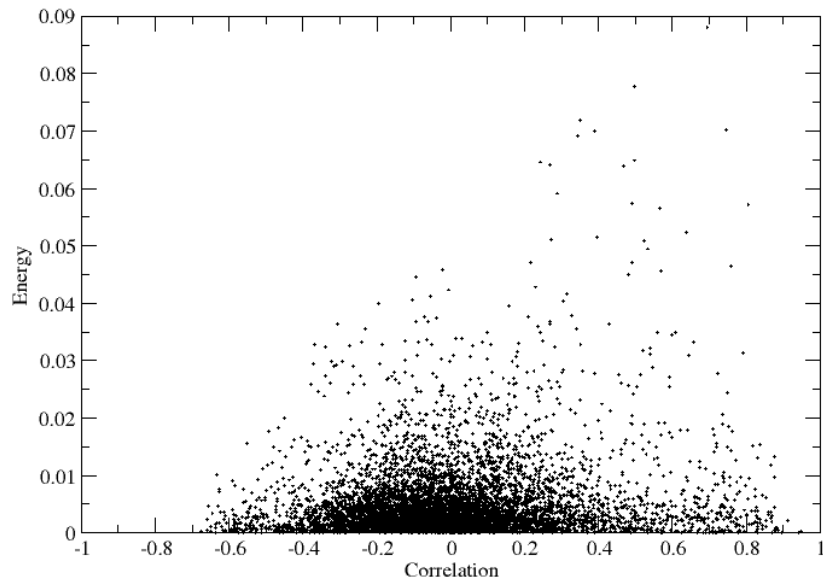

Correlation coefficient = 0.14

## 1KDC

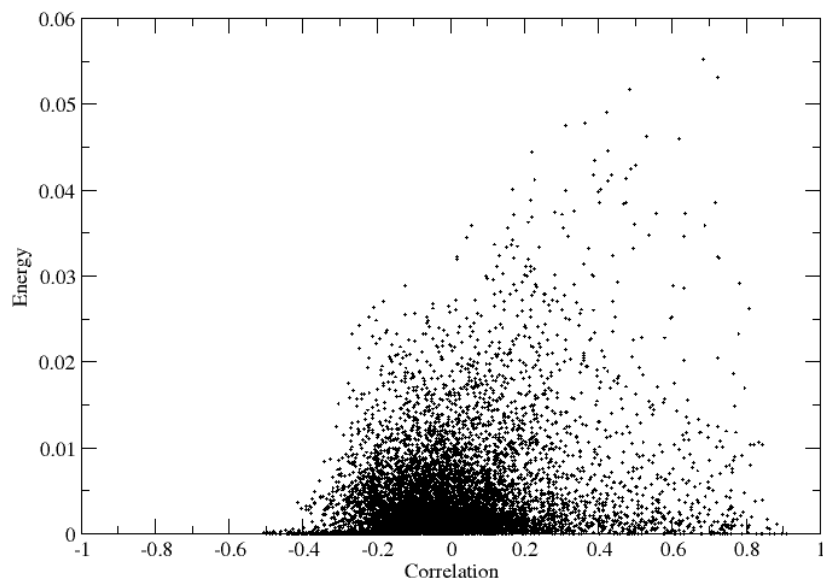

Correlation coefficient = 0.21



## 1KZQ

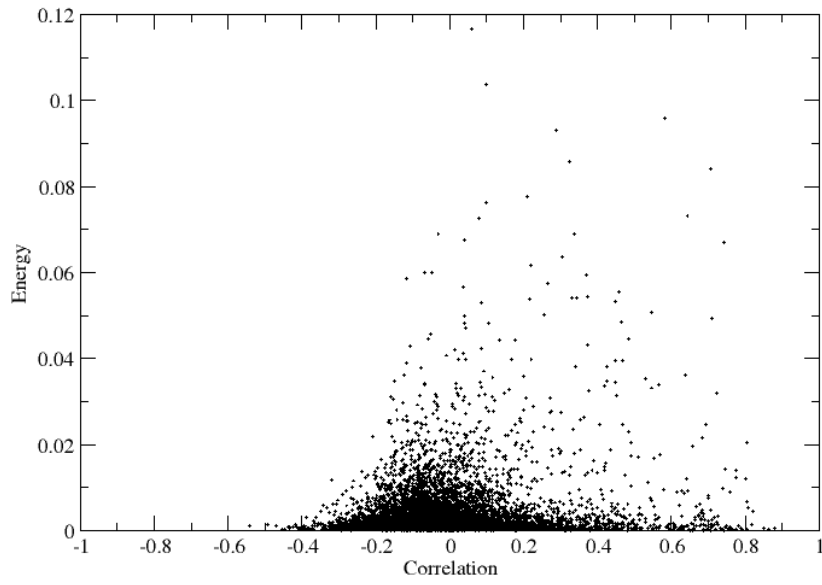

Correlation coefficient = 0.12

## 1P4P

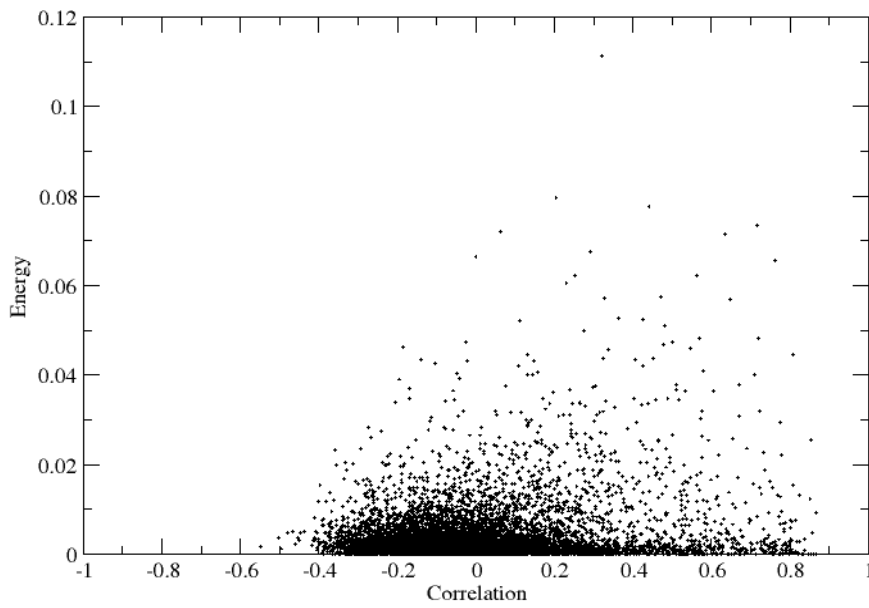

Correlation coefficient = 0.13

## 1PKO

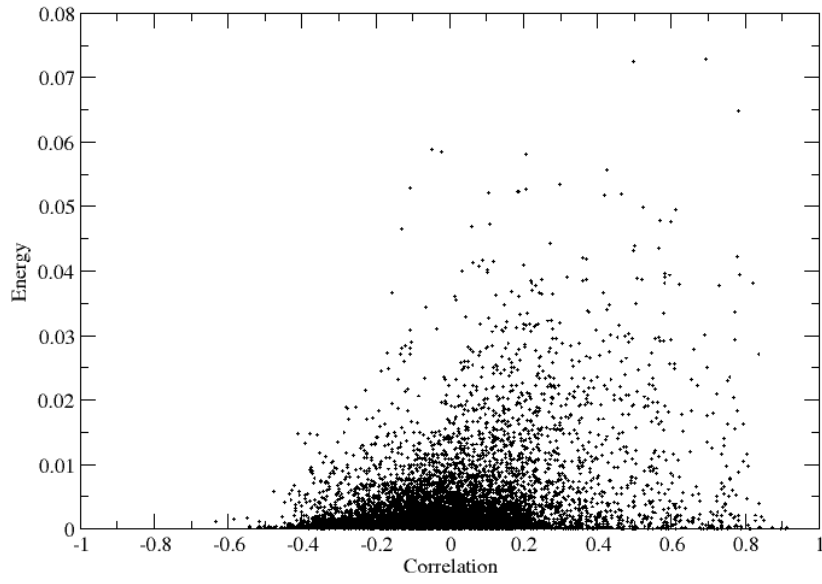

Correlation coefficient = 0.31

## 1POH

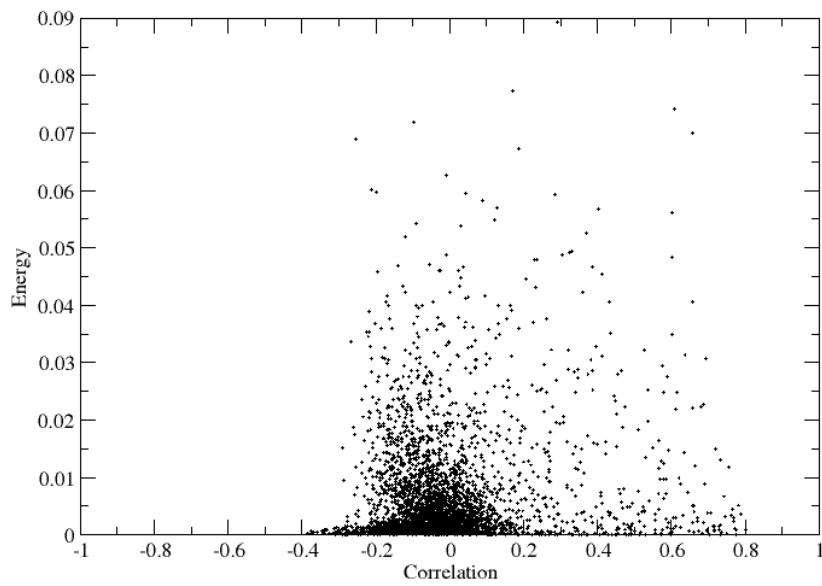

Correlation coefficient = 0.12

### 1TFH

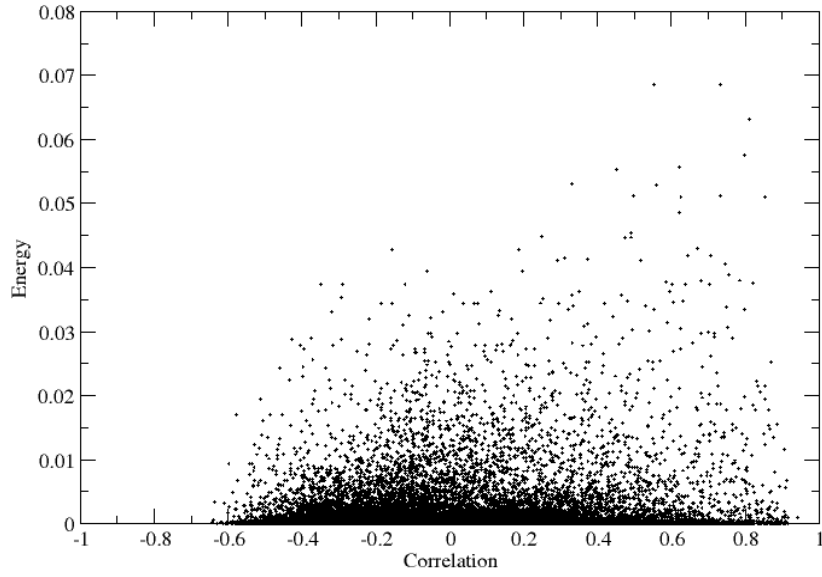

Correlation coefficient = 0.18

### 1UW3

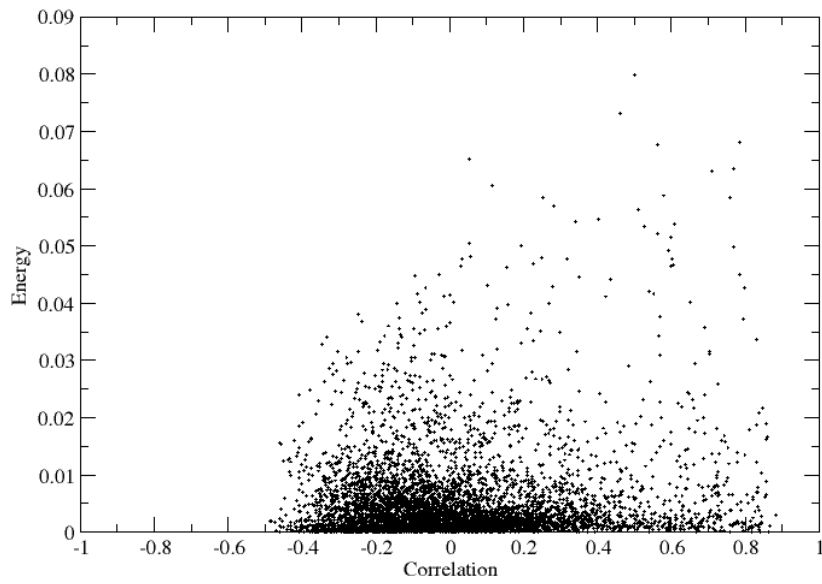

Correlation coefficient = 0.09

## 2VPF

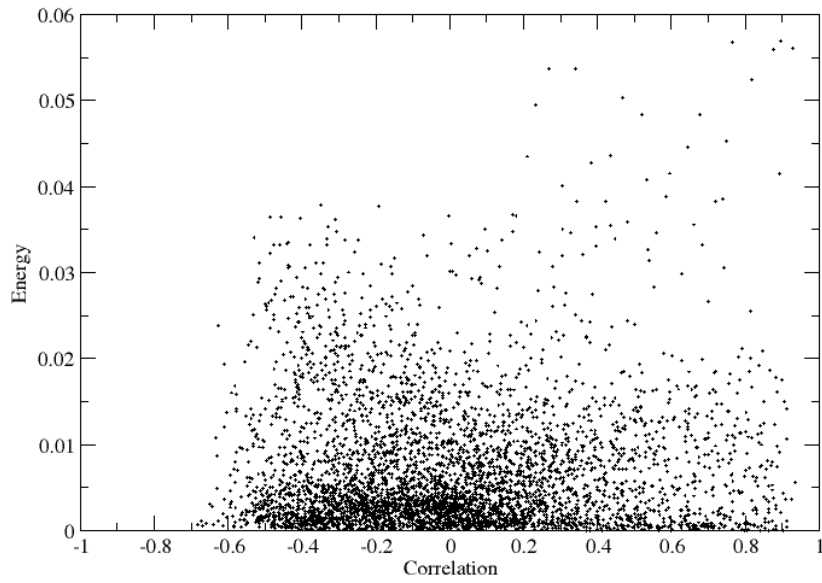

Correlation coefficient = 0.02

## 3LZT

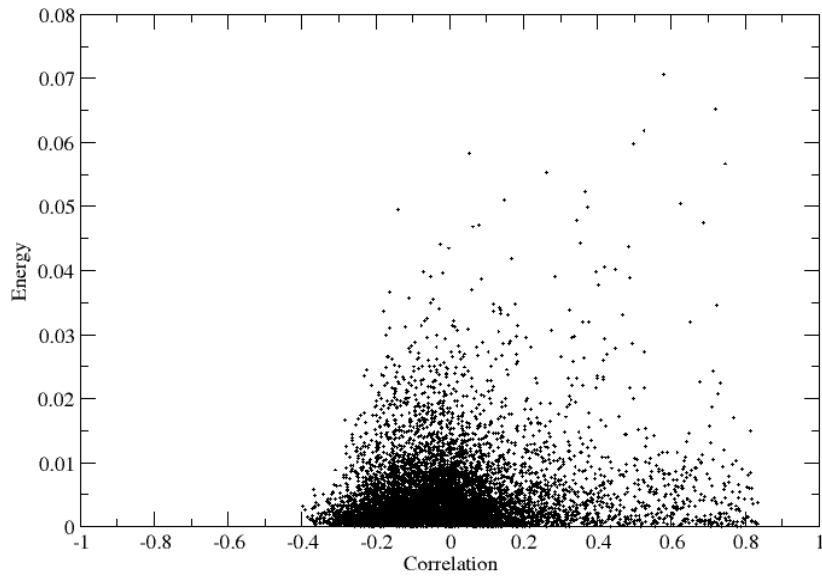

Correlation coefficient = 0.12

# 7NN9

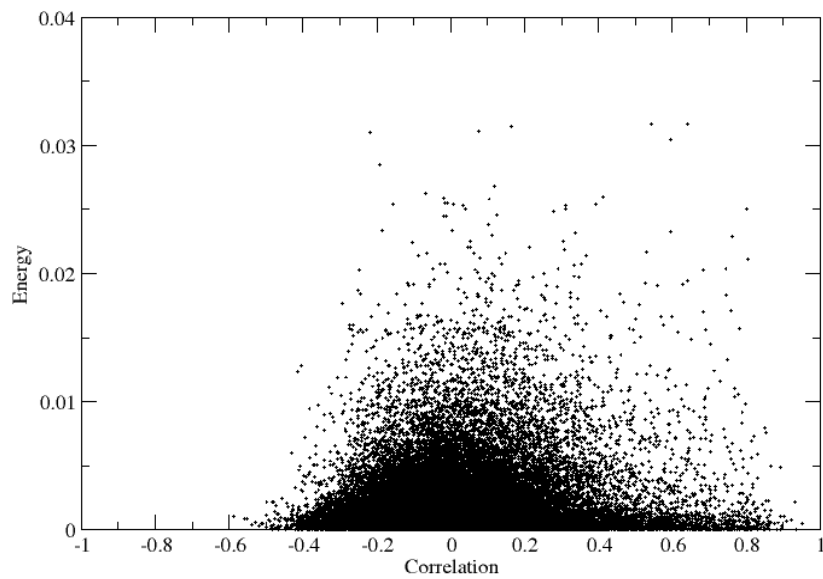

Correlation coefficient = 0.11

# SUPPLEMENTAR Y MATERIAL 2: ALIGNMENT OF ALL ANTIGENS

CLUSTAL 2.0.12 multiple sequence alignment

```
1A03 -----
1CK4 -----
1AUQ -----
1HCN_B -----
2VPF -----
1TFH -----
1POH -----
1P4P -----
1CMW MRGMLPLFEPKGRVLLVDGHHLAYRTFHALKGLTTSRGEVPQAVYGFSAKSLKALKEDGD 60
1KDC -----
1D7P -----
1UW3 -----
1K59 -----
1KZQ -----
3LZT -----
7NN9 -----
1HCN_A -----
1PKO -----
1BV1 -----
1GWP -----

1A03 -----
1CK4 -----
1AUQ -----
1HCN_B -----
2VPF -----
1TFH -----
1POH -----
1P4P -----
1CMW AVIVVFDKAPSPRHEAYGGYKAGRAPTPEDFRQLALIKELVDLLGLARLEVPGEADD 120
1KDC -----
1D7P -----
1UW3 -----
1K59 -----
1KZQ -----
3LZT -----
7NN9 -----
1HCN_A -----
1PKO -----
1BV1 -----
1GWP -----

1A03 -----
1CK4 -----
1AUQ -----
1HCN_B -----
2VPF -----
1TFH -----
1POH -----
1P4P -----
1CMW VLASLAKKAEKEGYEVRILTADKDLYQLLSDR IHVLHPEGYLITPAWLWEKYGLRPDQWA 180
1KDC -----
1D7P -----
1UW3 -----
1K59 -----
1KZQ -----
3LZT -----
7NN9 -----
1HCN_A -----
1PKO -----
1BV1 -----
1GWP -----

1A03 -----
1CK4 -----
1AUQ -----
1HCN_B -----
2VPF -----
1TFH -----
1POH -----
1P4P -----
1CMW DYRALTGDESNDLPGVKGIGEXTARKLLEEWGSLEALLKNLDRKPAIRKILAHMDDLK 240
1KDC -----
1D7P -----
1UW3 -----
1K59 -----
1KZQ -----
3LZT -----
7NN9 -----
1HCN_A -----
1PKO -----
1BV1 -----
1GWP -----

1A03 -----
1CK4 -----
1AUQ -----
1HCN_B -----
2VPF -----
1TFH -----
1POH -----
1P4P -----
1CMW LSWDLAKVRTDLPLEVDFAKRREPDRERLRAFLERLFSGSLLEHFGLESKALEEAPWP 300
1KDC -----
1D7P -----
1UW3 -----
1K59 -----
1KZQ -----
3LZT -----
7NN9 -----
1HCN_A -----
1PKO -----
```

```

1BV1 -----
1GWP -----

1AO3 -----
1CK4 -----
1AUQ -----
1HCN_B -----
2VPF -----
1TFH -----
1POH -----
1P4P -----
1CMW PPEGAFVGFVLSRKEPMWADLLALAAARGGRVHRAPEPYKALRDLKEARGLLAKDLSVLA 360
1KDC -----
1D7P -----
1UW3 -----
1K59 -----
1KZQ -----
3LZT -----
7NN9 -----RDFNNLTKGLCT 12
1HCN_A -----
1PKO -----
1BV1 -----
1GWP -----

1AO3 -----
1CK4 -----
1AUQ -----
1HCN_B -----
2VPF -----
1TFH -----SGTNTVAAYNLTKWS 16
1POH -----
1P4P -----
1CMW LREGLGLPPGDDPMLLAVLLDPSNTTPEGVARRYGGEWTEEAGERAAALSERLFANLWGR 420
1KDC -----
1D7P -----
1UW3 -----
1K59 -----
1KZQ -----SDPPLVANQVVTCPDKKSTAAVILTPTENHFTLCKPKTALT 41
3LZT -----
7NN9 INSWHVIYKDNVAVRIGEDSDVLVTRPEYVSCDPDECRFYALSQGTTRGKHSNGTIHDRS 72
1HCN_A -----
1PKO -----
1BV1 -----
1GWP -----

1AO3 -----CSQPLDVILLDDGSSSFASYFDEMKSFAKAFISKANIGPRLTQVSVL 48
1CK4 -----CSTQLDIVIIVLDGSNSIYP--WESVIAFLNDLLKRMIDIGPKQTVQVIV 46
1AUQ -----DISEPPLHDFYCSRLLDLVFLDGSRLSEAEFEVLKAFVDDMMERLRSQKWRVAVV 59
1HCN_B -----
2VPF -----
1TFH TNFKTILEWEKPKVNVQVYTVQISTKSGDMKSKCFYTTDTECDLTDIEIVKDVKTYLARVF 76
1POH -----
1P4P -----ANKLDSKKLTRSNGTTL 17
1CMW EGEERLLWLRYREVERPLSAVLAHMEATGVRLDVAYLRALSLEVAEEIARLEAEVFRLAGH 480
1KDC -----ATSTKHLKHEPATLIKAIDGDTVKLMYK 28
1D7P -----LNSCSMPLGMEKAISSAQITASSYFTNMFATWSPSKAR 39
1UW3 -----
1K59 -----
1KZQ EPPTLAYSFNRQICPAGTTSSCTSKAVTLSSLIPEAEDSWWTGDSASLDTAGIKLTVPIE 101
3LZT -----
7NN9 QYRALISWPLSSPPTVNSRVECIWSSSTSCHDGKTRMSICISGPNNASAVIWNRRPV 132
1HCN_A -----SKEPLRPRCRPINATLAVE 19
1PKO -----MRSGGQFRVIG-- 11
1BV1 -----GVFNJETETTSVIPAAARLFKAFILD 25
1GWP -----PIVQLQGQMVHQAI SPR 18

1AO3 QYGSITT-----IDVPWNVVEKAHLLSLVDVMQREGGSPQIGDA-LGFAVRYL TSE 99
1CK4 QYGENVT-----HEFNLNKYSSTEEVLAANKIGRQGLQTMALGIDTARKEAFTE 98
1AUQ EYHDGSH-----AYIGLDRKRPSSELRRIASQVKYAGSQVASTSEVLKYTLFQIFSK 111
1HCN_B -----APDQVDCPECTLQENPPFSQPAP-----ILQCMGCCFSR 35
2VPF -----GQNHHEVVKFMDVYQRSYCHPIET-----LVDIFQEYPD 34
1TFH SYPAGNV-----ESTGSAGEPLYENSPEFTPYLETNLGQPTIQSFEQVGTQVNVVTE 128
1POH -----MFQQEVTITAPNGL-----HTRPAAQ 21
1P4P EYSQITD-----ADNATKAVETLKNISKLEGLSVVGGTITVEIKEGTVTLKREIEKDG 69
1CMW PFNLNSRDQLERVLFDLGLPAIGKTEKTKRSTSAVLEALREAHPIVEKILLYRELTK 540
1KDC GQPMFTR-----LLLVDTPETKHPKGVKVEYGEASAFTKKMKVENAKKIEVEFDK 78
1D7P LHLQGRS-----NAWRPQVNNPKEWLVDFQKTMKVTVGVTQGVKSLTSMYVKFE 90
1UW3 -----LGGYMLGSAMSRPLIHPGNDYEDCYRENHMRHPYQVYRVPD 43
1K59 -----EDNSRYTHFLTQHYDAKFPQGRDRDYCESIMRRRGLTSPCKD 41
1KZQ KFPVTTQTFVVGCIKGDDAQSCMVIVTVQARASSVNMVARCSYGDASTLGPVLSAEGP 161
3LZT -----KVFGRCELAAAMKRHGLDNRYGVSGLNWWCAKFESEFNNTQA 42
7NN9 EINTWARNILRTQSESECVCHNGVCPVVFTDGSATGPAETRIYYFKEGKILKWEPLAGTAK 192
1HCN_A KEG-----CPVCITVNTTICAGYCPMTMTRVLQGVLPALPQVVCNRYDVRPES 66
1PKO -----PGHIPRALVGEAEELPCRISPGKNATGMEVWYRSPFSPRVVH 53
1BV1 GDNLPFK-----VAPQAISSEVENIEGNGGPGTIIKISFPEGLPFKYKDRVDEVDH 76
1GWP TLNAAWK-----VVEKAFSPPEVILPMFSALSSEGATQDQLNTMLNTVGGHQAAWQ 67

1AO3 MHGAR--PGASKAVVILVTDVSD--SVDAAAD--AARSNRVTVPF IGIGDRYDAAQLR-- 152
1CK4 ARGAR--RGVKKVMVIVTDGESHNDYRLKQVIQ--DCEDENIQRFSAIALLGHYNRGNLSTE 155
1AUQ IDRPE--ASRIALLMASQEPQRMRSRNFVRYVQ--GLKKKKVIIVPVGIGPHANLKQIR-- 166
1HCN_B AYPTP--LRSKKTMVQKN-----VTSEST--CCVAKSYNRVTV--MGG--FKVENHT-- 80
2VPF EIEYI--FKPSCVPLMRCGG-----CCNDEGL--ECVPTESNITMQIMRICKPHQGOH-- 83
1TFH DERLTL--VRRNNTFLSLRDVFGKDLIYTLYYWK--SSSSGKKTAKTNTNEFLIDVVKGE-- 183
1POH FKVEA--KGFTEIIVTSNG-----KSASAK--SLFKLQTLGLTQGTIVVTIISARGED-- 69
1P4P KVYVF--LNDTAGSNKKTGKWDSTSTLTISAD--SKKTKDLVPLTDGTTIVQOYNTAG-- 124
1CMW LKSTY--IDLPDLIHPRTGRLHTRFNQATATGRLSSSDPNLQNIQVTRTFLQIRIRRAF 598
1KDC GQRTD--KYGRGLAYIYADG-----KMVNEALVRQGLAKVAVYVYVNPNTHEQHLRKS-- 128
1D7P LISSS--QDGHQWTLFFQNGK----VKVPQGNQDSFTPVVNCLEDPPLLTRYLR IHPQS-- 142
1UW3 QYSNQ--NNFVHDCVNIIVKQH---TVITTTKGENFTETDIKIMERVVEQMCITQYQ-- 95
1K59 INTFPI--HGNKRSIKAIENKNGNPHRENLRISKSSQVQVTTCKLHGSSPWPQCYRAT-- 97
1KZQ TTMTL--VCGKDGKVPQDNNQYCSGTTLTGCNEKSFKDI LPLKLTENPWQGNASSDKGAT 219
3LZT TNRNT--DGSTDYGLIQLNSRWNCNDGRTPGSRNLNIPCSALLSSDITASVNCACKIIVS 100
7NN9 HIEBCSCYGERAEITCTCRDNWQGSNRPVIRIDPVAMHTSQQYICSPVLTDNRPNDPTV 252
1HCN_A IRLPGCRGVNPNVVSVAVALSCQCALCRSTDCGGKDHPLTCDDBPFDQSSSSKAP-- 124

```

1PKO LYRNG--KDQDAEQAPEYRGRTELLKESIGEGKVALRIQNVRFSDDEGGYTCFFRDHSY-- 109  
 1BV1 TNFKYNYSVIEGGPIGDTLEKISNEIKIVATPDGGSILKISNKYHTKGDHEVKAEQVK-- 134  
 1GWP MLKKTINEEAAEWDRLHPVHAGPIAPGQMRERPGSDIAGTTSTLQEIQIGWMTNPPIPVG 127  
  
 1AO3 ----ILAGPAGDSNVVKLQRIEDLPTMVTLGNSFLHKLC----- 187  
 1CK4 KFVBEIKSIASEPTEKHFNFVSDDELALVTIVKALGERIFALEA----- 198  
 1AUQ ----LIEKQAPENKAFVLSVDELEQQORDEIVSYLCDLAPAPPT----- 208  
 1HCN\_B -----ACHCSTCYHKS----- 92  
 2VPF -----IGEMSFLOHNCCECRPKKD----- 102  
 1TFH -----NYCFVQAVIPSRIVNRKSTDSFVCEMGEKGEFRE----- 219  
 1POH -----EQKAVEHLVKLMAELE----- 85  
 1P4P -----TSLEGSASEIKNLSELKNALK----- 145  
 1CMW IAEBGWLLVALDYSQIELRVLHLSGDENLIRVFPQGRDIHTETASWMFGVPREAVDPLM 658  
 1KDC -----EAQAKKEKLNWSENADDSGQ----- 149  
 1D7P -----WVHQIALRMEVLGCEAQ----- 159  
 1UW3 -----RESQAYYQGA----- 106  
 1K59 -----AGFRNVVACENGLPVHLDGSIFFRP----- 123  
 1KZQ LTIKKEAFPAESKSVIIGCTGGSPEKHHCTVKLEFAGAAGSAKSAAGTASHVSIFFAMVIG 279  
 3LZT -----DGNMNAWVAWRNRCKGTDVQAMIRGRL----- 129  
 7NN9 GKCNDDYPGNMNNNGVKGFSYLDGVNTWLGRTISIASRSGYEMLKVPNALTDDKSKPTQQG 312  
 1HCN\_A -----PPSLPSPRLPGPSDTPILPO----- 145  
 1PKO -----QEAAVELKVEDPFYWINPGRSR----- 132  
 1BV1 -----ASKEMGETLLRAVESYLLAHSDAYN----- 159  
 1GWP -----EYKRWIIILGLNKIVRMYSPSIL----- 151

1AO3 -----  
 1CK4 -----  
 1AUQ -----  
 1HCN\_B -----  
 2VPF -----  
 1TFH -----  
 1POH -----  
 1P4P -----  
 1CMW RRAAKTINFGVLYGMSAHLRSQELAIPEYEAQAFIERYFQSPFKVRAWIEKTLLEGRRRG 718  
 1KDC -----  
 1D7P -----  
 1UW3 -----  
 1K59 -----  
 1KZQ LIGSIAACVA----- 289  
 3LZT -----  
 7NN9 TIVLNTDWSGYSGSFMDAEGECYRACFYVELIRGRPKEDKVVWTSNSIVSMCSSTFLGQ 372  
 1HCN\_A -----  
 1PKO -----  
 1BV1 -----  
 1GWP -----

1AO3 -----  
 1CK4 -----  
 1AUQ -----  
 1HCN\_B -----  
 2VPF -----  
 1TFH -----  
 1POH -----  
 1P4P -----  
 1CMW YVETLFGRRRYVPDLEARVKSREAAERMAFNMPVQGTAAADLMKILAMVKLFPRLLEEMGAR 778  
 1KDC -----  
 1D7P -----  
 1UW3 -----  
 1K59 -----  
 1KZQ -----  
 3LZT -----  
 7NN9 WDWDGAKIEYFL----- 385  
 1HCN\_A -----  
 1PKO -----  
 1BV1 -----  
 1GWP -----

1AO3 -----  
 1CK4 -----  
 1AUQ -----  
 1HCN\_B -----  
 2VPF -----  
 1TFH -----  
 1POH -----  
 1P4P -----  
 1CMW MLLQVHDELVLLEAPKERAEEAVARLAKEVMGVYPLAVPLEVEVGIGEDWLSAKE 832  
 1KDC -----  
 1D7P -----  
 1UW3 -----  
 1K59 -----  
 1KZQ -----  
 3LZT -----  
 7NN9 -----  
 1HCN\_A -----  
 1PKO -----  
 1BV1 -----  
 1GWP -----



### SUPPLEMENTARY MATERIAL 3: ALIGNMENT OF EPITOPE SEQUENCES

|                                                   |                                                   |    |
|---------------------------------------------------|---------------------------------------------------|----|
| 1CK4                                              | -----SNSIY-----                                   | 5  |
| 7NN9                                              | --PRPNISIASRSLNTD-----W-----                      | 16 |
| 1AUQ                                              | ----QRMS--RNFVR-----                              | 9  |
| 3LZT                                              | ---RHGLDNYRGYSQATNRNTDGRWWCNDGRTPGSRNLSDGNGTDVQ   | 44 |
| 1P4P                                              | ---GSNADSKKNTAGT-----                             | 13 |
| 1CMW                                              | ---SNTTPEKSTYIDP-----                             | 13 |
| 1AO3                                              | ---ITTIDVPWNVVPEKAHSLVDVMHGAR-----                | 26 |
| 1KZQ                                              | ---TALTEPPTSCTSKAV-----                           | 15 |
| 1TFH                                              | ---KDLIYTLYKKTAKTNQAVIPVNRKSTD-----               | 27 |
| 1UW3                                              | ----KQHTVTTTTTKGE-----                            | 12 |
| 2VPF                                              | ---KFMDVYQRSYCHPYIFKQIMRIKPHQGQHIGEM-----         | 33 |
| 1BV1                                              | ----ENIEGNGGPGT-----                              | 11 |
| 1GWP                                              | PIVQNLQGQFSPEVIPMFNEEAAEWDRHLHPVHAGPIAPGQMRLQEIQI | 47 |
| 1POH                                              | -MFQQSAEGEDEQKAVEH-----                           | 17 |
| 1K59                                              | ----GLTSPCKDGGSPWPP-----                          | 15 |
| 1KDC                                              | --TKHPKKGVEKYAF'TKYADGKM-----                     | 21 |
| 1PKO                                              | ---KNATGRDHSYQEE-----                             | 13 |
| 1HCN                                              | ---ENPFFSQPRVLQPRGVNPPVVS-----                    | 21 |
| 1D7P                                              | ---TNMFATWRPQVSLLT-----                           | 15 |
| >1AO3                                             |                                                   |    |
| ITTIDVPWNVVPEKAHSLVDVMHGAR                        |                                                   |    |
| >1AUQ                                             |                                                   |    |
| QRMSRNFVR                                         |                                                   |    |
| >1BV1                                             |                                                   |    |
| ENIEGNGGPGT                                       |                                                   |    |
| >1CK4                                             |                                                   |    |
| SNSIY                                             |                                                   |    |
| >1CMW                                             |                                                   |    |
| SNTTPEKSTYIDP                                     |                                                   |    |
| >1D7P                                             |                                                   |    |
| TNMFATWRPQVSLLT                                   |                                                   |    |
| >1GWP                                             |                                                   |    |
| PIVQNLQGQFSPEVIPMFNEEAAEWDRHLHPVHAGPIAPGQMRLQEIQI |                                                   |    |
| >1HCN                                             |                                                   |    |
| ENPFFSQPRVLQPRGVNPPVVS                            |                                                   |    |
| >1K59                                             |                                                   |    |
| GLTSPCKDGGSPWPP                                   |                                                   |    |
| >1KDC                                             |                                                   |    |
| TKHPKKGVEKYAF'TKYADGKM                            |                                                   |    |
| >1KZQ                                             |                                                   |    |
| TALTEPPTSCTSKAV                                   |                                                   |    |
| >1P4P                                             |                                                   |    |
| GSNADSKKNTAGT                                     |                                                   |    |
| >1PKO                                             |                                                   |    |
| KNATGRDHSYQEE                                     |                                                   |    |
| >1POH                                             |                                                   |    |
| MFQQSAEGEDEQKAVEH                                 |                                                   |    |
| >1TFH                                             |                                                   |    |
| KDLIYTLYKKTAKTNQAVIPVNRKSTD                       |                                                   |    |
| >1UW3                                             |                                                   |    |
| KQHTVTTTTTKGE                                     |                                                   |    |
| >2VPF                                             |                                                   |    |
| KFMDVYQRSYCHPYIFKQIMRIKPHQGQHIGEM                 |                                                   |    |
| >3LZT                                             |                                                   |    |
| RHGLDNYRGYSQATNRNTDGRWWCNDGRTPGSRNLSDGNGTDVQ      |                                                   |    |
| >7NN9                                             |                                                   |    |
| PRPNISIASRSLNTDW                                  |                                                   |    |
